# Supplementary material for: Heteroannulation enabled by a bimetallic Rh(iii)/Ag(i) relay catalysis: application in the total synthesis of aristolactam BII
Source: Royal Society of Chemistry journal article supplement (doi:10.1039/c7cc02105d), 2017-01-01

# Heteroannulation Enabled by a Bimetallic Rh(III)/Ag(I) Relay Catalysis: Application in Total Synthesis of Aristolactams BII

Wei-Wei Ji, E Lin, Qingjiang Li and Honggen Wang\*

*School of Pharmaceutical Sciences, Sun Yat-sen University, Guangzhou, 510006, China*

## Support information

### Contents

|                                                                                              |    |
|----------------------------------------------------------------------------------------------|----|
| I. General considerations.....                                                               | 2  |
| II. Preparation and characterization of starting materials .....                             | 3  |
| III. Synthesis and characterization of 3-alkylidene isoindolinones and compound 5 .....      | 6  |
| IV. Synthesis and characterization of 3-alkylidene isobenzofuranones and compound 8<br>..... | 16 |
| V. Derivatization of 3-alkylidene isoindolinone 4a.....                                      | 22 |
| VI. Total synthesis of aristolactam BII .....                                                | 26 |
| VII. Controlled experiments.....                                                             | 30 |
| VIII. X-ray crystal structure data .....                                                     | 31 |
| IX. References.....                                                                          | 45 |
| X. NMR Spectra.....                                                                          | 46 |

## I. General considerations

Unless otherwise noted, all reactions were carried out under an air atmosphere. If reaction was not carried out at room temperature, reaction temperatures are reported as the temperature of the bath surrounding the vessel unless otherwise stated. The dry solvents used were purified by distillation over the drying agents indicated in parentheses and were transferred under argon: toluene (Na-benzophenone), THF (Na-benzophenone).  $\text{CF}_3\text{CH}_2\text{OH}$ , HFIP,  $\text{CH}_3\text{CN}$ , MeOH, EtOH, THF, 1,4-dioxane and  $\text{CH}_2\text{Cl}_2$  were purchased from Acros Organics. Commercially available chemicals were obtained from commercial suppliers and used without further purification unless otherwise stated. Analytical thin layer chromatography was performed on Polygram SIL G/UV254 plates. Visualization was accomplished with short wave UV light, or  $\text{KMnO}_4$  staining solutions followed by heating. Flash chromatography was performed on silica gel (200-300 mesh) by standard technique. Nuclear magnetic resonance spectra ( $^1\text{H}$  NMR,  $^{13}\text{C}$  NMR,  $^{19}\text{F}$  NMR) were recorded with Bruker AV ( $^1\text{H}$  at 400 MHz,  $^{13}\text{C}$  at 101 MHz,  $^{19}\text{F}$  at 376 MHz) unless noted. Chemical shifts ( $\delta$ ) are given in ppm relative to TMS. The residual solvent signals were used as references and the chemical shifts converted to the TMS scale ( $\text{CDCl}_3$ :  $\delta_{\text{H}} = 7.26$  ppm,  $\delta_{\text{C}} = 77.16$  ppm;  $d_6$ -DMSO:  $\delta_{\text{H}} = 2.50$  ppm,  $\delta_{\text{C}} = 39.52$  ppm;  $d_4$ -MeOD:  $\delta_{\text{H}} = 3.31$  ppm,  $\delta_{\text{C}} = 49.00$  ppm,  $d_6$ -Acetone:  $\delta_{\text{H}} = 2.05$  ppm,  $\delta_{\text{C}} = 29.84$  ppm). The following abbreviations were used to describe peak splitting patterns when appropriate: s = singlet, d = doublet, t = triplet, q = quartet, m = multiplet, dd = doublet of doublet. Coupling constants, J were reported in hertz unit (Hz). High-resolution mass spectra (HRMS) were recorded on a BRUKER VPEXII spectrometer with EI and ESI mode unless otherwise stated.

## II. Preparation and characterization of starting materials

### i. Preparation of 2,2-difluorovinyl tosylate **1**

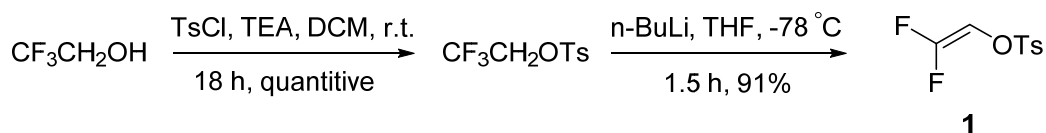

The compound **1** was prepared according to a known procedure.<sup>1</sup>

### ii. General procedure for the preparation of *N*-tosylbenzamides **3**

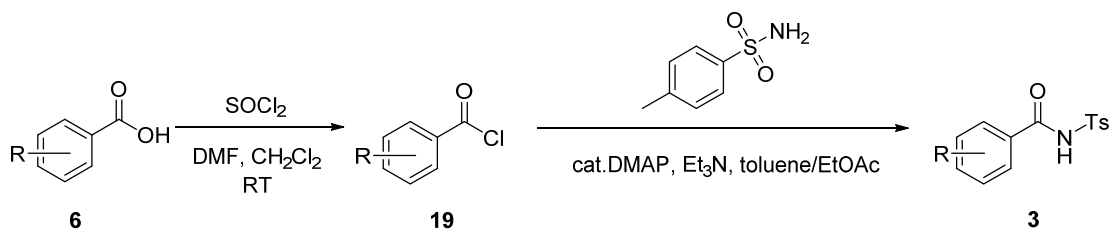

**General procedure A:** To a round-bottom flask charged with carboxylic acid **6** (5 mmol) in dry dichloromethane (25 mL), were added sulfurous dichloride (0.718 g, 6.0 mmol) and DMF (0.007 g, 0.1 mmol). The reaction mixture was then stirred at room temperature and monitored by TLC. After the reaction was completed (typically 0.5-3 h), the volatile was removed under reduced pressure to give the crude acyl chloride which was used directly in the next step.<sup>2</sup>

To a round-bottom flask charged with *p*-toluene sulfonamide (1.0 equiv), ethyl acetate (2.0 mL/mmol), triethylamine (2.5 equiv) and DMAP (0.5 mol %), was added a toluene (0.8 mL/mmol) solution of acid chloride (1.1 equiv) via a syringe over 15 minutes under  $\text{N}_2$ . The mixture was then stirred at  $55^\circ\text{C}$  for 1 h. After cooled to room temperature, the reaction was quenched with diluted hydrochloric acid. The resulting mixture was then extracted with  $\text{EtOAc}$  (3 times). The combined organic layer was dried over  $\text{MgSO}_4$ , filtered and evaporated. The residue was purified by passing through a pad of silica gel eluting with  $\text{CH}_2\text{Cl}_2$ .<sup>3b</sup>

Spectral data for **3a-3e**, **3g**, **3h**, **3k**, **3l**, **3n**, **3o**, **3q** and **3r** are consistent with the reported literatures.<sup>3</sup>

#### 4-iodo-*N*-tosylbenzamide (**3d**)

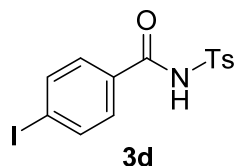

Starting from 4-iodobenzoic acid (1.0 g, 4.00 mmol), by following general procedure A, *N*-tosylbenzamide **3d** was obtained as a white solid (0.37g, 23% yield).

<sup>1</sup>H NMR (400 MHz, CDCl<sub>3</sub>) δ 8.86 (s, 1H), 8.03 (d, *J* = 8.4 Hz, 2H), 7.81 (d, *J* = 8.6 Hz, 2H), 7.48 (d, *J* = 8.5 Hz, 2H), 7.36 (d, *J* = 8.2 Hz, 2H), 2.44 (s, 3H).

<sup>13</sup>C NMR (101 MHz, CDCl<sub>3</sub>) δ 164.0, 145.6, 138.3, 135.4, 130.8, 129.8, 129.4, 128.8, 101.4, 21.9.

ESI-MS: calculated C<sub>14</sub>H<sub>12</sub>INO<sub>3</sub>S [M+H]<sup>+</sup>, 401.9655; Found 401.9657.

#### 4-(methylthio)-*N*-tosylbenzamide (**3f**)

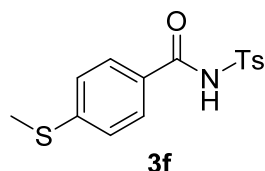

Starting from 4-(methylthio)benzoic acid (1.0 g, 6.0 mmol), by following general procedure A, *N*-tosylbenzamide **3f** was obtained as a white solid (0.45 g, 30% yield).

<sup>1</sup>H NMR (400 MHz, CDCl<sub>3</sub>) δ 8.81 (s, 1H), 8.35 – 7.86 (m, 2H), 7.67 (d, *J* = 8.6 Hz, 2H), 7.35 (d, *J* = 8.1 Hz, 2H), 7.23 (d, *J* = 8.6 Hz, 2H), 2.49 (s, 3H), 2.44 (s, 3H).

<sup>13</sup>C NMR (101 MHz, CDCl<sub>3</sub>) δ 163.8, 146.9, 145.3, 135.7, 129.8, 128.8, 128.2, 127.1, 125.4, 21.8, 14.9.

ESI-MS: calculated C<sub>15</sub>H<sub>15</sub>NO<sub>3</sub>S<sub>2</sub> [M+H]<sup>+</sup>, 322.0566; Found 322.0561.

#### 4-cyano-*N*-tosylbenzamide (**3i**)

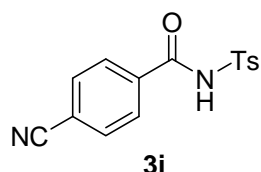

Starting from 4-cyanobenzoic acid (1.0 g, 6.8 mmol), by following general procedure A, *N*-tosylbenzamide **3i** was obtained as a white solid (0.24 g, 12% yield).

<sup>1</sup>H NMR (400 MHz, CDCl<sub>3</sub>) δ 9.30 (s, 1H), 8.03 (d, *J* = 8.4 Hz, 2H), 7.91 (d, *J* = 8.5 Hz, 2H), 7.74 (d, *J* = 8.5 Hz, 2H), 7.38 (d, *J* = 8.2 Hz, 2H), 2.45 (s, 3H).

<sup>13</sup>C NMR (101 MHz, CDCl<sub>3</sub>) δ 162.9, 145.8, 135.3, 135.2, 132.8, 129.9, 128.9, 128.6, 117.6, 117.1, 21.9.

ESI-MS: calculated  $C_{15}H_{12}N_2O_3S$   $[M+H]^+$ , 301.0641; Found 301.0648.

### 3-iodo-N-tosylbenzamide (3m)

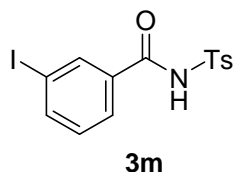

Starting from 3-iodobenzoic acid (1.0 g, 4.00 mmol), by following general procedure A, *N*-tosylbenzamide **3m** was obtained as a white solid (0.58 g, 36% yield).

$^1H$  NMR (400 MHz,  $CDCl_3$ )  $\delta$  8.74 (s, 1H), 8.10 (s, 1H), 8.03 (d,  $J = 8.1$  Hz, 2H), 7.89 (d,  $J = 7.9$  Hz, 1H), 7.72 (d,  $J = 7.8$  Hz, 1H), 7.36 (d,  $J = 8.1$  Hz, 2H), 7.19 (t,  $J = 7.9$  Hz, 1H), 2.45 (s, 3H).

$^{13}C$  NMR (101 MHz,  $CDCl_3$ )  $\delta$  163.0, 145.4, 142.2, 136.9, 135.3, 133.1, 130.4, 129.7, 128.7, 126.9, 94.3, 21.7.

ESI-MS: calculated  $C_{14}H_{12}INO_3S$   $[M+H]^+$ , 401.9655; Found 401.9648.

### 3-(dimethylamino)-N-tosylbenzamide (3p)

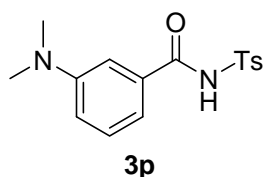

Starting from 3-(dimethylamino)benzoic acid (1.0 g, 3.75 mmol), by following general procedure A, *N*-tosylbenzamide **3p** was obtained as a white solid (0.62 g, 32% yield).

$^1H$  NMR (400 MHz,  $CDCl_3$ )  $\delta$  8.04 (d,  $J = 8.3$  Hz, 2H), 7.35 (d,  $J = 8.1$  Hz, 2H), 7.26 (t,  $J = 7.9$  Hz, 1H), 7.09 (s, 1H), 6.97 (d,  $J = 7.8$  Hz, 1H), 6.87 (d,  $J = 10.9$  Hz, 1H), 2.96 (s, 6H), 2.44 (s, 3H).

$^{13}C$  NMR (101 MHz,  $CDCl_3$ )  $\delta$  165.0, 150.9, 145.2, 135.8, 132.1, 129.7, 129.6, 128.8, 117.1, 114.8, 111.4, 40.5, 21.8.

ESI-MS: calculated  $C_{16}H_{18}N_2O_3S$   $[M+H]^+$ , 319.1111; Found 319.1107.

### methyl 3-(tosylcarbamoyl)benzoate (3j)

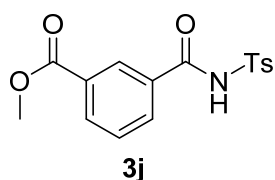

Starting from 3-(methoxycarbonyl)benzoic acid (1.0 g, 5.56 mmol), by following general procedure A, *N*-tosylbenzamide **3j** was obtained as a white solid (0.35 g, 19% yield).

$^1H$  NMR (400 MHz,  $CDCl_3$ )  $\delta$  9.86 (s, 1H), 8.53 (s, 1H), 8.18 (dt,  $J = 7.8, 1.4$  Hz, 1H), 8.11 – 7.99 (m, 3H), 7.50 (t,  $J = 7.8$  Hz, 1H), 7.33 (d,  $J = 8.1$  Hz, 2H), 3.86 (s, 3H), 2.42 (s, 3H).

$^{13}\text{C}$  NMR (101 MHz,  $\text{CDCl}_3$ )  $\delta$  166.1, 163.8, 145.4, 135.5, 134.2, 132.6, 131.8, 130.9, 129.7, 129.3, 128.9, 128.8, 52.6, 21.8.

ESI-MS: calculated  $\text{C}_{16}\text{H}_{15}\text{NO}_5\text{S}$   $[\text{M}+\text{H}]^+$ , 334.0744; Found 334.0738.

### 3,4-dimethoxy-N-tosylbenzamide (3s)

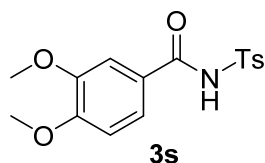

Starting from 3,4-dimethoxybenzoic acid (1.0 g, 5.49 mmol), by following general procedure A, *N*-tosylbenzamide **3s** was obtained as a white solid (0.46 g, 25% yield).

$^1\text{H}$  NMR (400 MHz,  $\text{CDCl}_3$ )  $\delta$  8.03 (d,  $J$  = 8.3 Hz, 2H), 7.47 (dd,  $J$  = 8.6, 2.1 Hz, 1H), 7.39 (d,  $J$  = 2.1 Hz, 1H), 7.34 (d,  $J$  = 8.0 Hz, 2H), 6.83 (d,  $J$  = 8.5 Hz, 1H), 3.88 (d,  $J$  = 1.3 Hz, 3H), 3.82 (d,  $J$  = 1.3 Hz, 3H), 2.42 (s, 3H).

$^{13}\text{C}$  NMR (101 MHz,  $\text{CDCl}_3$ )  $\delta$  164.2, 153.6, 149.2, 145.2, 135.8, 129.7, 128.7, 123.6, 121.8, 110.9, 110.6, 56.2, 56.2, 21.8.

ESI-MS: calculated  $\text{C}_{16}\text{H}_{17}\text{NO}_5\text{S}$   $[\text{M}+\text{H}]^+$ , 336.0900; Found 336.0899.

## III. Synthesis and characterization of 3-alkylidene isoindolinones and compound 5

### i. Synthesis and characterization of 3-alkylidene isoindolinones

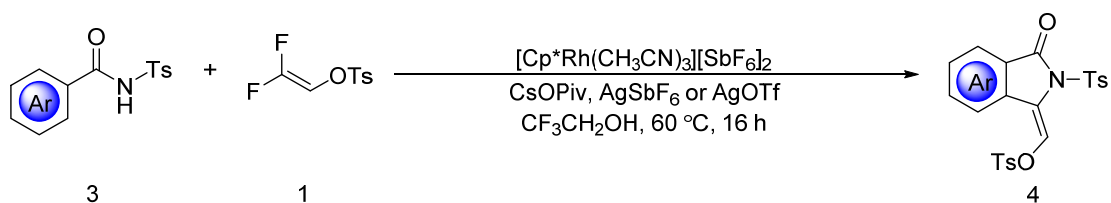

**General procedure B:** To an oven-dried Schlenk tube charged with a stirring bar, were added *N*-tosylbenzamide **3** (0.2 mmol, 1.0 equiv), 2,2-difluorovinyl tosylate **1** (70.2 mg, 0.3 mmol, 1.5 equiv),  $[\text{Cp}^*\text{Rh}(\text{CH}_3\text{CN})_3][\text{SbF}_6]_2$  (8.3 mg, 0.01 mmol, 5 mol %),  $\text{AgSbF}_6$  (13.7 mg, 0.04 mmol, 20 mol %) or  $\text{AgOTf}$  (10.3 mg, 0.04 mmol, 20 mol %) and  $\text{CsOPiv}$  (47.0 mg, 0.2 mmol, 1.0 equiv) in the glove box. The tube

was then moved out and 2,2,2-trifluoroethanol (TFE) (1.0 mL) was added under N<sub>2</sub>. The mixture was stirred at 60 °C for 16 h. The reaction mixture was diluted with dichloromethane and the volatiles were removed under reduced pressure. The pure product was obtained by flash chromatography (silica gel; petroleum ether/ dichloromethane).

**(E)-(3-oxo-2-tosylisoindolin-1-ylidene)methyl 4-methylbenzenesulfonate (4a)**

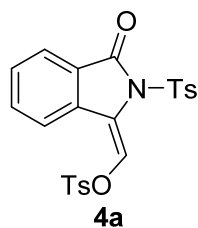

Following general procedure B using AgSbF<sub>6</sub> as additive, **4a** was obtained in 83% yield (78.1 mg, 0.167 mmol) as a white solid after column chromatography (eluent = Petroleum ether/ dichloromethane 1:1 v/v).

R<sub>F</sub> (Petroleum ether/ dichloromethane 1:2): 0.18.

<sup>1</sup>H NMR (400 MHz, CDCl<sub>3</sub>) δ 8.05 (d, *J* = 8.0 Hz, 1H), 8.02 (s, 1H), 7.91 (d, *J* = 8.3 Hz, 4H), 7.76 (d, *J* = 7.6 Hz, 1H), 7.65 (td, *J* = 7.7, 1.2 Hz, 1H), 7.47 (td, *J* = 7.6, 0.9 Hz, 1H), 7.39 (d, *J* = 8.1 Hz, 2H), 7.31 (d, *J* = 8.1 Hz, 2H), 2.46 (s, 3H), 2.41 (s, 3H).

<sup>13</sup>C NMR (101 MHz, CDCl<sub>3</sub>) δ 164.3, 146.4, 145.9, 135.3, 134.9, 134.4, 131.9, 130.5, 130.3, 130.0, 128.4, 128.3, 127.4, 126.5, 126.3, 125.4, 124.7, 21.9, 21.9.

ESI-MS: calculated C<sub>23</sub>H<sub>19</sub>NO<sub>6</sub>S<sub>2</sub> [M+H]<sup>+</sup>, 470.0727; Found 470.0723.

**(E)-(6-methyl-3-oxo-2-tosylisoindolin-1-ylidene)methyl**

**4-methylbenzenesulfonate (4b)**

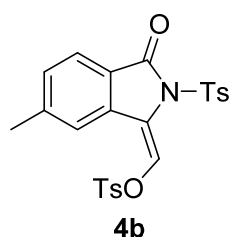

Following general procedure B using AgOTf as additive, **4b** was obtained in 72% yield (70.0 mg, 0.145 mmol) as a white solid after column chromatography (eluent = Petroleum ether/ dichloromethane 1:1 v/v).

R<sub>F</sub> (Petroleum ether/ dichloromethane 1:2): 0.29.

<sup>1</sup>H NMR (400 MHz, CDCl<sub>3</sub>) δ 7.99 (s, 1H), 7.90 (t, *J* = 8.2 Hz, 4H), 7.79 (s, 1H), 7.63 (d, *J* = 7.8 Hz, 1H), 7.38 (d, *J* = 8.1 Hz, 2H), 7.29 (d, *J* = 8.6 Hz, 3H), 2.45 (s, 3H), 2.45 (s, 3H), 2.40 (s, 3H).

<sup>13</sup>C NMR (101 MHz, CDCl<sub>3</sub>) δ 164.3, 146.4, 146.2, 145.8, 135.2, 134.6, 131.8, 131.5, 130.4, 129.9, 128.4, 128.2, 127.1, 126.4, 125.5, 124.5, 124.0, 22.5, 21.9, 21.8.

ESI-MS: calculated  $C_{24}H_{21}NO_6S_2$   $[M+H]^+$ , 484.0883; Found 484.0878.

**(E)-(6-methoxy-3-oxo-2-tosylisoindolin-1-ylidene)methyl**

**4-methylbenzenesulfonate (4c)**

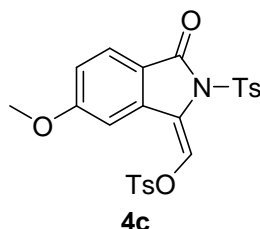

Following general procedure B using AgOTf as additive, **4c** was obtained in 61% yield (61.4 mg, 0.123 mmol) as a white solid after column chromatography (eluent = Petroleum ether/dichloromethane 1:1 v/v).

$R_F$  (Petroleum ether/ dichloromethane 1:2): 0.50.

$^1H$  NMR (400 MHz,  $CDCl_3$ )  $\delta$  7.98 (s, 1H), 7.89 (t,  $J$  = 8.6 Hz, 4H), 7.65 (d,  $J$  = 8.6 Hz, 1H), 7.48 (d,  $J$  = 2.2 Hz, 1H), 7.39 (d,  $J$  = 8.1 Hz, 2H), 7.29 (d,  $J$  = 8.1 Hz, 2H), 6.97 (dd,  $J$  = 8.6, 2.3 Hz, 1H), 3.86 (s, 3H), 2.46 (s, 3H), 2.40 (s, 3H).

$^{13}C$  NMR (101 MHz,  $CDCl_3$ )  $\delta$  165.1, 163.9, 146.5, 145.8, 136.6, 135.2, 131.8, 130.4 (2C), 129.9 (2C), 128.3 (2C), 128.1 (2C), 127.3, 126.4, 126.3, 119.0, 118.0, 108.9, 55.9, 21.9, 21.8.

ESI-MS: calculated  $C_{24}H_{21}NO_7S_2$   $[M+H]^+$ , 500.0832; Found 500.0834.

**(E)-(6-iodo-3-oxo-2-tosylisoindolin-1-ylidene)methyl**

**4-methylbenzenesulfonate (4d)**

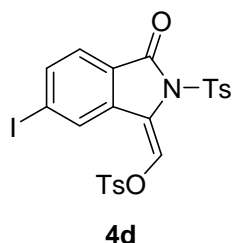

Following general procedure B using AgOTf as additive, **4d** was obtained in 51% yield (61.1 mg, 0.102 mmol) as a white solid after column chromatography (eluent = Petroleum ether/ dichloromethane 1:1 v/v).

$R_F$  (Petroleum ether/ dichloromethane 1:1): 0.20.

$^1H$  NMR (400 MHz,  $CDCl_3$ )  $\delta$  8.29 (s, 1H), 8.05 (s, 1H), 7.90 (dd,  $J$  = 8.4, 2.0 Hz, 4H), 7.79 (dd,  $J$  = 8.1, 1.3 Hz, 1H), 7.45 (d,  $J$  = 8.1 Hz, 1H), 7.40 (d,  $J$  = 8.1 Hz, 2H), 7.31 (d,  $J$  = 8.1 Hz, 2H), 2.45 (s, 3H), 2.41 (s, 3H).

$^{13}C$  NMR (101 MHz,  $CDCl_3$ )  $\delta$  162.6, 145.5, 145.0, 138.3, 134.3, 133.8, 133.0, 130.6, 129.4, 128.9, 127.2, 127.1, 126.9, 124.6, 123.8, 101.3, 20.8, 20.7.

ESI-MS: calculated  $C_{23}H_{18}INO_6S_2$   $[M+H]^+$ , 595.9693; Found 595.9697.

**(E)-(6-bromo-3-oxo-2-tosylisoindolin-1-ylidene)methyl**

**4-methylbenzenesulfonate (4e)**



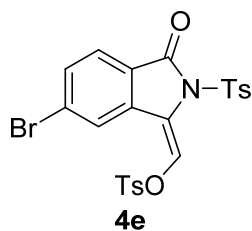

Following general procedure B using AgOTf as additive, **4e** was obtained in 81% yield (88.0 mg, 0.160 mmol) as a white solid after column chromatography (eluent = Petroleum ether/ dichloromethane 1:1 v/v).

$R_F$  (Petroleum ether/ dichloromethane 1:1): 0.4.

$^1H$  NMR (400 MHz,  $CDCl_3$ )  $\delta$  8.10 (s, 1H), 8.06 (s, 1H), 7.91 (dd,  $J = 8.4, 2.4$  Hz, 4H), 7.64 – 7.55 (m, 2H), 7.40 (d,  $J = 8.0$  Hz, 2H), 7.32 (d,  $J = 8.1$  Hz, 2H), 2.46 (s, 3H), 2.42 (s, 3H).

$^{13}C$  NMR (101 MHz,  $CDCl_3$ )  $\delta$  163.5, 146.6, 146.2, 135.6, 134.9, 133.6, 131.7, 130.6, 130.0, 129.9, 128.4, 128.3, 128.2, 128.2, 125.9, 125.2, 125.1, 21.9, 21.9.

ESI-MS: calculated  $C_{23}H_{18}BrNO_6S_2$   $[M+H]^+$ , 547.9832; Found 547.9828.

#### **(E)-(6-(methylthio)-3-oxo-2-tosylisoindolin-1-ylidene)methyl**

##### **4-methylbenzenesulfonate (4f)**

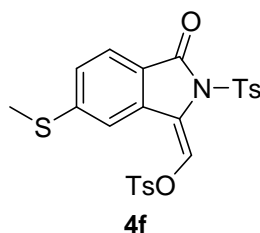

Following general procedure B using AgOTf as additive, **4f** was obtained in 35% yield (36.4 mg, 0.071 mmol) as a white solid after column chromatography (eluent = Petroleum ether/ dichloromethane 1:1 v/v).

$R_F$  (Petroleum ether/ dichloromethane 1:2): 0.19.

$^1H$  NMR (400 MHz,  $CDCl_3$ )  $\delta$  7.99 (s, 1H), 7.90 (dd,  $J = 8.4, 2.8$  Hz, 4H), 7.79 (d,  $J = 1.6$  Hz, 1H), 7.61 (d,  $J = 8.2$  Hz, 1H), 7.40 (d,  $J = 8.1$  Hz, 2H), 7.30 (d,  $J = 8.1$  Hz, 2H), 7.27 (d,  $J = 8.1$  Hz, 1H), 2.52 (s, 3H), 2.47 (s, 3H), 2.41 (s, 3H).

$^{13}C$  NMR (101 MHz,  $CDCl_3$ )  $\delta$  164.0, 148.9, 146.5, 145.9, 135.2, 135.1, 131.8, 130.5, 129.9, 128.4, 128.2, 127.4, 127.3, 126.3, 124.5, 122.6, 120.4, 21.9, 21.9, 15.1.

ESI-MS: calculated  $C_{24}H_{21}NO_6S_3$   $[M+H]^+$ , 516.0604; Found 516.0601.

#### **(E)-(3-oxo-6-phenyl-2-tosylisoindolin-1-ylidene)methyl**

##### **4-methylbenzenesulfonate (4g)**

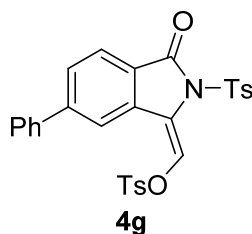

Following general procedure B using AgOTf as additive, **4g** was obtained in 62% yield (68 mg, 0.125mmol) as a white

solid after column chromatography (eluent = Petroleum ether/ dichloromethane 1:1 v/v).

$R_F$  (Petroleum ether/ dichloromethane 1:2): 0.38.

$^1H$  NMR (400 MHz,  $CDCl_3$ )  $\delta$  8.17 (d,  $J = 1.4$  Hz, 1H), 8.09 (s, 1H), 7.93 (dd,  $J = 14.9$ , 8.4 Hz, 4H), 7.81 (d,  $J = 8.0$  Hz, 1H), 7.67 (dd,  $J = 8.0$ , 1.5 Hz, 1H), 7.58 – 7.42 (m, 5H), 7.33 (t,  $J = 8.4$  Hz, 4H), 2.43 (s, 3H), 2.41 (s, 3H).

$^{13}C$  NMR (101 MHz,  $CDCl_3$ )  $\delta$  164.1, 148.1, 146.4, 145.9, 139.5, 135.2, 135.0, 132.0, 130.4, 129.9, 129.4, 129.2, 128.8, 128.3, 128.2, 127.5, 127.3, 126.5, 125.1, 125.0, 123.7, 21.8, 21.8.

ESI-MS: calculated  $C_{29}H_{23}NO_6S_2$   $[M+H]^+$ , 546.1040; Found 546.1034.

#### (E)-(3-oxo-2-tosyl-6-(trifluoromethyl)isoindolin-1-ylidene)methyl

##### 4-methylbenzenesulfonate (4h)

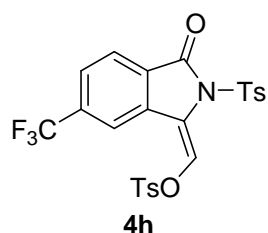

Following general procedure B using  $AgOTf$  as additive, **4h** was obtained in 68% yield (73.6 mg, 0.137 mmol) as a white solid after column chromatography (eluent = Petroleum ether/ dichloromethane 1:1 v/v).

$R_F$  (Petroleum ether/ dichloromethane 1:1): 0.4.

$^1H$  NMR (400 MHz,  $CDCl_3$ )  $\delta$  8.18 (d,  $J = 1.4$  Hz, 1H), 8.14 (s, 1H), 7.99 – 7.84 (m, 5H), 7.70 (dd,  $J = 8.1$ , 1.4 Hz, 1H), 7.36 (dd,  $J = 19.2$ , 8.1 Hz, 4H), 2.44 (s, 3H), 2.42 (s, 3H).

$^{13}C$  NMR (101 MHz,  $CDCl_3$ )  $\delta$  163.0, 146.7, 146.4, 136.3 (q,  $J = 32.8$  Hz), 134.8, 134.4, 131.8, 130.5, 130.1, 129.2, 128.4, 128.4, 128.3, 127.0 (q,  $J = 3.6$  Hz), 125.4, 123.2 (q,  $J = 273.4$  Hz), 122.3 (t,  $J = 4.1$  Hz), 21.8.

$^{19}F$  NMR (376 MHz,  $CDCl_3$ )  $\delta$  -62.94.

ESI-MS: calculated  $C_{24}H_{18}F_3NO_6S_2$   $[M+H]^+$ , 538.0600; Found 538.0588.

#### (E)-(6-cyano-3-oxo-2-tosylisoindolin-1-ylidene)methyl

##### 4-methylbenzenesulfonate (4i)

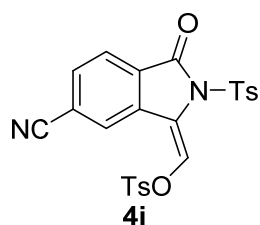

Following general procedure B using  $AgSbF_6$  as additive, **4i** was obtained in 62% yield (60.6 mg, 0.123 mmol) as a

white solid after column chromatography (eluent = Petroleum ether/ dichloromethane 1:1 v/v).

$R_F$  (Petroleum ether/ dichloromethane 1:2): 0.25.

$^1H$  NMR (400 MHz,  $CDCl_3$ )  $\delta$  8.22 (s, 1H), 8.15 (s, 1H), 7.93 (dd,  $J = 8.4, 3.0$  Hz, 4H), 7.87 (d,  $J = 7.9$  Hz, 1H), 7.71 (dd,  $J = 7.9, 1.3$  Hz, 1H), 7.43 (d,  $J = 8.1$  Hz, 2H), 7.34 (d,  $J = 8.1$  Hz, 2H), 2.47 (s, 3H), 2.42 (s, 3H).

$^{13}C$  NMR (101 MHz,  $CDCl_3$ )  $\delta$  162.6, 146.9, 146.5, 134.6, 134.4, 133.2, 131.6, 130.6, 130.1, 129.5, 129.1, 128.4, 128.3, 125.5, 124.4, 118.2, 117.4, 21.9, 21.9.

ESI-MS: calculated  $C_{24}H_{18}N_2O_6S_2$   $[M+H]^+$ , 495.0679; Found 495.0666.

#### (E)-3-oxo-2-tosyl-1-((tosyloxy)methylene)isoindoline-5-carboxylate (**4j**)

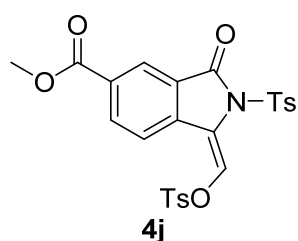

Following general procedure B using  $AgSbF_6$  as additive, **4j** was obtained in 66% yield (69.8 mg, 0.132 mmol) as a white solid after column chromatography (eluent = Petroleum ether/ dichloromethane 1:1 v/v).

$R_F$  (Petroleum ether/ dichloromethane 1:3): 0.33.

$^1H$  NMR (400 MHz,  $CDCl_3$ )  $\delta$  8.44 – 8.37 (m, 1H), 8.29 (dd,  $J = 8.2, 1.6$  Hz, 1H), 8.16 – 8.04 (m, 2H), 7.92 (dd,  $J = 8.4, 2.1$  Hz, 4H), 7.40 (d,  $J = 8.1$  Hz, 2H), 7.32 (d,  $J = 8.1$  Hz, 2H), 3.93 (s, 3H), 2.46 (s, 3H), 2.42 (s, 3H).

$^{13}C$  NMR (101 MHz,  $CDCl_3$ )  $\delta$  165.4, 163.5, 146.7, 146.2, 137.5, 135.6, 134.9, 132.0, 131.7, 130.6, 130.0, 128.8, 128.4, 128.4, 126.8, 126.1, 125.5, 125.4, 52.8, 21.9, 21.9.

ESI-MS: calculated  $C_{25}H_{21}NO_8S_2$   $[M+H]^+$ , 528.0781; Found 528.0771.

#### (E)-(3-oxo-2-tosyl-5-(trifluoromethyl)isoindolin-1-ylidene)methyl 4-methylbenzenesulfonate (**4k**)

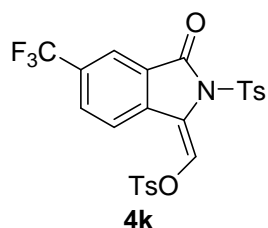

Following general procedure B using  $AgOTf$  as additive, **4k** was obtained in 65% yield (69.4 mg, 0.129 mmol) as a white solid after column chromatography (eluent = Petroleum ether/ dichloromethane 1:1 v/v).

$R_F$  (Petroleum ether/ dichloromethane 1:2): 0.46.

$^1\text{H}$  NMR (400 MHz,  $\text{CDCl}_3$ )  $\delta$  8.16 (d,  $J = 8.3$  Hz, 1H), 8.12 (s, 1H), 8.01 (d,  $J = 1.5$  Hz, 1H), 7.92 (d,  $J = 8.3$  Hz, 4H), 7.87 (dd,  $J = 8.4, 1.6$  Hz, 1H), 7.41 (d,  $J = 8.1$  Hz, 2H), 7.32 (d,  $J = 8.1$  Hz, 2H), 2.47 (s, 3H), 2.42 (s, 3H).

$^{13}\text{C}$  NMR (101 MHz,  $\text{CDCl}_3$ )  $\delta$  162.9, 146.7, 146.3, 136.8, 134.6, 132.4 (q,  $J = 33.6$  Hz), 131.5, 131.3 (q,  $J = 3.2$  Hz), 130.5, 129.9, 128.9, 128.3, 126.9, 125.9, 125.0, 123.1 (q,  $J = 272.8$  Hz), 122.0 (q,  $J = 4.0$  Hz), 21.8, 21.8.

$^{19}\text{F}$  NMR (376 MHz,  $\text{CDCl}_3$ )  $\delta$  -62.84.

ESI-MS: calculated  $\text{C}_{24}\text{H}_{18}\text{F}_3\text{NO}_6\text{S}_2$   $[\text{M}+\text{H}]^+$ , 538.0600; Found 538.0594.

### **(E)-(5-chloro-3-oxo-2-tosylisoindolin-1-ylidene)methyl**

#### **4-methylbenzenesulfonate (4l)**

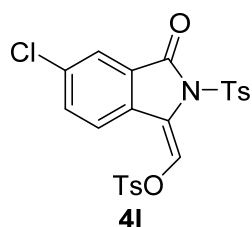

Following general procedure B using  $\text{AgSbF}_6$  as additive, **4l** was obtained in 65% yield (72.5 mg, 0.144 mmol) as a white solid after column chromatography (eluent = Petroleum ether/ dichloromethane 1:1 v/v).

$R_F$  (Petroleum ether/ dichloromethane 1:2): 0.56.

$^1\text{H}$  NMR (400 MHz,  $\text{CDCl}_3$ )  $\delta$  8.02 (s, 1H), 7.96 (d,  $J = 8.5$  Hz, 1H), 7.90 (d,  $J = 8.1$  Hz, 4H), 7.70 (d,  $J = 2.0$  Hz, 1H), 7.58 (dd,  $J = 8.4, 2.0$  Hz, 1H), 7.39 (d,  $J = 8.1$  Hz, 2H), 7.31 (d,  $J = 8.1$  Hz, 2H), 2.46 (s, 3H), 2.41 (s, 3H).

$^{13}\text{C}$  NMR (101 MHz,  $\text{CDCl}_3$ )  $\delta$  163.0, 146.6, 146.2, 136.6, 135.0, 134.8, 132.4, 131.6, 130.5, 130.0, 128.3, 128.3, 128.0, 127.7, 126.5, 125.5, 124.6, 21.9, 21.9.

ESI-MS: calculated  $\text{C}_{23}\text{H}_{18}\text{ClNO}_6\text{S}_2$   $[\text{M}+\text{H}]^+$ , 504.0337; Found 504.0324.

### **(E)-(5-iodo-3-oxo-2-tosylisoindolin-1-ylidene)methyl**

#### **4-methylbenzenesulfonate (4m)**

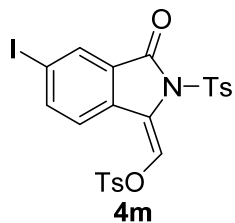

Following general procedure B using  $\text{AgSbF}_6$  as additive, **4m** was obtained in 67% yield (79.3 mg, 0.133 mmol) as a white solid after column chromatography (eluent = Petroleum ether/ dichloromethane 1:1 v/v).

$R_F$  (Petroleum ether/ dichloromethane 1:2): 0.38.

$^1\text{H}$  NMR (400 MHz,  $\text{CDCl}_3$ )  $\delta$  8.05 (d,  $J = 8.4$  Hz, 2H), 7.90 (ddd,  $J = 11.6, 8.4, 2.4$  Hz, 5H), 7.75 (d,  $J = 8.3$  Hz, 1H), 7.39 (d,  $J = 8.0$  Hz, 2H), 7.30 (d,  $J = 8.0$  Hz, 2H), 2.46 (s, 3H), 2.41 (s, 3H).

$^{13}\text{C}$  NMR (101 MHz,  $\text{CDCl}_3$ )  $\delta$  162.7, 146.6, 146.2, 143.5, 134.8, 133.6, 133.4, 131.6, 130.5, 130.0, 128.3, 128.3, 128.1, 127.9, 126.6, 125.7, 95.7, 21.9, 21.8.

ESI-MS: calculated  $\text{C}_{23}\text{H}_{18}\text{INO}_6\text{S}_2$   $[\text{M}+\text{H}]^+$ , 595.9693; Found 595.9684.

### (E)-(5-bromo-3-oxo-2-tosylisoindolin-1-ylidene)methyl

#### 4-methylbenzenesulfonate (4n)

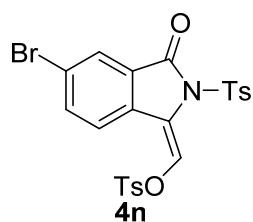

Following general procedure B using  $\text{AgSbF}_6$  as additive, **4n** was obtained in 77% yield (84.2 mg, 0.154 mmol) as a white solid after column chromatography (eluent = Petroleum ether/ dichloromethane 1:1 v/v).

$R_f$  (Petroleum ether/ dichloromethane 1:2): 0.61.

$^1\text{H}$  NMR (400 MHz,  $\text{CDCl}_3$ )  $\delta$  8.04 (s, 1H), 7.95 – 7.84 (m, 6H), 7.73 (dd,  $J = 8.4, 1.9$  Hz, 1H), 7.39 (d,  $J = 8.1$  Hz, 2H), 7.31 (d,  $J = 8.1$  Hz, 2H), 2.46 (s, 3H), 2.41 (s, 3H).

$^{13}\text{C}$  NMR (101 MHz,  $\text{CDCl}_3$ )  $\delta$  162.9, 146.6, 146.2, 137.8, 134.9, 132.9, 131.8, 130.5, 130.0, 128.3, 128.3, 128.2, 127.8, 127.6, 126.7, 125.6, 124.5, 21.9, 21.8.

ESI-MS: calculated  $\text{C}_{23}\text{H}_{18}\text{BrNO}_6\text{S}_2$   $[\text{M}+\text{H}]^+$ , 547.9832; Found 547.9821.

### (E)-(5-nitro-3-oxo-2-tosylisoindolin-1-ylidene)methyl

#### 4-methylbenzenesulfonate (4o)

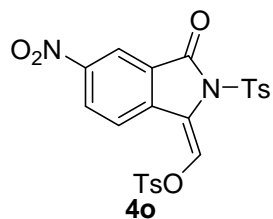

Following general procedure B using  $\text{AgSbF}_6$  as additive, **4o** was obtained in 51% yield (52.4 mg, 0.102 mmol) as a light yellow solid after column chromatography (eluent = Petroleum ether/ dichloromethane 1:1 v/v).

$R_f$  (Petroleum ether/ dichloromethane 1:2): 0.33.

$^1\text{H}$  NMR (400 MHz,  $\text{CDCl}_3$ )  $\delta$  8.58 (d,  $J = 2.1$  Hz, 1H), 8.47 (dd,  $J = 8.6, 2.2$  Hz, 1H), 8.20 (d,  $J = 9.7$  Hz, 2H), 7.98 – 7.88 (m, 4H), 7.43 (d,  $J = 8.1$  Hz, 2H), 7.34 (d,  $J = 8.2$  Hz, 2H), 2.48 (s, 3H), 2.43 (s, 3H).

$^{13}\text{C}$  NMR (101 MHz,  $\text{CDCl}_3$ )  $\delta$  162.3, 148.7, 147.0, 146.6, 138.6, 134.5, 131.5, 130.7, 130.2, 130.1, 129.3, 128.5, 128.4, 127.7, 126.4, 124.6, 120.3, 22.0, 21.9.

ESI-MS: calculated  $C_{23}H_{18}N_2O_8S_2$   $[M+H]^+$ , 515.0577; Found 515.0570.

**(E)-(5-(dimethylamino)-3-oxo-2-tosylisoindolin-1-ylidene)methyl**

**4-methylbenzenesulfonate (4p)**

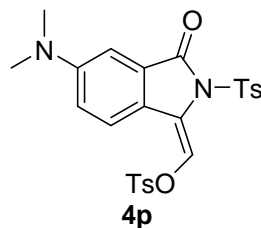

Following general procedure B using  $AgSbF_6$  as additive, **4p** was obtained in 37% yield (37.6 mg, 0.074 mmol) as a yellow-green solid after column chromatography (eluent = Petroleum ether/ dichloromethane 1:1 v/v).

$R_F$  (Petroleum ether/ dichloromethane 1:2): 0.27.

$^1H$  NMR (400 MHz,  $CDCl_3$ )  $\delta$  7.99 – 7.74 (m, 6H), 7.36 (d,  $J$  = 8.0 Hz, 2H), 7.31 – 7.22 (m, 2H), 6.95 – 6.80 (m, 2H), 2.99 (s, 6H), 2.44 (s, 3H), 2.40 (s, 3H).

$^{13}C$  NMR (101 MHz,  $CDCl_3$ )  $\delta$  165.3, 151.6, 146.0, 145.6, 135.4, 132.0, 130.3, 129.8, 128.4, 128.2, 127.9, 127.4, 126.2, 124.2, 122.0, 118.6, 105.3, 40.4, 21.9, 21.8.

ESI-MS: calculated  $C_{25}H_{24}N_2O_6S_2$   $[M+H]^+$ , 513.1149; Found 513.1141.

**(E)-(4-methoxy-3-oxo-2-tosylisoindolin-1-ylidene)methyl**

**4-methylbenzenesulfonate (4q)**

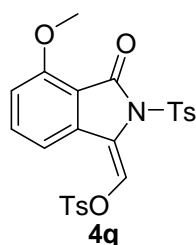

Following general procedure B using  $AgSbF_6$  as additive, **4q** was obtained in 32% yield (31.7 mg, 0.064 mmol) as a white solid after column chromatography (eluent = dichloromethane).

$R_F$  (Petroleum ether/ dichloromethane 1:2): 0.10.

$^1H$  NMR (400 MHz,  $CDCl_3$ )  $\delta$  8.02 (s, 1H), 7.90 (d,  $J$  = 8.0 Hz, 4H), 7.67 – 7.49 (m, 2H), 7.37 (d,  $J$  = 8.1 Hz, 2H), 7.27 (d,  $J$  = 8.3 Hz, 2H), 6.89 (d,  $J$  = 8.1 Hz, 1H), 3.89 (s, 3H), 2.45 (s, 3H), 2.39 (s, 3H).

$^{13}C$  NMR (101 MHz,  $CDCl_3$ )  $\delta$  162.6, 158.3, 146.4, 145.7, 136.6, 136.3, 135.2, 131.8, 130.4, 129.8, 128.4, 128.4, 127.2, 125.8, 117.3, 113.5, 112.2, 56.2, 21.9, 21.8.

ESI-MS: calculated  $C_{24}H_{21}NO_7S_2$   $[M+H]^+$ , 500.0828; Found 500.0832.

**(E)-(4-methyl-3-oxo-2-tosylisoindolin-1-ylidene)methyl**

**4-methylbenzenesulfonate (4r)**

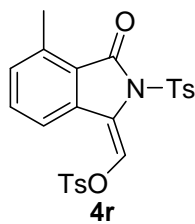

Following general procedure B using AgSbF<sub>6</sub> as additive, **4r** was obtained in 28% yield (27.5 mg, 0.056 mmol) as a white solid after column chromatography (eluent = Petroleum ether/dichloromethane 1:1 v/v).

R<sub>F</sub> (Petroleum ether/ dichloromethane 1:3): 0.41.

<sup>1</sup>H NMR (400 MHz, CDCl<sub>3</sub>) δ 8.01 (s, 1H), 7.89 (t, *J* = 9.3 Hz, 5H), 7.49 (t, *J* = 7.7 Hz, 1H), 7.38 (d, *J* = 8.2 Hz, 2H), 7.31 (d, *J* = 8.1 Hz, 2H), 7.21 (d, *J* = 7.6 Hz, 1H), 2.56 (s, 3H), 2.45 (s, 3H), 2.42 (s, 3H).

<sup>13</sup>C NMR (101 MHz, CDCl<sub>3</sub>) δ 164.8, 146.3, 145.8, 139.4, 135.3, 134.8, 134.3, 132.3, 131.9, 130.4, 129.9, 128.4, 128.3, 126.7, 126.0, 123.7, 122.9, 21.9, 21.9, 17.9.

ESI-MS: calculated C<sub>24</sub>H<sub>21</sub>NO<sub>6</sub>S<sub>2</sub> [M+H]<sup>+</sup>, 484.0883; Found 484.0872.

## ii. Synthesis and characterization of compound 5

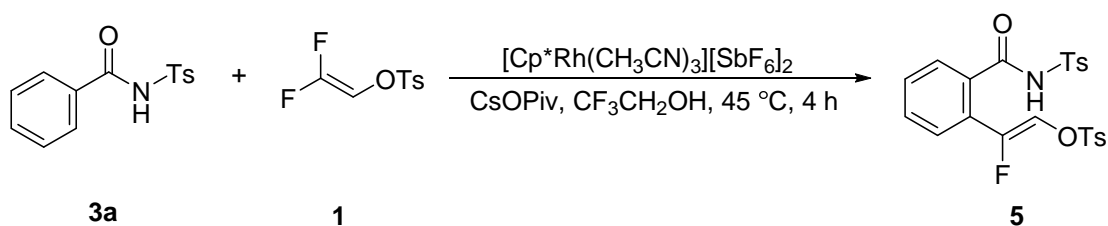

To an oven-dried Schlenk tube charged with a stirring bar, were added *N*-tosylbenzamide **3** (0.2 mmol, 1.0 equiv), 2,2-difluorovinyl tosylate **1** (70.2 mg, 0.3 mmol, 1.5 equiv), [Cp<sup>\*</sup>Rh(CH<sub>3</sub>CN)<sub>3</sub>][SbF<sub>6</sub>]<sub>2</sub> (8.3 mg, 0.01 mmol, 5 mol %) and CsOPiv (47.0 mg, 0.2 mmol, 1.0 equiv) in the glove box. The tube was then moved out and 2,2,2-trifluoroethanol (TFE) (1.0 mL) was added under N<sub>2</sub>. The mixture was stirred at 45 °C for 4 h. The reaction mixture was diluted with dichloromethane and the volatiles were removed under reduced pressure. The pure product was obtained by flash chromatography (silica gel; petroleum ether/dichloromethane).

Compound **5** was obtained as dark red viscous oil (210.5 mg, 0.448 mmol, 86%).

R<sub>F</sub> (Petroleum ether/ethyl ether /AcOH 2v/1v/1d): 0.29.

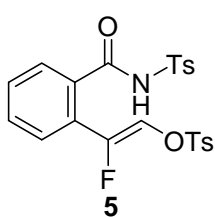

$^1\text{H}$  NMR (400 MHz,  $\text{CDCl}_3$ )  $\delta$  9.31 (s, 1H), 7.90 (d,  $J$  = 8.1 Hz, 2H), 7.86 – 7.79 (m, 2H), 7.59 – 7.23 (m, 9H), 2.46 (d,  $J$  = 2.1 Hz, 6H).

$^{13}\text{C}$  NMR (101 MHz,  $\text{CDCl}_3$ )  $\delta$  165.4,  $\delta$  149.8 (d,  $J$  = 258.2 Hz), 146.0, 145.5, 135.0, 132.4,  $\delta$  132.2 (d,  $J$  = 35.2 Hz), 132.1, 131.6,

130.7, 130.3, 130.2, 129.8, 129.7, 128.9 (d,  $J$  = 4.3 Hz), 128.3, 128.2, 126.4, 120.8 (d,  $J$  = 13.4 Hz), 21.9, 21.8.

$^{19}\text{F}$  NMR (376 MHz,  $\text{CDCl}_3$ )  $\delta$  -115.45.

ESI-MS: calculated  $\text{C}_{23}\text{H}_{20}\text{FNO}_6\text{S}_2$   $[\text{M}+\text{H}]^+$ , 490.0789; Found 490.0801.

## IV. Synthesis and characterization of 3-alkylidene isobenzofuranones and compound 8

### i. Synthesis and characterization of 3-alkylidene isobenzofuranones

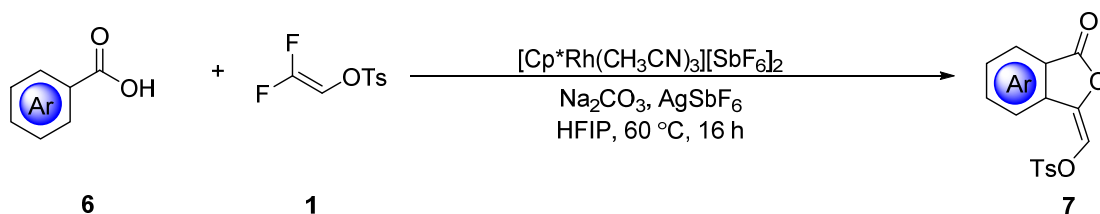

**General procedure C:** To an oven-dried Schlenk tube charged with a stirring bar, were added acid **6** (0.2 mmol, 1.0 equiv), 2,2-difluorovinyl 4-methylbenzenesulfonate **1** (70.2 mg, 0.3 mmol, 1.5 equiv),  $[\text{Cp}^*\text{Rh}(\text{CH}_3\text{CN})_3][\text{SbF}_6]_2$  (8.3 mg, 0.01 mmol, 5 mol %),  $\text{AgSbF}_6$  (6.9 mg, 0.02 mmol, 10 mol %) and  $\text{Na}_2\text{CO}_3$  (21.0 mg, 0.2 mmol 1.0 equiv) in the glove box. Then the tube was then transferred out and 1,1,1,3,3,3-hexafluoro-2-propanol (HFIP) (1.0 mL) was added. The mixture was stirred at 60 °C for 16 h. The crude reaction was diluted with dichloromethane, the volatiles were removed and the



analytically pure product was obtained by flash chromatography (silica; petroleum ether/EtOAc).

**(E)-(3-oxoisobenzofuran-1(3H)-ylidene)methyl 4-methylbenzenesulfonate (7a)**

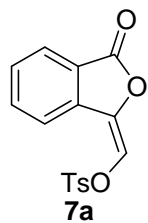

Following general procedure C, **7a** was obtained in 75% yield (47.4 mg, 0.150 mmol) as a white solid after column chromatography (eluent = Petroleum ether/ EtOAc 8:1 v/v).

$R_f$  (Petroleum ether/ EtOAc 8:1): 0.21.

$^1\text{H}$  NMR (400 MHz,  $\text{CDCl}_3$ )  $\delta$  7.86 (dd,  $J = 7.9, 5.0$  Hz, 4H), 7.69 (t,  $J = 7.6$  Hz, 1H), 7.54 (t,  $J = 7.5$  Hz, 1H), 7.34 (d,  $J = 8.0$  Hz, 2H), 7.11 (s, 1H), 2.40 (s, 3H).

$^{13}\text{C}$  NMR (101 MHz,  $\text{CDCl}_3$ )  $\delta$  165.8, 146.4, 142.1, 136.2, 135.0, 131.5, 130.9, 130.3, 128.2, 125.6, 124.4, 123.9, 123.5, 21.7.

ESI-MS: calculated  $\text{C}_{16}\text{H}_{12}\text{O}_5\text{S}$   $[\text{M}+\text{H}]^+$ , 317.0478; Found 317.0471.

**(E)-(6-methyl-3-oxoisobenzofuran-1(3H)-ylidene)methyl 4-methylbenzenesulfonate (7b)**

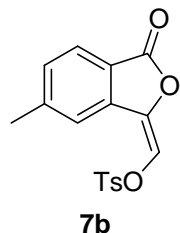

Following general procedure C, **7b** was obtained in 82% yield (54.0 mg, 0.164 mmol) as a white solid after column chromatography (eluent = Petroleum ether/ EtOAc 8:1 v/v).

$R_f$  (Petroleum ether/ EtOAc 8:1): 0.22.

$^1\text{H}$  NMR (400 MHz,  $\text{CDCl}_3$ )  $\delta$  7.87 (d,  $J = 8.1$  Hz, 2H), 7.75 (d,  $J = 7.8$  Hz, 1H), 7.63 (s, 1H), 7.36 (d,  $J = 7.9$  Hz, 3H), 7.07 (s, 1H), 2.48 (s, 3H), 2.42 (s, 3H).

$^{13}\text{C}$  NMR (101 MHz,  $\text{CDCl}_3$ )  $\delta$  165.9, 146.5, 146.4, 142.3, 136.8, 132.2, 131.7, 130.4, 128.4, 125.4, 124.2, 123.4, 122.1, 22.3, 21.9.

ESI-MS: calculated  $\text{C}_{17}\text{H}_{14}\text{O}_5\text{S}$   $[\text{M}+\text{H}]^+$ , 331.0635; Found 331.0638.

**(E)-(6-methoxy-3-oxoisobenzofuran-1(3H)-ylidene)methyl 4-methylbenzenesulfonate (7c)**

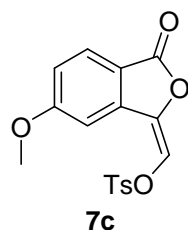

Following general procedure C, **7c** was obtained in 82% yield (51.9 mg, 0.150 mmol) as a white solid after column chromatography (eluent = Petroleum ether/ EtOAc 8:1 v/v).

$R_f$  (Petroleum ether/ EtOAc 4:1): 0.23.

$^1\text{H}$  NMR (400 MHz,  $\text{CDCl}_3$ )  $\delta$  7.86 (d,  $J$  = 8.1 Hz, 2H), 7.77 (d,  $J$  = 8.5 Hz, 1H), 7.36 (d,  $J$  = 8.0 Hz, 2H), 7.29 (d,  $J$  = 2.1 Hz, 1H), 7.06 (q,  $J$  = 3.1, 2.1 Hz, 2H), 3.90 (s, 3H), 2.43 (s, 3H).

$^{13}\text{C}$  NMR (101 MHz,  $\text{CDCl}_3$ )  $\delta$  165.6, 165.3, 146.5, 142.2, 138.8, 131.7, 130.4, 128.3, 127.2, 123.5, 119.0, 117.0, 107.3, 56.1, 21.9.

ESI-MS: calculated  $\text{C}_{17}\text{H}_{14}\text{O}_6\text{S}$   $[\text{M}+\text{H}]^+$ , 347.0584; Found 347.0578.

### (E)-(3-oxo-6-phenylisobenzofuran-1(3H)-ylidene)methyl

#### 4-methylbenzenesulfonate (7d)

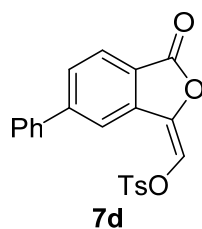

**7d**

Following general procedure C, **7d** was obtained in 53% yield (41.2 mg, 0.106 mmol) as a white solid after column chromatography (eluent = Petroleum ether/ EtOAc 8:1 v/v).

$R_f$  (Petroleum ether/ EtOAc 8:1 ): 0.22.

$^1\text{H}$  NMR (400 MHz,  $\text{CDCl}_3$ )  $\delta$  7.97 (s, 1H), 7.94 (d,  $J$  = 8.0 Hz, 1H), 7.87 (d,  $J$  = 8.1 Hz, 2H), 7.76 (d,  $J$  = 8.0 Hz, 1H), 7.53 (ddd,  $J$  = 19.2, 13.7, 7.1 Hz, 5H), 7.30 (d,  $J$  = 8.0 Hz, 2H), 7.16 (s, 1H), 2.39 (s, 3H).

$^{13}\text{C}$  NMR (101 MHz,  $\text{CDCl}_3$ )  $\delta$  165.8, 148.5, 146.5, 142.4, 139.3, 137.1, 131.8, 130.4, 130.2, 129.3, 129.1, 128.3, 127.7, 126.0, 123.7, 123.2, 122.3, 21.9.

ESI-MS: calculated  $\text{C}_{22}\text{H}_{16}\text{O}_5\text{S}$   $[\text{M}+\text{H}]^+$ , 393.0791; Found 393.0788.

### (E)-(6-bromo-3-oxoisobenzofuran-1(3H)-ylidene)methyl

#### 4-methylbenzenesulfonate (7e)

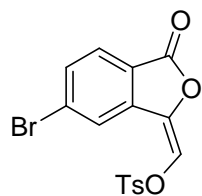

**7e**

Following general procedure C, **7e** was obtained in 63% yield (49.6 mg, 0.126 mmol) as a white solid after column chromatography (eluent = Petroleum ether/ EtOAc 8:1 v/v).

$R_f$  (Petroleum ether/ EtOAc 8:1): 0.22 .

$^1\text{H}$  NMR (400 MHz,  $\text{CDCl}_3$ )  $\delta$  7.93 (s, 1H), 7.88 (d,  $J$  = 8.1 Hz, 2H), 7.74 (d,  $J$  = 8.1 Hz, 1H), 7.68 (dd,  $J$  = 8.2, 1.5 Hz, 1H), 7.38 (d,  $J$  = 8.0 Hz, 2H), 7.17 (s, 1H), 2.44 (s, 3H).

$^{13}\text{C}$  NMR (101 MHz,  $\text{CDCl}_3$ )  $\delta$  165.0, 146.7, 140.8, 137.8, 134.4, 131.6, 130.5, 130.3, 128.4, 127.0, 126.9, 124.6, 123.3, 21.9.

ESI-MS: calculated  $\text{C}_{16}\text{H}_{11}\text{BrO}_5\text{S}$   $[\text{M}+\text{H}]^+$ , 394.9583; Found 394.9550.

**(E)-(6-iodo-3-oxoisobenzofuran-1(3H)-ylidene)methyl**

**4-methylbenzenesulfonate (7f)**

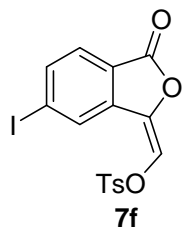

Following general procedure C, **7f** was obtained in 49% yield (43 mg, 0.098 mmol) as a white solid after column chromatography (eluent = Petroleum ether/ EtOAc 8:1 v/v).

$R_F$  (Petroleum ether/ EtOAc 8:1): 0.28.

$^1H$  NMR (400 MHz,  $CDCl_3$ )  $\delta$  8.12 (s, 1H), 7.88 (t,  $J = 6.6$  Hz, 3H), 7.58 (d,  $J = 8.1$  Hz, 1H), 7.38 (d,  $J = 8.0$  Hz, 2H), 7.16 (s, 1H), 2.43 (s, 3H).

$^{13}C$  NMR (101 MHz,  $CDCl_3$ )  $\delta$  165.3, 146.7, 140.7, 140.1, 137.6, 132.9, 131.5, 130.5, 128.3, 126.7, 124.5, 123.8, 102.9, 21.9.

ESI-MS: calculated  $C_{16}H_{11}IO_5S$   $[M+H]^+$ , 442.9445; Found 442.9456.

**(E)-(5-methyl-3-oxoisobenzofuran-1(3H)-ylidene)methyl**

**4-methylbenzenesulfonate (7g)**

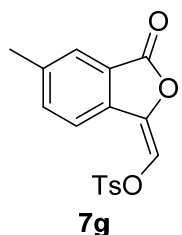

Following general procedure C, **7g** was obtained in 60% yield (39.7 mg, 0.120 mmol) as a white solid after column chromatography (eluent = Petroleum ether/ EtOAc 8:1 v/v).

$R_F$  (Petroleum ether/ EtOAc 8:1): 0.21.

$^1H$  NMR (400 MHz,  $CDCl_3$ )  $\delta$  7.85 (d,  $J = 8.0$  Hz, 2H), 7.76 (d,  $J = 8.0$  Hz, 1H), 7.66 (s, 1H), 7.50 (d,  $J = 8.0$  Hz, 1H), 7.34 (d,  $J = 8.0$  Hz, 2H), 7.05 (s, 1H), 2.46 (s, 3H), 2.42 (s, 3H).

$^{13}C$  NMR (101 MHz,  $CDCl_3$ )  $\delta$  166.0, 146.4, 142.5, 141.8, 136.2, 133.9, 131.7, 130.4 (2C), 128.4 (2C), 125.6, 124.8, 123.8, 122.8, 21.8, 21.7.

ESI-MS: calculated  $C_{17}H_{14}O_5S$   $[M+H]^+$ , 331.0635; Found 331.0631.

**(E)-(4-methyl-3-oxoisobenzofuran-1(3H)-ylidene)methyl**

**4-methylbenzenesulfonate (7h)**

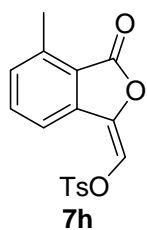

Following general procedure C, **7h** was obtained in 40% yield (26.4mg, 0.080mmol) as a white solid after column chromatography (eluent = Petroleum ether/ EtOAc 8:1 v/v).

$R_F$  (Petroleum ether/ EtOAc 8:1): 0.28.

$^1\text{H}$  NMR (400 MHz,  $\text{CDCl}_3$ )  $\delta$  7.87 (t,  $J$  = 8.2 Hz, 2H), 7.71 (d,  $J$  = 7.7 Hz, 1H), 7.56 (q,  $J$  = 7.9 Hz, 1H), 7.34 (dt,  $J$  = 14.8, 7.7 Hz, 3H), 7.08 (s, 1H), 2.65 (s, 3H), 2.42 (s, 3H).

$^{13}\text{C}$  NMR (101 MHz,  $\text{CDCl}_3$ )  $\delta$  166.1, 146.4, 142.1, 139.9, 136.7, 134.8, 132.6, 131.7, 130.4, 128.4, 123.2, 122.2, 121.6, 21.9, 17.5.

$^{13}\text{C}$  NMR (101 MHz,  $\text{CDCl}_3$ )  $\delta$  166.1, 146.4, 142.0, 139.9, 136.6, 134.7, 132.6, 131.6, 130.4, 128.3, 123.1, 122.1, 121.6, 21.9, 17.5.

ESI-MS: calculated  $\text{C}_{17}\text{H}_{14}\text{O}_5\text{S}$   $[\text{M}+\text{H}]^+$ , 331.0635; Found 331.0627.

### (E)-(4-methoxy-3-oxoisobenzofuran-1(3H)-ylidene)methyl

#### 4-methylbenzenesulfonate (7i)

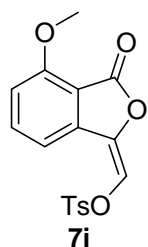

Following general procedure C, **7i** was obtained in 57% yield (39.2mg, 0.114mmol) as a white solid after column chromatography (eluent = Petroleum ether/ EtOAc 8:1 v/v).

$R_f$  (Petroleum ether/ EtOAc 2:1): 0.40.

$^1\text{H}$  NMR (400 MHz,  $\text{CDCl}_3$ )  $\delta$  7.84 (d,  $J$  = 7.9 Hz, 2H), 7.62 (t,  $J$  = 8.3 Hz, 1H), 7.43 (d,  $J$  = 7.7 Hz, 1H), 7.34 (d,  $J$  = 7.9 Hz, 2H), 7.07 (s, 1H), 6.97 (d,  $J$  = 8.3 Hz, 1H), 3.97 (s, 3H), 2.41 (s, 3H).

$^{13}\text{C}$  NMR (101 MHz,  $\text{CDCl}_3$ )  $\delta$  163.8, 158.4, 146.4, 141.7, 138.4, 137.3, 131.6, 130.3, 128.3, 123.6, 115.9, 112.7, 111.7, 56.3, 21.8.

ESI-MS: calculated  $\text{C}_{17}\text{H}_{14}\text{O}_6\text{S}$   $[\text{M}+\text{H}]^+$ , 347.0584; Found 347.0576.

## ii. Synthesis and characterization of compound 8

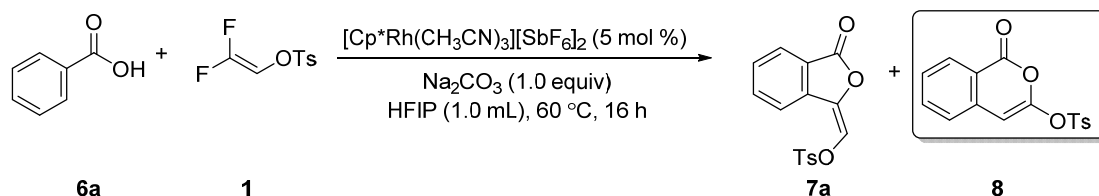

In an oven-dried Schlenk tube with a stirring bar, acid **6a** (0.2 mmol, 1.0 equiv), 2,2-difluorovinyl 4-methylbenzenesulfonate **1** (70.2 mg, 0.3 mmol, 1.5 equiv) and  $[\text{Cp}^*\text{Rh}(\text{CH}_3\text{CN})_3][\text{SbF}_6]_2$  (8.3 mg, 0.01 mmol, 5 mol %),  $\text{Na}_2\text{CO}_3$  (21.0 mg, 0.2

mmol 1.0 equiv) and 1,1,1,3,3,3-hexafluoro-2-propanol (HFIP) (1.0 mL) were added under air. The mixture was stirred at 60 °C for 16 h. The crude reaction was diluted with dichloromethane, the volatiles were removed and the analytically pure product **8** was obtained by flash chromatography (silica; petroleum ether/EtOAc).

To an oven-dried Schlenk tube charged with a stirring bar, were added acid **6** (0.2 mmol, 1.0 equiv), 2,2-difluorovinyl 4-methylbenzenesulfonate **1** (70.2 mg, 0.3 mmol, 1.5 equiv), [Cp\*Rh(CH<sub>3</sub>CN)<sub>3</sub>][SbF<sub>6</sub>]<sub>2</sub> (8.3 mg, 0.01 mmol, 5 mol %) and Na<sub>2</sub>CO<sub>3</sub> (21.0 mg, 0.2 mmol 1.0 equiv) in the glove box. Then the tube was then transferred out and 1,1,1,3,3,3-hexafluoro-2-propanol (HFIP) (1.0 mL) was added. The mixture was stirred at 60 °C for 16 h. The crude reaction was diluted with dichloromethane, the volatiles were removed and the analytically pure product **8** was obtained by flash chromatography (silica; petroleum ether/EtOAc).

### 1-oxo-1H-isochromen-3-yl 4-methylbenzenesulfonate (**8**)

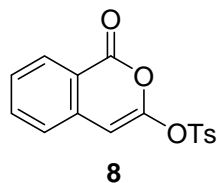

Compound **8** was obtained in 18% yield as a white solid after column chromatography (eluent = Petroleum ether/ EtOAc 16:1 v/v).

$R_F$  (Petroleum ether/ EtOAc 8:1): 0.40.

<sup>1</sup>H NMR (400 MHz, CDCl<sub>3</sub>) δ 7.97 – 7.82 (m, 3H), 7.77 – 7.66 (m, 1H), 7.62 – 7.52 (m, 2H), 7.36 (d, *J* = 8.1 Hz, 2H), 6.95 (s, 1H), 2.44 (s, 3H).

<sup>13</sup>C NMR (101 MHz, CDCl<sub>3</sub>) δ 165.4, 146.2, 137.8, 137.7, 134.9, 132.2, 130.6, 130.2, 128.3, 126.1, 124.0, 119.6, 116.7, 21.9.

## V. Derivatization of 3-alkylidene isoindolinone 4a

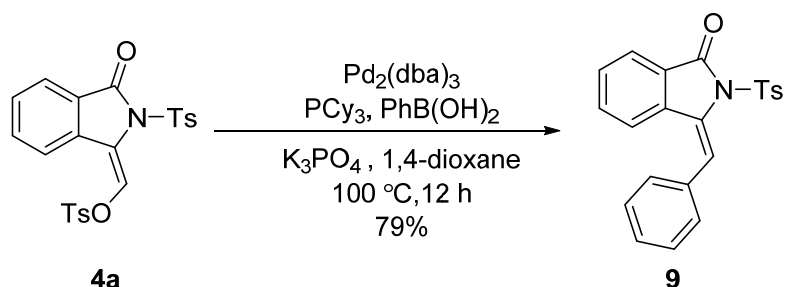

### (E)-3-benzylidene-2-tosylisoindolin-1-one (**9**)<sup>4</sup>

To a 10.0 mL of sealed tube charged with **4a** (52.9 mg, 0.1 mmol, 1.0 equiv), were added  $\text{PCy}_3$  (2.8 mg, 10 mmol %), (4-methoxyphenyl)boronic acid (41.4 mg, 3.0 equiv),  $\text{Pd}_2\text{dba}_3$  (4 mg, 5 mol %) and  $\text{K}_3\text{PO}_4$  (36 mg, 1.7 equiv) in the glove box. The tube was then removed out and 1,4-dioxane (1.0 mL) was added under Ar. The reaction mixture was stirred at 100 °C for 12 h. After that, the resulting mixture was cooled to room temperature and concentrated *in vacuo*. The residue was purified with flash column chromatography (Petroleum ether/EtOAc 3:1 v/v).

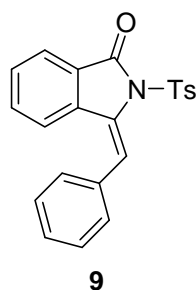

Compound **9** was obtained in 79% yield (30.0 mg, 0.079 mmol) as a white solid after column chromatography.

$R_f$  (Petroleum ether/ EtOAc 4:1): 0.30.

$^1\text{H}$  NMR (400 MHz,  $\text{CDCl}_3$ )  $\delta$  8.06 (s, 1H), 8.03 (d,  $J = 5.2$  Hz, 2H), 7.78 (d,  $J = 7.6$  Hz, 1H), 7.50 – 7.33 (m, 8H), 7.33 – 7.27 (m, 1H),

6.98 (d,  $J = 8.0$  Hz, 1H), 2.43 (s, 3H).

$^{13}\text{C}$  NMR (101 MHz,  $\text{CDCl}_3$ )  $\delta$  165.2, 145.5, 136.4, 136.1, 135.4, 133.8, 133.5, 129.9, 129.7, 129.1, 129.1, 128.4, 128.2, 127.6, 124.5, 124.1, 118.2, 21.8.

ESI-MS: calculated  $\text{C}_{22}\text{H}_{17}\text{NO}_3\text{S}$   $[\text{M}+\text{H}]^+$ , 376.1002; Found 376.0995.

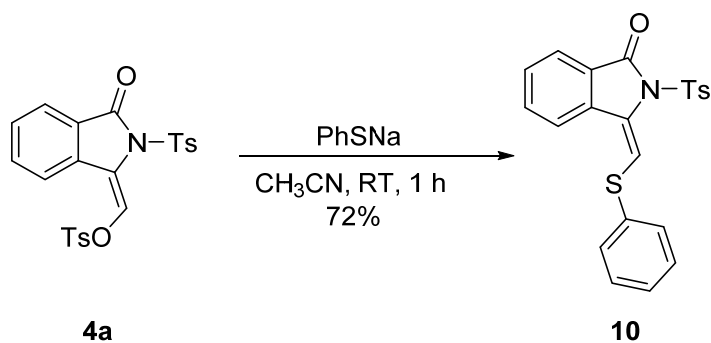

### (E)-3-((phenylthio)methylene)-2-tosylisoindolin-1-one (10)

To a 10.0 mL tube charged with a stirring bar, were added **4a** (15 mg, 0.032 mmol, 1.0 equiv), PhSNa (10.6 mg, 0.08 mmol, 2.5 equiv) and CH<sub>3</sub>CN (1.0 mL). The vial was sealed with a PTFE lined cap and stirred at room temperature for 1 h. The solvent was then removed in *vacuo* and the residue was further purified with flash column chromatography (Petroleum ether/ EtOAc 6:1 v/v) to give the titled compound as a yellow-green solid (9.4 mg, 72%).

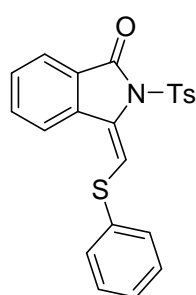

R<sub>f</sub> (Petroleum ether/ EtOAc 4:1): 0.42.

<sup>1</sup>H NMR (400 MHz, CDCl<sub>3</sub>) δ 8.30 (d, *J* = 8.0 Hz, 1H), 7.97 (d, *J* = 8.1 Hz, 2H), 7.91 (s, 1H), 7.86 (d, *J* = 7.7 Hz, 1H), 7.72 (t, *J* = 7.7 Hz, 1H), 7.53 (d, *J* = 7.2 Hz, 2H), 7.49 (t, *J* = 7.6 Hz, 1H), 7.43 (t, *J* = 7.5 Hz, 2H), 7.39 – 7.35 (m, 1H), 7.32 (d, *J* = 8.1 Hz, 2H), 2.41 (s, 3H).

<sup>13</sup>C NMR (101 MHz, CDCl<sub>3</sub>) δ 164.7, 145.6, 136.1, 135.9, 134.8, 134.4, 129.9, 129.7, 129.3, 129.3, 128.3, 127.9, 126.9, 124.9, 124.8, 115.8, 21.9.

ESI-MS: calculated C<sub>22</sub>H<sub>17</sub>NO<sub>3</sub>S<sub>2</sub> [M+H]<sup>+</sup>, 408.0723; Found 408.0717.

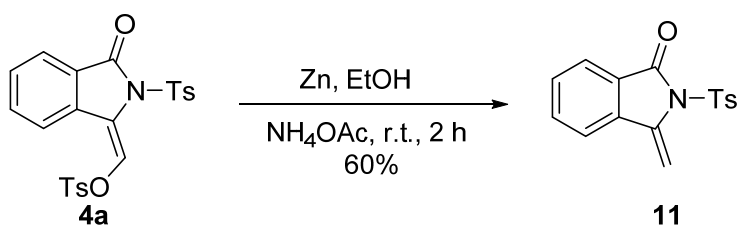

### 3-methylene-2-tosylisoindolin-1-one (11)

To a 10.0 mL tube charged with **4a** (15 mg, 0.032 mmol, 1.0 equiv), Zn (56 mg, 0.896 mmol, 28.0 equiv) and EtOH (0.5 mL), was added a solution of NH<sub>4</sub>OAc (0.3 mL, 1M). The vial was sealed with a PTFE lined cap and stirred at room

temperature for 2 h. The solvent was then removed in *vacuo* and the residue was further purified with flash column chromatography (Petroleum ether/ EtOAc 3:1 v/v) to give the titled compound as a white solid (5.7 mg, 60%).

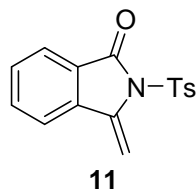

$R_F$  (Petroleum ether/ EtOAc 3:1): 0.50.

$^1\text{H NMR}$  (400 MHz,  $\text{CDCl}_3$ )  $\delta$  8.00 (d,  $J = 8.3$  Hz, 2H), 7.79 (d,  $J = 7.7$  Hz, 1H), 7.73 – 7.58 (m, 2H), 7.54 – 7.40 (m, 1H), 7.32 (d,  $J = 8.1$  Hz, 2H), 6.20 (d,  $J = 2.1$  Hz, 1H), 5.54 (d,  $J = 2.2$  Hz, 1H), 2.41 (s, 3H).

$^{13}\text{C NMR}$  (101 MHz,  $\text{CDCl}_3$ )  $\delta$  165.1, 145.5, 138.1, 137.6, 135.9, 134.3, 130.2, 129.9, 128.2, 126.5, 124.5, 120.2, 96.8, 21.8.

ESI-MS: calculated  $\text{C}_{16}\text{H}_{13}\text{NO}_3\text{S}$   $[\text{M}+\text{H}]^+$ , 300.0689; Found 300.0683

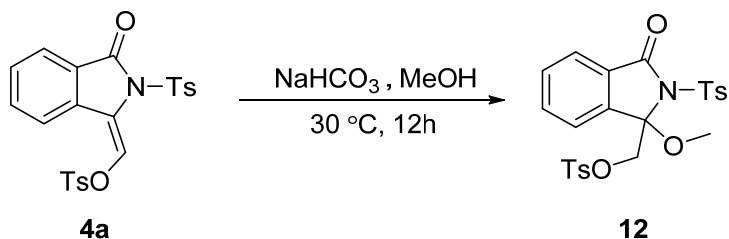

**(1-methoxy-3-oxo-2-tosylisoindolin-1-yl)methyl 4-methylbenzenesulfonate (12)**

To a 10.0 mL tube charged with **4a** (15.0 mg, 0.032 mmol, 1.0 equiv),  $\text{NaHCO}_3$  (21.0 mg, 0.256 mmol, 8.0 equiv), was added MeOH (1.0 mL). The tube was sealed with a PTFE lined cap and stirred at 30 °C for 12 h. The solvent was removed in *vacuo* and the residue was further purified with flash column chromatography (Petroleum ether/ EtOAc 3:1 v/v) to give the titled compound as a white solid (16.1 mg, 96%).

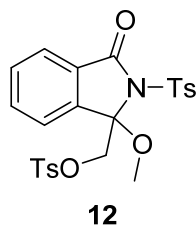

$R_F$  (Petroleum ether/ EtOAc 2:1): 0.29.

$^1\text{H NMR}$  (400 MHz,  $\text{CDCl}_3$ )  $\delta$  8.05 (d,  $J = 8.2$  Hz, 2H), 7.75 (d,  $J = 7.5$  Hz, 1H), 7.63 – 7.58 (m, 1H), 7.53 (dd,  $J = 9.7, 7.9$  Hz, 3H), 7.33 (dd,  $J = 7.8, 5.7$  Hz, 3H), 7.25 (d,  $J = 6.9$  Hz, 2H), 4.96 (d,  $J = 10.1$  Hz, 1H), 4.74 (d,  $J = 10.1$  Hz, 1H), 2.91 (s, 3H), 2.44 (s, 3H), 2.42 (s, 3H).

$^{13}\text{C NMR}$  (101 MHz,  $\text{CDCl}_3$ )  $\delta$  165.3, 145.5, 145.3, 141.0, 135.8, 134.7, 132.3, 131.2, 130.0, 129.8, 129.5, 129.2, 128.0, 124.9, 123.1, 96.9, 69.4, 51.8, 21.9.



ESI-MS: calculated  $C_{24}H_{23}NO_7S_2$   $[M+Na]^+$ , 524.0808; Found 524.0815.

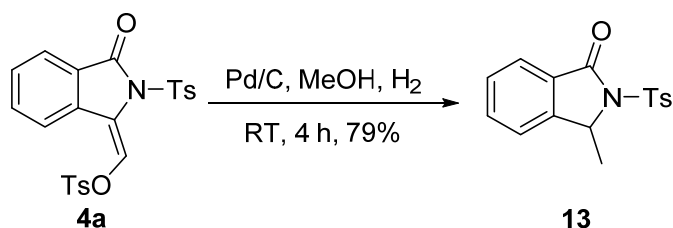

### 3-methyl-2-tosylisindolin-1-one (**13**)

To a 10.0 mL tube charged with **4a** (15 mg, 0.032 mmol), were added Pd/C (3.6 mg, 0.006 mmol, 20 mol%) and MeOH (0.5 mL). The tube was evacuated and refilled with hydrogen for three times. The suspension was stirred at room temperature for 4 h and then filtered through a pad of Celite and concentrated. The residue was purified with flash column chromatography (Petroleum ether/EtOAc 7:1 v/v) to give the titled compound as a white solid (7.6 mg, 79%).

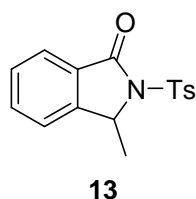

$R_f$  (Petroleum ether/ EtOAc 6:1): 0.49.

$^1\text{H NMR}$  (400 MHz,  $\text{CDCl}_3$ )  $\delta$  8.03 (d,  $J = 8.0$  Hz, 2H), 7.78 (d,  $J = 7.7$  Hz, 1H), 7.64 (t,  $J = 7.5$  Hz, 1H), 7.44 (q,  $J = 7.6$  Hz, 2H), 7.33 (d,  $J = 8.0$  Hz, 2H), 5.30 (q,  $J = 6.6$  Hz, 1H), 2.41 (s, 3H), 1.78 (d,  $J = 6.5$  Hz, 3H).

= 6.5 Hz, 3H).

$^{13}\text{C NMR}$  (101 MHz,  $\text{CDCl}_3$ )  $\delta$  166.5, 147.5, 145.1, 136.4, 134.2, 129.7, 129.0, 128.9, 128.4, 125.1, 122.6, 58.8, 21.8, 21.6.

ESI-MS: calculated  $C_{16}H_{15}NO_3S$   $[M+H]^+$ , 302.0845; Found 302.0849.

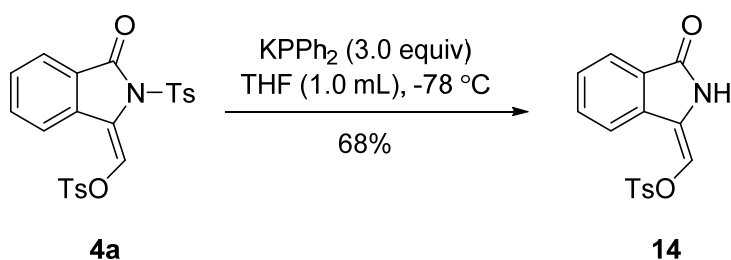

### (E)-(3-oxoisindolin-1-ylidene)methyl 4-methylbenzenesulfonate (**14**)

To a solution of (E)-(3-oxo-2-tosylisindolin-1-ylidene)methyl 4-methylbenzenesulfonate **4a** (15.0 mg, 0.032 mmol, 1.0 equiv) in THF (1.0 mL) was added potassium diphenylphosphide (0.50 M THF solution, 0.20 mL, 3.0 equiv) at  $-78^\circ\text{C}$ . The reaction mixture was stirred for 2 h at the same

temperature. Dilute hydrochloric acid (1.0 M, 0.75 mL) was then added to the reaction mixture and the temperature was raised to room temperature. The resulting mixture was stirred for 30 min. Saturated aqueous NaHCO<sub>3</sub> (10.0 mL) was added to the mixture and the mixture was extracted with EtOAc (10 mL × 3). The combined organic layer was washed with brine, dried over anhydrous Na<sub>2</sub>SO<sub>4</sub>, and concentrated under reduced pressure. Purification by silica gel chromatography (hexane/EtOAc = 3:1 v/v) gave 6.8 mg (68%, 0.22 mmol) the titled compound as a white solid.

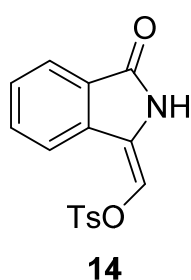

R<sub>F</sub> (Petroleum ether/ EtOAc 3:1): 0.23.

<sup>1</sup>H NMR (400 MHz, CDCl<sub>3</sub>) δ 8.32 – 8.14 (m, 1H), 7.71 (dd, *J* = 7.5, 4.0 Hz, 3H), 7.61 – 7.48 (m, 2H), 7.28 (d, *J* = 8.2 Hz, 2H), 7.04 (d, *J* = 1.1 Hz, 1H), 6.19 (s, 1H), 2.42 (s, 3H).

<sup>13</sup>C NMR (101 MHz, CDCl<sub>3</sub>) δ 160.8, 144.9, 144.7, 135.8, 135.6, 135.2, 130.3, 130.1, 129.4, 127.7, 122.4, 120.9, 116.2, 21.7.

ESI-MS: calculated C<sub>16</sub>H<sub>13</sub>NO<sub>4</sub>S [M+H]<sup>+</sup>, 316.0638; Found 316.0630.

## VI. Total synthesis of aristolactam BII

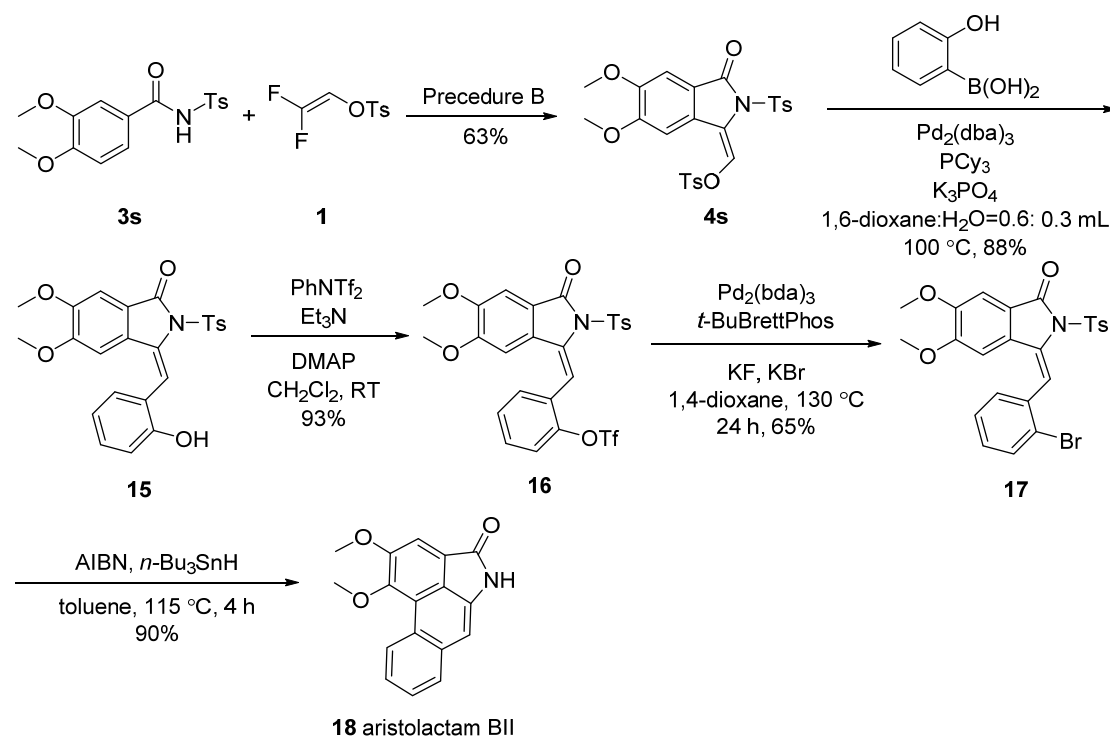

### (E)-(5,6-dimethoxy-3-oxo-2-tosylisoindolin-1-ylidene)methyl

#### 4-methylbenzenesulfonate (**4s**)

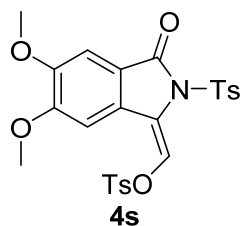

Following general procedure B, using AgSbF<sub>6</sub> as additive and HFIP (1.0 mL) as solvent, **4s** was obtained in 63% yield (66.6 mg, 0.126 mmol) as a white solid after column chromatography (eluent = dichloromethane).

R<sub>F</sub> (Petroleum ether/ dichloromethane 1:3): 0.13.

<sup>1</sup>H NMR (400 MHz, CDCl<sub>3</sub>) δ 7.94 – 7.83 (m, 5H), 7.46 (s, 1H), 7.39 (d, *J* = 8.1 Hz, 2H), 7.29 (d, *J* = 8.2 Hz, 2H), 7.13 (s, 1H), 3.93 (s, 3H), 3.87 (s, 3H), 2.46 (s, 3H), 2.40 (s, 3H).

<sup>13</sup>C NMR (101 MHz, CDCl<sub>3</sub>) δ 164.3, 155.0, 151.6, 146.5, 145.7, 135.3, 131.9, 130.5, 129.9, 129.0, 128.3, 128.1, 126.9, 126.1, 119.4, 106.5, 105.1, 56.5, 56.4, 21.9, 21.8.

ESI-MS: calculated C<sub>25</sub>H<sub>23</sub>NO<sub>8</sub>S<sub>2</sub> [M+H]<sup>+</sup>, 530.0938; Found 530.0926.

#### (E)-3-(2-hydroxybenzylidene)-2-tosylisoindolin-1-one (**15**)<sup>4</sup>

To a 10.0 mL of sealed tube charged a stirring bar, were added **4s** (52.9 mg, 0.1 mmol, 1.0 equiv), PCy<sub>3</sub> (2.8 mg, 0.01 mmol, 10 mol %), (4-methoxyphenyl) boronic acid (41.4 mg, 3.0 equiv), and Pd<sub>2</sub>dba<sub>3</sub> (4 mg, 0.005 mmol, 5 mol %). Then the tube was evacuated under reduced pressure and refilled with Ar for three times. After that, K<sub>3</sub>PO<sub>4</sub> (36 mg, 1.7 equiv) dissolved in a mixed solvent (dioxane:H<sub>2</sub>O=0.6 mL:0.3 mL) was added to the tube under Ar. The tube was sealed again and the reaction mixture was stirred at 100 °C for 12 h. The resulting mixture was cooled to room temperature and concentrated in *vacuo*. The residue was purified with flash column chromatography (Petroleum ether/ EtOAc 3:1 v/v) to give compound **15** as a white solid (40.5 mg, 88%).

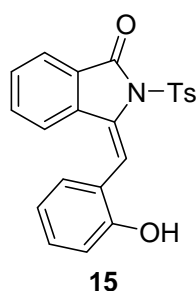

R<sub>F</sub> (Petroleum ether/ EtOAc 2:1):0.28.

<sup>1</sup>H NMR (400 MHz, CDCl<sub>3</sub>) δ 8.01 (d, *J* = 8.4 Hz, 2H), 7.69 (s, 1H), 7.39 – 7.30 (m, 3H), 7.32 – 7.27 (m, 1H), 7.26 – 7.21 (m, 1H),

7.11 (s, 1H), 7.05 – 7.02 (m, 1H), 6.99 (td,  $J = 7.4, 1.1$  Hz, 1H), 6.35 (s, 1H), 5.47 (s, 1H), 3.84 (s, 3H), 3.45 (s, 3H), 2.42 (s, 3H).

$^{13}\text{C}$  NMR (101 MHz,  $\text{CDCl}_3$ )  $\delta$  165.1, 154.3, 153.7, 151.5, 145.5, 136.1, 135.3, 130.6, 130.5, 130.4, 129.9, 128.1, 121.7, 121.0, 120.5, 116.3, 110.0, 105.7, 104.9, 56.4, 55.8, 21.8.

ESI-MS: calculated  $\text{C}_{24}\text{H}_{21}\text{NO}_6\text{S}$   $[\text{M}+\text{H}]^+$ , 452.1162; Found 452.1154.

**(E)-2-((5,6-dimethoxy-3-oxo-2-tosylisoindolin-1-ylidene)methyl)phenyl trifluoromethanesulfonate (16)**

To a 10.0 mL tube charged with a stirring bar, were added compound **15** (68.0 mg, 0.171 mmol, 1.0 equiv),  $\text{PhNTf}_2$  (90 mg, 0.240 mmol, 1.4 equiv),  $\text{Et}_3\text{N}$  (dry, 26.0 mg, 0.260 mmol, 1.5 equiv), DMAP (1.0 mg, 5 mol %) and  $\text{CH}_2\text{Cl}_2$  (dry, 2.0 mL). The tube was stirred at room temperature for 4 h. Then the mixture was concentrated in *vacuo* and the residue was purified with flash column chromatography (Petroleum ether/ EtOAc 3:1) to give compound **16** as a white solid (92.9 mg, 93%).

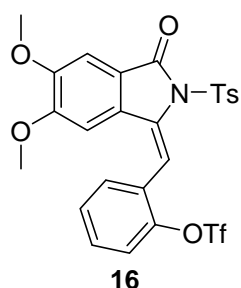

$\text{R}_f$  (Petroleum ether/ EtOAc 2:1):0.30.

$^1\text{H}$  NMR (400 MHz, Acetone- $d_6$ )  $\delta$  8.07 (d,  $J = 8.3$  Hz, 2H), 7.80 (s, 1H), 7.77 – 7.61 (m, 4H), 7.48 (d,  $J = 8.2$  Hz, 2H), 7.16 (s, 1H), 6.23 (s, 1H), 3.88 (s, 3H), 3.41 (s, 3H), 2.44 (s, 3H).

$^{13}\text{C}$  NMR (101 MHz, Acetone- $d_6$ )  $\delta$  165.0, 155.2, 153.0, 148.6, 146.5, 137.1, 136.5, 133.7, 131.8, 130.6, 130.5, 130.4, 130.3, 128.9, 123.3, 121.0, 108.7, 106.3, 105.6, 56.5, 55.8, 21.6.

ESI-MS: calculated  $\text{C}_{25}\text{H}_{20}\text{F}_3\text{NO}_8\text{S}_2$   $[\text{M}+\text{H}]^+$ , 584.0655; Found 584.0645.

**(E)-3-(2-bromobenzylidene)-5,6-dimethoxy-2-tosylisoindolin-1-one (17)<sup>5</sup>**

To a sealed tube (A) equipped with a magnetic stir bar was added compound **16** (58.3 mg, 0.1 mmol, 1.0 equiv), KF (5.8 mg, 0.15 mmol, 1.5 equiv) and KBr (47.6 mg, 0.4 mmol, 4.0 equiv). The tube was sealed with a Teflon-lined septum, evacuated and backfilled with Ar (this process was repeated a total three times).

To another sealed tube (B) equipped with a magnetic stir bar was added  $\text{Pd}_2(\text{dba})_3$  (14.0 mg, 0.015 mmol, 15 mol %) and *t*-BuBrettPhos (22.0 mg, 0.045

mmol, 45 mol %). The tube was sealed with a Teflon-lined septum, evacuated and backfilled with Ar (this process was repeated a total three times). 1,4-Dioxane (1.0 mL) was added via syringe, and the mixture was heated to at 120 °C in a preheated oil bath for 3 min. After the catalyst solution was cooled to room temperature, it was added to the reaction tube (A) via syringe, followed by addition of 1,4-dioxane (3.0 mL). The resulting mixture was stirred vigorously at 130 °C in a preheated oil bath for 24 h and then cooled to room temperature and concentrated under reduced pressure. The residue was purified with flash column chromatography (Petroleum ether/ EtOAc 3:1 v/v) to give the titled compound as a light yellow solid (26.2 mg, 65%).

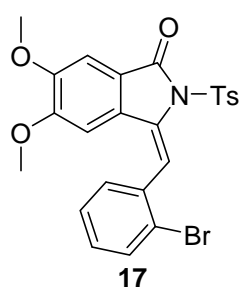

**17**

$R_f$  (Petroleum ether/ EtOAc 3:1): 0.35.

$^1\text{H NMR}$  (400 MHz,  $\text{CDCl}_3$ )  $\delta$  8.06 (d,  $J = 8.4$  Hz, 2H), 7.77 (s, 1H), 7.73 (dd,  $J = 8.0, 1.2$  Hz, 1H), 7.47 (dt,  $J = 7.6, 1.4$  Hz, 1H), 7.40 (td,  $J = 7.5, 1.2$  Hz, 1H), 7.33 (d,  $J = 8.1$  Hz, 2H), 7.31 – 7.26 (m, 1H), 7.15 (s, 1H), 6.14 (s, 1H), 3.86 (s, 3H),

3.42 (s, 3H), 2.41 (s, 3H).

$^{13}\text{C NMR}$  (101 MHz,  $\text{CDCl}_3$ )  $\delta$  165.0, 154.1, 151.4, 145.3, 136.5, 136.2, 133.9, 133.3, 131.5, 130.6, 129.9, 129.8, 128.2, 127.7, 124.5, 120.6, 115.4, 105.3, 105.0, 56.4, 55.8, 21.8.

ESI-MS: calculated  $\text{C}_{24}\text{H}_{20}\text{BrNO}_5\text{S}$   $[\text{M}+\text{H}]^+$ , 584.0655; Found 584.0645.

### 1,2-dimethoxydibenzo[cd,f]indol-4(5H)-one (**18**)<sup>6a,6b</sup>

To a dry 50.0 mL three-neck round-bottom flask was added compound **17** (25.0 mg, 0.049 mmol) and dry degassed toluene (30.0 mL). The flask was evacuated and filled with Ar for three times. The solution was heated at 115 °C for 20 minutes. To a 10.0 mL round bottom flask was added AIBN (12.0 mg, 1.5 equiv), *n*- $\text{Bu}_3\text{SnH}$  (113.0 mg, 8.0 equiv) and dry degassed toluene (10.0 mL). The mixture was dropped to the reaction flash containing compound **17** via syringe in 60 minutes. Once addition finished, refluxing was kept up for a further 4 h. The toluene was evaporated under reduced pressure and the residue was further purified with (Petroleum ether/ EtOAc 2:1 v/v) to give a light yellow solid

(12.2 mg, 90%). The spectrum of the product was consistent with the literature.<sup>7</sup>

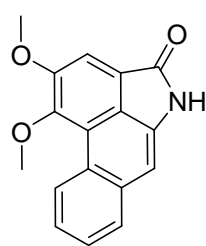

**18**

$R_f$  (Petroleum ether/ EtOAc 1:1): 0.68.

$^1\text{H NMR}$  (400 MHz,  $\text{DMSO-}d_6$ )  $\delta$  10.83 (s, 1H), 9.12 (dd,  $J = 7.8$ , 1.7 Hz, 1H), 7.95 (dd,  $J = 7.6$ , 1.9 Hz, 1H), 7.86 (s, 1H), 7.71 – 7.49 (m, 2H), 7.14 (s, 1H), 4.06 (s, 3H), 4.04 (s, 3H).

$^{13}\text{C NMR}$  (101 MHz,  $\text{DMSO-}d_6$ )  $\delta$  168.4, 154.2, 150.4, 135.1,

134.8, 129.0, 127.5, 126.8, 125.9, 125.5, 123.3, 121.6, 119.9, 109.9, 104.6, 59.9,

57.0.

ESI-MS: calculated  $\text{C}_{17}\text{H}_{13}\text{NO}_3$   $[\text{M}+\text{H}]^+$ , 280.0968; Found 280.0963.

## VII. Controlled experiments

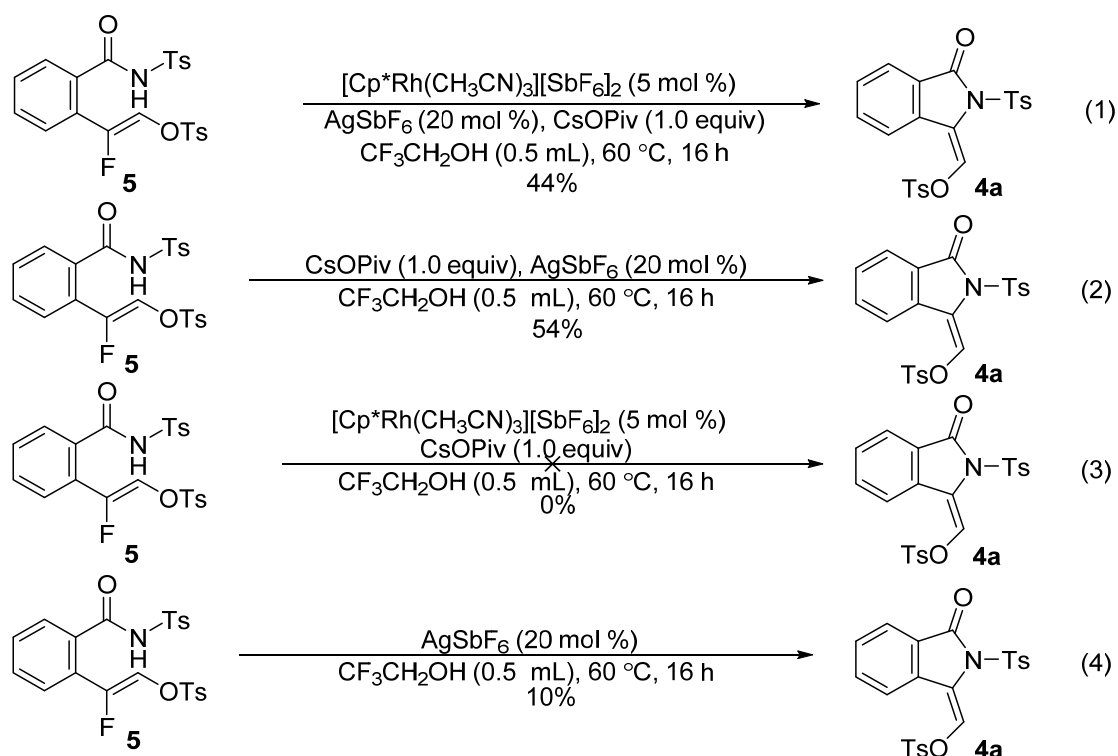

To a 10.0 mL tube with a stirring bar, were added compound **5** (36.4 mg, 0.08 mmol, 1.0 equiv),  $[\text{Cp}^*\text{Rh}(\text{CH}_3\text{CN})_3][\text{SbF}_6]_2$  (3.3 mg, 0.004 mmol, 5 mol %)  $\text{CsOPiv}$  (18.8 mg, 0.08 mmol, 1.0 equiv) and  $\text{AgSbF}_6$  (5.5 mg, 0.008 mmol, 20 mol %) in the glove-box. The tube was then moved out and TFE (0.5 mL) was added. The mixture was stirred at 60°C for 16 h. The yield was determined by  $^1\text{H NMR}$  using

4-iodoanisole as an internal standard.

- (1) Following the above procedure, **4a** was obtained in 44% yield
- (2) Following the above procedure, with no  $[\text{Cp}^*\text{Rh}(\text{CH}_3\text{CN})_3][\text{SbF}_6]_2$  added, **4a** was obtained in 54% yield.
- (3) Following the above procedure, with no  $\text{AgSbF}_6$  added, no desired product **4a** was obtained.
- (4) Following the above procedure, with no  $[\text{Cp}^*\text{Rh}(\text{CH}_3\text{CN})_3][\text{SbF}_6]_2$  and  $\text{CsOPiv}$  added, **4a** was obtained in 10% yield.

## VIII. X-ray crystal structure data

### i.X-ray structure for **4a**

Single crystals of  $\text{C}_{23}\text{H}_{19}\text{N}_1\text{O}_6\text{S}_2$  were colourless crystal. A suitable crystal was selected on a **Xcalibur, Onyx, Nova** diffractometer. The crystal was kept at 103(2) K during data collection. Using Olex2, the structure was solved with the XS structure solution program using Charge Flipping and refined with the XL refinement package using Gauss-Newton minimization.

**Crystal Data** for  $\text{C}_{23}\text{H}_{19}\text{NO}_6\text{S}_2$  ( $M = 469.54$  g/mol): triclinic, space group P-1 (no. 2),  $a = 7.83191(19)$  Å,  $b = 12.3569(3)$  Å,  $c = 22.7654(5)$  Å,  $\alpha = 104.4355(19)^\circ$ ,  $\beta = 97.8284(19)^\circ$ ,  $\gamma = 93.8331(19)^\circ$ ,  $V = 2102.05(9)$  Å<sup>3</sup>,  $Z = 4$ ,  $T = 100$  K,  $\mu(\text{Cu K}\alpha) = 2.668$  mm<sup>-1</sup>,  $D_{\text{calc}} = 1.4836$  g/cm<sup>3</sup>, 16920 reflections measured ( $4.06^\circ \leq 2\theta \leq 134.12^\circ$ ), 7494 unique ( $R_{\text{int}} = 0.0293$ ,  $R_{\text{sigma}} = 0.0339$ ) which were used in all calculations. The final  $R_1$  was 0.0361 ( $|I| \geq 2\sigma(I)$ ) and  $wR_2$  was 0.0979 (all data).

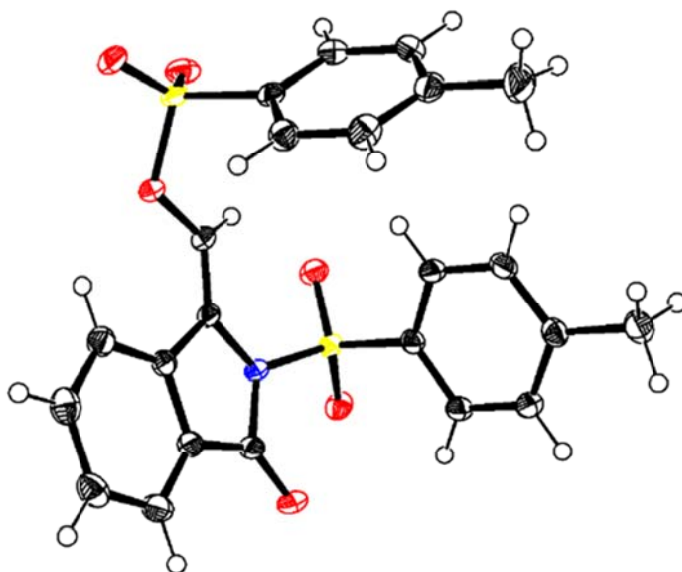

**Table 1 Crystal data and structure refinement for jww\_160908.**

|                                    |                                                                |
|------------------------------------|----------------------------------------------------------------|
| Identification code                | jww_160908                                                     |
| Empirical formula                  | C <sub>23</sub> H <sub>19</sub> NO <sub>6</sub> S <sub>2</sub> |
| Formula weight                     | 469.54                                                         |
| Temperature/K                      | 100                                                            |
| Crystal system                     | triclinic                                                      |
| Space group                        | P-1                                                            |
| a/Å                                | 7.83191(19)                                                    |
| b/Å                                | 12.3569(3)                                                     |
| c/Å                                | 22.7654(5)                                                     |
| α/°                                | 104.4355(19)                                                   |
| β/°                                | 97.8284(19)                                                    |
| γ/°                                | 93.8331(19)                                                    |
| Volume/Å <sup>3</sup>              | 2102.05(9)                                                     |
| Z                                  | 4                                                              |
| ρ <sub>calc</sub> /cm <sup>3</sup> | 1.4836                                                         |
| μ/mm <sup>-1</sup>                 | 2.668                                                          |
| F(000)                             | 981.7                                                          |



|                                             |                                                               |
|---------------------------------------------|---------------------------------------------------------------|
| Crystal size/mm <sup>3</sup>                | 0.3 × 0.2 × 0.1                                               |
| Radiation                                   | Cu Kα (λ = 1.54184)                                           |
| 2θ range for data collection/°              | 4.06 to 134.12                                                |
| Index ranges                                | -9 ≤ h ≤ 9, -15 ≤ k ≤ 12, -28 ≤ l ≤ 27                        |
| Reflections collected                       | 16920                                                         |
| Independent reflections                     | 7494 [R <sub>int</sub> = 0.0293, R <sub>sigma</sub> = 0.0339] |
| Data/restraints/parameters                  | 7494/0/581                                                    |
| Goodness-of-fit on F <sup>2</sup>           | 1.052                                                         |
| Final R indexes [I>=2σ (I)]                 | R <sub>1</sub> = 0.0361, wR <sub>2</sub> = 0.0954             |
| Final R indexes [all data]                  | R <sub>1</sub> = 0.0392, wR <sub>2</sub> = 0.0979             |
| Largest diff. peak/hole / e Å <sup>-3</sup> | 0.42/-0.52                                                    |

**Table 2 Fractional Atomic Coordinates (× 10<sup>4</sup>) and Equivalent Isotropic Displacement Parameters (Å<sup>2</sup> × 10<sup>3</sup>) for jww\_160908. U<sub>eq</sub> is defined as 1/3 of of the trace of the orthogonalised U<sub>ij</sub> tensor.**

| Atom | x          | y          | z           | U(eq)     |
|------|------------|------------|-------------|-----------|
| S1   | 1540.9(5)  | 2379.1(3)  | 4335.45(18) | 20.63(11) |
| S2   | 422.2(6)   | 4892.5(4)  | 8310.59(19) | 24.52(11) |
| S3   | 8825.6(6)  | 729.8(3)   | 7885.39(19) | 22.83(11) |
| S4   | 2825.4(6)  | 9386.9(4)  | 8785.95(19) | 23.25(11) |
| O5   | 473.3(17)  | 1336.8(11) | 4091.0(6)   | 26.3(3)   |
| O6   | 9699.0(17) | 8825.3(11) | 2312.2(7)   | 31.5(3)   |
| O0aa | 1318.2(17) | 9373.8(11) | 9070.7(6)   | 29.8(3)   |
| O8   | 986.8(17)  | 3263.6(11) | 4775.8(6)   | 26.9(3)   |
| O1aa | 9948.5(18) | 4162.5(12) | 1231.6(6)   | 29.7(3)   |
| O2aa | 18(2)      | 3660.5(11) | 6927.3(6)   | 34.1(3)   |
| O11  | 3157.5(18) | 4658.1(10) | 4301.0(6)   | 28.8(3)   |
| O12  | 6623.6(19) | 9687.1(11) | 1426.9(6)   | 31.6(3)   |
| O13  | 8627.3(18) | 1002.4(11) | 8516.1(6)   | 31.9(3)   |
| O14  | 779.1(18)  | 6087.4(12) | 1907.7(6)   | 32.5(3)   |
| N15  | 693(2)     | 5374.0(13) | 7694.5(7)   | 23.7(3)   |
| N16  | 1828.1(19) | 2882.8(12) | 3728.9(6)   | 19.9(3)   |
| C17  | 4197(2)    | 8398.9(15) | 9658.8(8)   | 25.2(4)   |
| O18  | 1204.5(17) | 620.7(10)  | 2280.6(5)   | 23.8(3)   |
| O19  | 2493.7(17) | 8359(1)    | 8163.5(5)   | 24.9(3)   |
| C20  | 7038(3)    | 1674.5(15) | 7070.5(9)   | 27.7(4)   |

|     |                    |            |         |
|-----|--------------------|------------|---------|
| C21 | 4542(2) 8987.4(15) | 9233.2(8)  | 22.9(4) |
| C22 | 2833(2) 2770.2(16) | 2178.5(8)  | 25.5(4) |
| C23 | 2724(2) 7188.9(15) | 6861.0(8)  | 22.4(4) |
| C24 | 1355(2) 5323.2(14) | 6732.8(8)  | 20.9(4) |
| C25 | 4186(2) 1066.0(15) | 4383.9(8)  | 24.2(4) |
| C26 | 2595(2) 2946.8(14) | 2789.8(8)  | 20.8(4) |
| C27 | 1792(2) 2210.6(14) | 3111.1(8)  | 19.0(3) |
| C28 | 5508(3) 1839.6(16) | 6729.0(9)  | 33.1(5) |
| C29 | 6940(2) 919.6(14)  | 7426.5(8)  | 22.0(4) |
| C30 | 3621(3) 5308.4(16) | 9010.6(8)  | 27.6(4) |
| C31 | 600(2) 4637.4(15)  | 7088.7(8)  | 23.4(4) |
| C32 | 4786(3) 4993.4(16) | 774.1(9)   | 29.6(4) |
| C33 | 1099(2) 1144.8(15) | 2891.4(8)  | 21.2(4) |
| C34 | 3622(2) 2113.2(14) | 4619.7(8)  | 20.7(4) |
| C35 | 1946(2) 6398.6(14) | 7107.5(8)  | 20.0(3) |
| C36 | 3151(2) 3989.4(15) | 3205.5(8)  | 22.1(4) |
| C37 | 1526(2) 6463.3(14) | 7720.5(8)  | 19.8(3) |
| C38 | 2895(2) 6873.9(16) | 6243.2(8)  | 25.1(4) |
| C39 | 2762(2) 3959.3(14) | 3812.5(8)  | 21.8(4) |
| C40 | 3132(2) 8347.5(15) | 4901.2(8)  | 24.3(4) |
| C41 | 1710(2) 7351.5(15) | 8207.9(8)  | 23.3(4) |
| C42 | 4433(3) 1979.8(16) | 20.6(9)    | 29.9(4) |
| C43 | 2296(2) 5795.0(16) | 5871.1(8)  | 25.5(4) |
| C44 | 5387(2) 335.8(16)  | 7446.2(9)  | 27.4(4) |
| C45 | 4200(3) 9150.9(15) | 5373.3(8)  | 26.0(4) |
| C46 | 3888(3) 516.8(18)  | 7104.0(9)  | 31.8(4) |
| C47 | 1518(2) 5005.5(15) | 6113.4(8)  | 24.3(4) |
| C48 | 4184(3) 4693.4(17) | 2424.8(10) | 32.0(4) |
| C49 | 3775(3) 766.4(17)  | 857.8(8)   | 29.7(4) |
| C50 | 2899(3) 3434.7(16) | 8335.7(9)  | 30.1(4) |
| C51 | 4333(3) 6077.4(17) | 988.7(9)   | 28.8(4) |
| C52 | 3625(3) 3650.4(17) | 2006.1(9)  | 30.7(4) |
| C53 | 4675(2) 2942.4(15) | 5076.0(8)  | 24.1(4) |
| C54 | 3946(2) 4869.2(16) | 3033.7(9)  | 28.0(4) |
| C1  | 2744(3) 1787.1(17) | 122.9(9)   | 33.2(5) |
| C2  | 2471(2) 4521.1(15) | 8566.0(8)  | 23.8(4) |
| C3  | 3704(2) 7295.8(15) | 4692.1(8)  | 25.7(4) |
| C4  | 2434(3) 1158.4(19) | 533.0(9)   | 36.1(5) |
| C5  | 3927(3) 1273.0(16) | 6741.5(9)  | 31.2(4) |
| C6  | 7730(3) 8535(2)    | 3622.7(11) | 44.0(6) |

|     |                    |            |         |
|-----|--------------------|------------|---------|
| C7  | 1412(3) 8607.9(17) | 4616.1(9)  | 31.2(4) |
| C8  | 2618(3) 6393(2)    | 728.3(10)  | 38.7(5) |
| C9  | 4498(3) 3150.8(16) | 8560.9(9)  | 32.5(4) |
| C10 | 1276(3) 2242(2)    | -210.8(11) | 49.0(6) |

**Table 3 Anisotropic Displacement Parameters ( $\text{\AA}^2 \times 10^3$ ) for jww\_160908. The Anisotropic displacement factor exponent takes the form:  $-2 \pi^2 [h^2 a^{*2} U_{11} + 2hka^* b^* U_{12} + \dots]$ .**

| Atom | $U_{11}$ | $U_{22}$ | $U_{33}$ | $U_{12}$  | $U_{13}$  | $U_{23}$  |
|------|----------|----------|----------|-----------|-----------|-----------|
| S1   | 24.0(2)  | 19.4(2)  | 16.6(2)  | 1.88(16)  | 2.74(16)  | 1.79(16)  |
| S2   | 28.0(2)  | 24.4(2)  | 20.3(2)  | -0.68(17) | 4.45(17)  | 4.75(17)  |
| S3   | 24.6(2)  | 16.4(2)  | 21.8(2)  | 2.32(16)  | -2.47(16) | -2.24(16) |
| S4   | 28.8(2)  | 19.5(2)  | 18.7(2)  | 3.21(17)  | 2.26(17)  | 0.57(16)  |
| O5   | 29.8(7)  | 24.3(7)  | 22.9(6)  | -3.2(5)   | 3.7(5)    | 4.4(5)    |
| O6   | 24.0(7)  | 20.9(6)  | 42.9(8)  | -0.9(5)   | 0.2(6)    | -0.2(6)   |
| O0aa | 29.0(7)  | 30.9(7)  | 26.4(7)  | 6.5(6)    | 4.5(5)    | 0.8(5)    |
| O8   | 28.9(7)  | 29.7(7)  | 19.6(6)  | 8.2(5)    | 5.2(5)    | -0.2(5)   |
| O1aa | 34.7(7)  | 32.0(7)  | 23.1(6)  | 6.8(6)    | 8.9(5)    | 5.4(5)    |
| O2aa | 48.8(9)  | 20.3(7)  | 30.6(7)  | -3.6(6)   | 10.5(6)   | 1.2(5)    |
| O11  | 37.9(8)  | 18.2(6)  | 24.0(7)  | -0.6(5)   | 0.2(5)    | -2.7(5)   |
| O12  | 47.3(8)  | 20.6(6)  | 24.8(7)  | 2.9(6)    | 3.1(6)    | 3.5(5)    |
| O13  | 41.2(8)  | 27.9(7)  | 19.8(6)  | 9.1(6)    | -3.1(5)   | -3.6(5)   |
| O14  | 33.6(7)  | 33.9(8)  | 28.4(7)  | -7.3(6)   | 3.8(6)    | 8.4(6)    |
| N15  | 28.4(8)  | 21.7(8)  | 18.3(7)  | -0.1(6)   | 2.5(6)    | 1.6(6)    |
| N16  | 25.9(8)  | 15.9(7)  | 15.4(7)  | 2.5(6)    | 1.7(6)    | 0.4(5)    |
| C17  | 28.0(9)  | 22.1(9)  | 21.5(9)  | -1.3(7)   | 1.7(7)    | 0.6(7)    |
| O18  | 33.0(7)  | 17.1(6)  | 17.7(6)  | 3.7(5)    | 0.0(5)    | -0.3(5)   |
| O19  | 32.4(7)  | 21.0(6)  | 18.0(6)  | -0.2(5)   | 2.1(5)    | 0.7(5)    |
| C20  | 32.2(10) | 19.5(9)  | 28.7(10) | 0.1(7)    | 1.9(8)    | 3.6(7)    |
| C21  | 26.0(9)  | 19.4(8)  | 18.6(8)  | 1.1(7)    | 1.3(7)    | -2.2(6)   |
| C22  | 27.3(9)  | 26.9(9)  | 22.1(9)  | 5.2(7)    | 3.0(7)    | 5.7(7)    |
| C23  | 23.3(9)  | 19.3(8)  | 22.7(9)  | 2.6(7)    | 1.6(7)    | 2.9(7)    |
| C24  | 22.3(8)  | 18.7(8)  | 19.9(8)  | 3.4(7)    | 1.2(7)    | 2.7(7)    |
| C25  | 33.4(10) | 17.7(8)  | 19.4(8)  | 1.7(7)    | 2.2(7)    | 2.4(7)    |
| C26  | 19.6(8)  | 19.9(8)  | 22.2(9)  | 5.6(7)    | -0.0(7)   | 4.7(7)    |
| C27  | 20.3(8)  | 17.8(8)  | 16.4(8)  | 4.5(6)    | 0.1(6)    | 0.9(6)    |
| C28  | 49.2(12) | 20.8(9)  | 28(1)    | 7.5(8)    | -0.6(9)   | 6.7(8)    |
| C29  | 25.0(9)  | 18.6(8)  | 18.8(8)  | 4.4(7)    | 1.5(7)    | -1.3(7)   |
| C30  | 36.8(10) | 20.8(9)  | 22.9(9)  | 3.4(8)    | 2.7(8)    | 2.6(7)    |

|     |          |          |          |          |           |          |
|-----|----------|----------|----------|----------|-----------|----------|
| C31 | 27.6(9)  | 19.6(9)  | 20.1(8)  | 2.4(7)   | 2.2(7)    | 0.5(7)   |
| C32 | 35.7(11) | 26.6(10) | 23.5(9)  | 0.4(8)   | 1.1(8)    | 3.8(8)   |
| C33 | 25.6(9)  | 19.4(8)  | 16.5(8)  | 3.2(7)   | 1.4(7)    | 1.8(7)   |
| C34 | 25.9(9)  | 19.3(8)  | 17.9(8)  | 2.8(7)   | 3.9(7)    | 6.6(7)   |
| C35 | 19.1(8)  | 20.1(8)  | 18.5(8)  | 5.1(7)   | -0.6(6)   | 1.6(7)   |
| C36 | 21.3(8)  | 19.4(8)  | 24.4(9)  | 4.0(7)   | 0.5(7)    | 4.9(7)   |
| C37 | 20.1(8)  | 19.4(8)  | 19.1(8)  | 3.1(7)   | 1.1(6)    | 4.5(7)   |
| C38 | 25.6(9)  | 26.8(9)  | 24.5(9)  | 4.0(7)   | 5.3(7)    | 9.0(7)   |
| C39 | 22.6(9)  | 16.4(8)  | 23.9(9)  | 4.2(7)   | -0.5(7)   | 2.5(7)   |
| C40 | 28.4(9)  | 24.7(9)  | 22.4(9)  | 4.9(7)   | 4.4(7)    | 10.1(7)  |
| C41 | 27.1(9)  | 21.8(9)  | 19.6(8)  | 1.4(7)   | 1.4(7)    | 4.5(7)   |
| C42 | 40.6(11) | 22.3(9)  | 21.7(9)  | 2.3(8)   | -2.0(8)   | 0.5(7)   |
| C43 | 28.4(9)  | 30.1(10) | 18.0(8)  | 7.2(8)   | 5.3(7)    | 4.3(7)   |
| C44 | 29.2(10) | 28.9(10) | 25.0(9)  | 2.0(8)   | 5.0(7)    | 8.4(8)   |
| C45 | 35.8(10) | 19.7(9)  | 24.0(9)  | 7.6(8)   | 5.7(8)    | 6.4(7)   |
| C46 | 25.2(10) | 36.0(11) | 32.5(10) | 3.1(8)   | 4.3(8)    | 5.7(8)   |
| C47 | 28.4(9)  | 21.9(9)  | 19.1(8)  | 5.3(7)   | 1.9(7)    | -0.7(7)  |
| C48 | 29(1)    | 31.4(10) | 40.7(11) | 1.5(8)   | 6.7(8)    | 19.0(9)  |
| C49 | 30.8(10) | 33.6(10) | 20.6(9)  | -0.9(8)  | 5.5(7)    | -0.2(8)  |
| C50 | 41.9(11) | 20.5(9)  | 25.1(9)  | -1.0(8)  | 4.1(8)    | 2.5(7)   |
| C51 | 38.2(11) | 29.8(10) | 22.7(9)  | 8.6(8)   | 9.5(8)    | 10.8(8)  |
| C52 | 31.2(10) | 37.4(11) | 27.2(10) | 6.8(8)   | 7.5(8)    | 12.9(8)  |
| C53 | 30.6(10) | 18.4(8)  | 21.9(9)  | 3.7(7)   | 2.8(7)    | 3.1(7)   |
| C54 | 27.1(9)  | 21.5(9)  | 34.8(10) | 1.5(7)   | 2.0(8)    | 8.1(8)   |
| C1  | 35.6(11) | 31(1)    | 22.8(9)  | 9.5(8)   | -5.4(8)   | -8.0(8)  |
| C2  | 31.7(10) | 20.1(9)  | 20.1(8)  | -0.4(7)  | 5.2(7)    | 6.1(7)   |
| C3  | 30.3(10) | 21.6(9)  | 22.8(9)  | -0.9(7)  | 0.1(7)    | 4.4(7)   |
| C4  | 25.7(10) | 47.6(13) | 26.4(10) | 3.2(9)   | 3.2(8)    | -5.5(9)  |
| C5  | 33.7(11) | 28(1)    | 26.2(9)  | 13.5(8)  | -0.9(8)   | -3.1(8)  |
| C6  | 41.7(13) | 46.2(13) | 38.4(12) | 20.9(10) | -5.1(10)  | 2(1)     |
| C7  | 31.2(10) | 31.1(10) | 33.4(10) | 6.6(8)   | 2.9(8)    | 12.8(8)  |
| C8  | 43.0(12) | 43.8(12) | 35.3(11) | 15.4(10) | 10.9(9)   | 15.8(10) |
| C9  | 48.3(12) | 22.2(9)  | 28.5(10) | 8.5(9)   | 10.5(9)   | 5.8(8)   |
| C10 | 43.7(13) | 52.3(14) | 38.4(12) | 18.4(11) | -12.4(10) | -4.7(11) |

**Table 4 Bond Lengths for jww\_160908.**

| Atom | Atom | Length/Å   | Atom | Atom | Length/Å |
|------|------|------------|------|------|----------|
| S1   | O5   | 1.4280(13) | C24  | C47  | 1.392(2) |
| S1   | O8   | 1.4225(13) | C25  | C34  | 1.397(2) |

|      |                   |            |     |                  |          |
|------|-------------------|------------|-----|------------------|----------|
| S1   | N16               | 1.6851(15) | C25 | C45 <sup>1</sup> | 1.380(3) |
| S1   | C34               | 1.7530(18) | C26 | C27              | 1.462(3) |
| S2   | O1aa <sup>1</sup> | 1.4336(14) | C26 | C36              | 1.396(2) |
| S2   | O14 <sup>2</sup>  | 1.4209(14) | C27 | C33              | 1.335(2) |
| S2   | N15               | 1.6870(16) | C28 | C5               | 1.388(3) |
| S2   | C2                | 1.7607(19) | C29 | C44              | 1.384(3) |
| S3   | O6 <sup>3</sup>   | 1.4213(15) | C30 | C32 <sup>1</sup> | 1.387(3) |
| S3   | O13               | 1.4233(14) | C30 | C2               | 1.388(3) |
| S3   | O18 <sup>4</sup>  | 1.6143(12) | C32 | C51              | 1.394(3) |
| S3   | C29               | 1.7536(18) | C34 | C53              | 1.390(2) |
| S4   | O0aa              | 1.4231(14) | C35 | C37              | 1.461(2) |
| S4   | O12 <sup>5</sup>  | 1.4134(14) | C36 | C39              | 1.464(3) |
| S4   | O19               | 1.6268(12) | C36 | C54              | 1.382(3) |
| S4   | C21               | 1.7475(18) | C37 | C41              | 1.336(2) |
| O2aa | C31               | 1.208(2)   | C38 | C43              | 1.400(3) |
| O11  | C39               | 1.212(2)   | C40 | C45              | 1.397(3) |
| N15  | C31               | 1.440(2)   | C40 | C3               | 1.394(3) |
| N15  | C37               | 1.440(2)   | C40 | C7               | 1.504(3) |
| N16  | C27               | 1.440(2)   | C42 | C1               | 1.389(3) |
| N16  | C39               | 1.431(2)   | C43 | C47              | 1.381(3) |
| C17  | C21               | 1.392(3)   | C44 | C46              | 1.381(3) |
| C17  | C42 <sup>1</sup>  | 1.388(3)   | C46 | C5               | 1.394(3) |
| O18  | C33               | 1.396(2)   | C48 | C52              | 1.400(3) |
| O19  | C41               | 1.384(2)   | C48 | C54              | 1.389(3) |
| C20  | C28               | 1.393(3)   | C49 | C4               | 1.385(3) |
| C20  | C29               | 1.385(3)   | C50 | C2               | 1.395(3) |
| C21  | C49 <sup>1</sup>  | 1.388(3)   | C50 | C9               | 1.389(3) |
| C22  | C26               | 1.394(3)   | C51 | C8               | 1.508(3) |
| C22  | C52               | 1.382(3)   | C51 | C9 <sup>1</sup>  | 1.393(3) |
| C23  | C35               | 1.388(3)   | C53 | C3 <sup>1</sup>  | 1.387(3) |
| C23  | C38               | 1.390(3)   | C1  | C4               | 1.390(3) |
| C24  | C31               | 1.460(3)   | C1  | C10              | 1.509(3) |
| C24  | C35               | 1.397(2)   | C5  | C6 <sup>1</sup>  | 1.508(3) |

<sup>1</sup>1-X,1-Y,1-Z; <sup>2</sup>-X,1-Y,1-Z; <sup>3</sup>2-X,1-Y,1-Z; <sup>4</sup>1-X,-Y,1-Z; <sup>5</sup>1-X,2-Y,1-Z

**Table 5 Bond Angles for jww\_160908.**

| Atom | Atom | Atom | Angle/°   | Atom | Atom | Atom             | Angle/°    |
|------|------|------|-----------|------|------|------------------|------------|
| O8   | S1   | O5   | 120.28(8) | C2   | C30  | C32 <sup>2</sup> | 119.30(17) |

|                  |     |                   |            |                 |     |                  |            |
|------------------|-----|-------------------|------------|-----------------|-----|------------------|------------|
| N16              | S1  | O5                | 106.03(7)  | N15             | C31 | O2aa             | 125.79(17) |
| N16              | S1  | O8                | 106.76(8)  | C24             | C31 | O2aa             | 128.94(16) |
| C34              | S1  | O5                | 109.08(8)  | C24             | C31 | N15              | 105.27(14) |
| C34              | S1  | O8                | 109.31(8)  | C51             | C32 | C30 <sup>2</sup> | 121.18(18) |
| C34              | S1  | N16               | 104.13(8)  | C27             | C33 | O18              | 117.24(16) |
| O14 <sup>1</sup> | S2  | O1aa <sup>2</sup> | 120.56(8)  | C25             | C34 | S1               | 119.15(13) |
| N15              | S2  | O1aa <sup>2</sup> | 105.98(8)  | C53             | C34 | S1               | 119.59(13) |
| N15              | S2  | O14 <sup>1</sup>  | 106.57(8)  | C53             | C34 | C25              | 121.26(16) |
| C2               | S2  | O1aa <sup>2</sup> | 108.11(8)  | C24             | C35 | C23              | 119.64(16) |
| C2               | S2  | O14 <sup>1</sup>  | 109.62(9)  | C37             | C35 | C23              | 131.99(16) |
| C2               | S2  | N15               | 104.87(8)  | C37             | C35 | C24              | 108.33(16) |
| O13              | S3  | O6 <sup>3</sup>   | 121.44(8)  | C39             | C36 | C26              | 109.33(16) |
| O18 <sup>4</sup> | S3  | O6 <sup>3</sup>   | 108.35(7)  | C54             | C36 | C26              | 122.21(17) |
| O18 <sup>4</sup> | S3  | O13               | 102.37(7)  | C54             | C36 | C39              | 128.46(16) |
| C29              | S3  | O6 <sup>3</sup>   | 109.40(9)  | C35             | C37 | N15              | 106.26(14) |
| C29              | S3  | O13               | 110.78(8)  | C41             | C37 | N15              | 124.43(16) |
| C29              | S3  | O18 <sup>4</sup>  | 102.61(7)  | C41             | C37 | C35              | 129.08(17) |
| O12 <sup>5</sup> | S4  | O0aa              | 121.61(8)  | C43             | C38 | C23              | 121.72(18) |
| O19              | S4  | O0aa              | 107.53(7)  | N16             | C39 | O11              | 124.75(17) |
| O19              | S4  | O12 <sup>5</sup>  | 102.70(7)  | C36             | C39 | O11              | 129.53(17) |
| C21              | S4  | O0aa              | 109.43(9)  | C36             | C39 | N16              | 105.69(14) |
| C21              | S4  | O12 <sup>5</sup>  | 111.07(9)  | C3              | C40 | C45              | 118.49(17) |
| C21              | S4  | O19               | 102.51(7)  | C7              | C40 | C45              | 121.17(16) |
| C31              | N15 | S2                | 122.50(13) | C7              | C40 | C3               | 120.33(17) |
| C37              | N15 | S2                | 125.07(12) | C37             | C41 | O19              | 118.36(16) |
| C37              | N15 | C31               | 109.99(14) | C1              | C42 | C17 <sup>2</sup> | 121.04(19) |
| C27              | N16 | S1                | 125.32(12) | C47             | C43 | C38              | 120.33(17) |
| C39              | N16 | S1                | 120.93(11) | C46             | C44 | C29              | 119.06(18) |
| C39              | N16 | C27               | 109.98(14) | C40             | C45 | C25 <sup>2</sup> | 121.37(16) |
| C42 <sup>2</sup> | C17 | C21               | 118.82(18) | C5              | C46 | C44              | 120.86(19) |
| C33              | O18 | S3 <sup>4</sup>   | 115.57(11) | C43             | C47 | C24              | 117.75(16) |
| C41              | O19 | S4                | 116.41(11) | C54             | C48 | C52              | 120.07(18) |
| C29              | C20 | C28               | 117.82(18) | C4              | C49 | C21 <sup>2</sup> | 118.61(19) |
| C17              | C21 | S4                | 119.63(14) | C9              | C50 | C2               | 118.83(18) |
| C49 <sup>2</sup> | C21 | S4                | 119.10(15) | C8              | C51 | C32              | 119.94(18) |
| C49 <sup>2</sup> | C21 | C17               | 121.23(17) | C9 <sup>2</sup> | C51 | C32              | 118.43(19) |
| C52              | C22 | C26               | 117.97(17) | C9 <sup>2</sup> | C51 | C8               | 121.63(18) |
| C38              | C23 | C35               | 118.23(16) | C48             | C52 | C22              | 121.96(18) |
| C35              | C24 | C31               | 110.09(15) | C3 <sup>2</sup> | C53 | C34              | 118.71(16) |
| C47              | C24 | C31               | 127.59(16) | C48             | C54 | C36              | 117.93(17) |

|                  |     |     |            |                  |    |     |            |
|------------------|-----|-----|------------|------------------|----|-----|------------|
| C47              | C24 | C35 | 122.33(17) | C4               | C1 | C42 | 118.72(18) |
| C45 <sup>2</sup> | C25 | C34 | 118.75(16) | C10              | C1 | C42 | 120.5(2)   |
| C27              | C26 | C22 | 131.40(16) | C10              | C1 | C4  | 120.8(2)   |
| C36              | C26 | C22 | 119.86(17) | C30              | C2 | S2  | 119.23(14) |
| C36              | C26 | C27 | 108.74(15) | C50              | C2 | S2  | 119.94(15) |
| C26              | C27 | N16 | 105.91(14) | C50              | C2 | C30 | 120.80(18) |
| C33              | C27 | N16 | 125.25(16) | C53 <sup>2</sup> | C3 | C40 | 121.34(17) |
| C33              | C27 | C26 | 128.80(16) | C1               | C4 | C49 | 121.46(19) |
| C5               | C28 | C20 | 121.69(19) | C46              | C5 | C28 | 118.62(18) |
| C20              | C29 | S3  | 119.11(14) | C6 <sup>2</sup>  | C5 | C28 | 121.5(2)   |
| C44              | C29 | S3  | 118.91(14) | C6 <sup>2</sup>  | C5 | C46 | 119.9(2)   |
| C44              | C29 | C20 | 121.95(17) | C51 <sup>2</sup> | C9 | C50 | 121.44(18) |

<sup>1</sup>-X,1-Y,1-Z; <sup>2</sup>1-X,1-Y,1-Z; <sup>3</sup>2-X,1-Y,1-Z; <sup>4</sup>1-X,-Y,1-Z; <sup>5</sup>1-X,2-Y,1-Z

**Table 6 Hydrogen Atom Coordinates ( $\text{\AA} \times 10^4$ ) and Isotropic Displacement Parameters ( $\text{\AA}^2 \times 10^3$ ) for jww\_160908.**

| Atom | x       | y          | z          | U(eq)   |
|------|---------|------------|------------|---------|
| H47  | 1107(2) | 4270.5(15) | 5865.7(8)  | 29.1(5) |
| H43  | 2426(2) | 5604.9(16) | 5449.9(8)  | 30.6(5) |
| H38  | 3432(2) | 7404.6(16) | 6069.1(8)  | 30.1(5) |
| H23  | 3129(2) | 7925.4(15) | 7107.9(8)  | 26.9(4) |
| H54  | 4319(2) | 5572.3(16) | 3323.2(9)  | 33.6(5) |
| H48  | 4726(3) | 5281.7(17) | 2292.4(10) | 38.4(5) |
| H52  | 3796(3) | 3544.3(17) | 1591.1(9)  | 36.9(5) |
| H22  | 2463(2) | 2066.6(16) | 1889.3(8)  | 30.6(5) |
| H44  | 5352(2) | -182.1(16) | 7691.7(9)  | 32.9(5) |
| H46  | 2816(3) | 120.7(18)  | 7115.8(9)  | 38.2(5) |
| H28  | 5548(3) | 2353.1(16) | 6481.2(9)  | 39.7(5) |
| H20  | 8114(3) | 2066.9(15) | 7059.6(9)  | 33.2(5) |
| H17  | 3044(2) | 8258.9(15) | 9728.8(8)  | 30.3(5) |
| H25  | 3471(2) | 513.8(15)  | 4062.5(8)  | 29.0(5) |
| H30  | 3321(3) | 6046.3(16) | 9165.8(8)  | 33.1(5) |
| H32  | 3989(3) | 4451.8(16) | 474.9(9)   | 35.5(5) |
| H33  | 556(2)  | 758.8(15)  | 3140.3(8)  | 25.4(4) |
| H41  | 1312(2) | 7292.9(15) | 8575.8(8)  | 27.9(4) |
| H42  | 4653(3) | 2377.1(16) | -273.3(9)  | 35.8(5) |
| H45  | 3807(3) | 9861.2(15) | 5530.3(8)  | 31.2(5) |
| H49  | 3546(3) | 337.9(17)  | 1137.1(8)  | 35.7(5) |

|      |          |            |            |          |
|------|----------|------------|------------|----------|
| H50  | 2110(3)  | 2898.7(16) | 8030.2(9)  | 36.1(5)  |
| H53  | 4292(2)  | 3658.4(15) | 5226.0(8)  | 28.9(4)  |
| H3   | 2968(2)  | 6731.0(15) | 4384.4(8)  | 30.8(5)  |
| H4   | 1277(3)  | 994.0(19)  | 591.9(9)   | 43.3(6)  |
| H6a  | 8424(11) | 9257(3)    | 3817(7)    | 66.1(9)  |
| H6b  | 7454(3)  | 8173(14)   | 3941(6)    | 66.1(9)  |
| H6c  | 8388(12) | 8049(13)   | 3347.7(18) | 66.1(9)  |
| H7a  | 845(9)   | 9061(11)   | 4936.5(13) | 46.8(6)  |
| H7b  | 1594(3)  | 9028(11)   | 4313(5)    | 46.8(6)  |
| H7c  | 677(8)   | 7905.0(18) | 4413(6)    | 46.8(6)  |
| H8a  | 2661(8)  | 6463(14)   | 311(3)     | 58.1(7)  |
| H8b  | 1694(4)  | 5809(7)    | 717(7)     | 58.1(7)  |
| H8c  | 2385(11) | 7111(7)    | 988(5)     | 58.1(7)  |
| H9   | 4801(3)  | 2413.9(16) | 8404.4(9)  | 39.0(5)  |
| H10a | 843(18)  | 2846(12)   | 81(2)      | 73.4(10) |
| H10b | 1693(7)  | 2537(15)   | -533(6)    | 73.4(10) |
| H10c | 338(11)  | 1638(5)    | -397(8)    | 73.4(10) |

## ii.X-ray structure for 7a

Single crystals of  $C_{16}H_{12}O_5S_1$  were colourless crystal. A suitable crystal was selected on a **Xcalibur, Onyx, Nova** diffractometer. The crystal was kept at 103(2) K during data collection. Using Olex2, the structure was solved with the XS structure solution program using Charge Flipping and refined with the XL refinement package using Gauss-Newton minimization.

**Crystal Data** for  $C_{16}H_{12}O_5S$  (M = 316.34 g/mol): monoclinic, space group P21/c (no. 14),  $a = 8.99567(15)$  Å,  $b = 20.3803(3)$  Å,  $c = 8.08882(13)$  Å,  $\beta = 102.5457(16)^\circ$ ,  $V = 1447.55(4)$  Å<sup>3</sup>,  $Z = 4$ ,  $T = 100$  K,  $\mu(\text{Cu K}\alpha) = 2.193$  mm<sup>-1</sup>,  $D_{\text{calc}} = 1.4514$  g/cm<sup>3</sup>, 6373 reflections measured ( $8.68^\circ \leq 2\theta \leq 134^\circ$ ), 2570 unique ( $R_{\text{int}} = 0.0229$ ,  $R_{\text{sigma}} = 0.0233$ ) which were used in all calculations. The final  $R_1$  was 0.0373 ( $I \geq 2u(I)$ ) and  $wR_2$  was 0.1046 (all data).



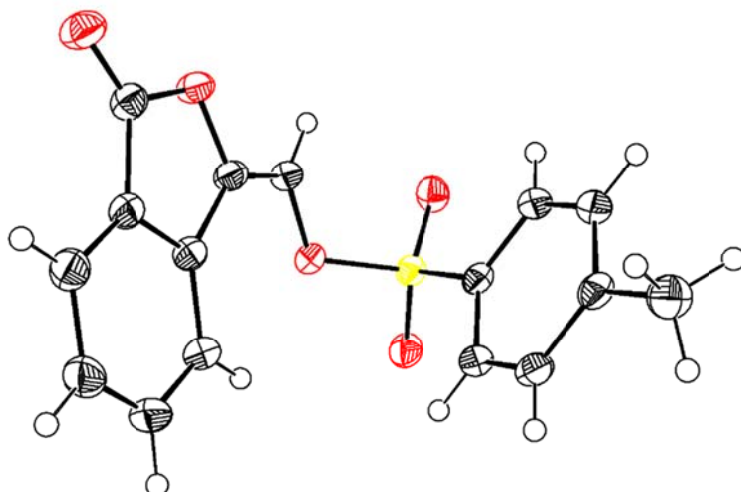

**Table 1 Crystal data and structure refinement for jww\_160815.**

|                                    |                                                  |
|------------------------------------|--------------------------------------------------|
| Identification code                | jww_160815                                       |
| Empirical formula                  | C <sub>16</sub> H <sub>12</sub> O <sub>5</sub> S |
| Formula weight                     | 316.34                                           |
| Temperature/K                      | 100                                              |
| Crystal system                     | monoclinic                                       |
| Space group                        | P2 <sub>1</sub> /c                               |
| a/Å                                | 8.99567(15)                                      |
| b/Å                                | 20.3803(3)                                       |
| c/Å                                | 8.08882(13)                                      |
| α/°                                | 90                                               |
| β/°                                | 102.5457(16)                                     |
| γ/°                                | 90                                               |
| Volume/Å <sup>3</sup>              | 1447.55(4)                                       |
| Z                                  | 4                                                |
| ρ <sub>calc</sub> /cm <sup>3</sup> | 1.4514                                           |
| μ/mm <sup>-1</sup>                 | 2.193                                            |
| F(000)                             | 659.6                                            |
| Crystal size/mm <sup>3</sup>       | 0.3 × 0.2 × 0.1                                  |
| Radiation                          | Cu Kα (λ = 1.54184)                              |

|                                                  |                                                                      |
|--------------------------------------------------|----------------------------------------------------------------------|
| 2 $\theta$ range for data collection/ $^{\circ}$ | 8.68 to 134                                                          |
| Index ranges                                     | -10 $\leq$ h $\leq$ 10, -24 $\leq$ k $\leq$ 24, -7 $\leq$ l $\leq$ 9 |
| Reflections collected                            | 6373                                                                 |
| Independent reflections                          | 2570 [ $R_{\text{int}} = 0.0229$ , $R_{\text{sigma}} = 0.0233$ ]     |
| Data/restraints/parameters                       | 2570/0/200                                                           |
| Goodness-of-fit on $F^2$                         | 1.060                                                                |
| Final R indexes [ $I \geq 2\sigma(I)$ ]          | $R_1 = 0.0373$ , $wR_2 = 0.1027$                                     |
| Final R indexes [all data]                       | $R_1 = 0.0395$ , $wR_2 = 0.1046$                                     |
| Largest diff. peak/hole / e $\text{\AA}^{-3}$    | 0.32/-0.44                                                           |

**Table 2 Fractional Atomic Coordinates ( $\times 10^4$ ) and Equivalent Isotropic Displacement Parameters ( $\text{\AA}^2 \times 10^3$ ) for jww\_160815.  $U_{\text{eq}}$  is defined as 1/3 of the trace of the orthogonalised  $U_{ij}$  tensor.**

| Atom | x          | y           | z          | $U(\text{eq})$ |
|------|------------|-------------|------------|----------------|
| S1   | 2588.0(5)  | 4945.38(19) | 7948.3(5)  | 25.24(16)      |
| O2   | 3903.4(13) | 4442.0(6)   | 8860.8(14) | 26.2(3)        |
| O3   | 1551.3(15) | 4922.0(6)   | 9044.7(16) | 32.0(3)        |
| O4   | 7156.0(13) | 3738.6(6)   | 7577.1(16) | 28.4(3)        |
| O5   | 8710.7(14) | 2906.9(6)   | 7224.3(18) | 36.7(3)        |
| O6   | 3306.7(15) | 5544.3(6)   | 7652.9(16) | 32.6(3)        |
| C7   | 5212.5(19) | 4395.9(8)   | 8202(2)    | 26.1(4)        |
| C8   | 2165.3(19) | 4815.0(9)   | 4544(2)    | 28.0(4)        |
| C9   | 6146(2)    | 2030.5(9)   | 8213(2)    | 32.8(4)        |
| C10  | 1832.3(18) | 4561.2(8)   | 6014(2)    | 24.9(4)        |
| C11  | 119(2)     | 3591.6(10)  | 1293(2)    | 36.0(4)        |
| C12  | 927.6(19)  | 4007.4(8)   | 5986(2)    | 27.1(4)        |
| C13  | 1590(2)    | 4498.9(9)   | 3026(2)    | 29.8(4)        |
| C14  | 708.6(19)  | 3933.2(8)   | 2959(2)    | 27.6(4)        |
| C15  | 7545.4(19) | 3077.8(9)   | 7582(2)    | 28.4(4)        |
| C16  | 5243.1(19) | 3147.8(8)   | 8412(2)    | 26.7(4)        |
| C17  | 5775.9(19) | 3802.3(8)   | 8084(2)    | 25.7(4)        |
| C18  | 375.1(19)  | 3696.3(8)   | 4455(2)    | 28.1(4)        |
| C19  | 3945(2)    | 2929.3(9)   | 8921(2)    | 30.8(4)        |
| C20  | 6317.9(19) | 2705.6(9)   | 8083(2)    | 27.3(4)        |
| C21  | 4844(2)    | 1812.6(9)   | 8700(2)    | 36.3(4)        |
| C1   | 3777(2)    | 2254.8(10)  | 9056(3)    | 35.9(4)        |

**Table 3 Anisotropic Displacement Parameters ( $\text{\AA}^2 \times 10^3$ ) for jww\_160815. The Anisotropic displacement factor exponent takes the form:  $-2 \pi^2 [h^2 a^{*2} U_{11} + 2 h k a^* b^* U_{12} + \dots]$ .**

| Atom | $U_{11}$ | $U_{22}$ | $U_{33}$ | $U_{12}$ | $U_{13}$ | $U_{23}$  |
|------|----------|----------|----------|----------|----------|-----------|
| S1   | 23.3(3)  | 26.1(2)  | 26.0(3)  | 1.66(15) | 4.92(18) | -0.08(14) |
| O2   | 21.0(6)  | 29.3(6)  | 28.2(6)  | 1.4(5)   | 5.0(5)   | 1.8(5)    |
| O3   | 28.1(7)  | 39.3(7)  | 29.4(7)  | 6.1(5)   | 8.0(6)   | -0.5(5)   |
| O4   | 22.2(6)  | 26.8(6)  | 37.9(7)  | -2.0(5)  | 10.4(5)  | 0.1(5)    |
| O5   | 28.7(7)  | 35.1(7)  | 49.7(8)  | 1.7(5)   | 16.1(6)  | -1.6(6)   |
| O6   | 35.5(7)  | 26.0(6)  | 34.4(7)  | -0.8(5)  | 3.7(6)   | -0.3(5)   |
| C7   | 21.2(8)  | 29.1(8)  | 28.1(9)  | -2.7(6)  | 5.5(7)   | 0.9(6)    |
| C8   | 24.2(9)  | 29.9(9)  | 29.9(9)  | -3.8(7)  | 5.7(7)   | 2.1(7)    |
| C9   | 30.5(10) | 27.9(9)  | 38(1)    | -0.6(7)  | 3.2(8)   | 0.6(7)    |
| C10  | 18.3(8)  | 28.8(8)  | 27.5(9)  | 1.9(6)   | 4.5(7)   | -0.5(6)   |
| C11  | 36.8(11) | 38.1(10) | 32.7(10) | -2.8(8)  | 6.6(8)   | -4.0(8)   |
| C12  | 22.1(8)  | 31.5(9)  | 28.7(9)  | 0.3(6)   | 7.6(7)   | 3.1(7)    |
| C13  | 26.0(9)  | 37.2(10) | 26.9(9)  | -0.6(7)  | 7.6(7)   | 3.3(7)    |
| C14  | 20.1(8)  | 31.6(9)  | 31.0(9)  | 4.0(7)   | 5.2(7)   | -1.1(7)   |
| C15  | 24.7(9)  | 27.7(9)  | 32.4(9)  | -0.0(7)  | 5.2(7)   | -1.6(7)   |
| C16  | 23.4(9)  | 28.3(9)  | 26.7(9)  | -2.3(6)  | 1.9(7)   | 1.2(6)    |
| C17  | 19.8(8)  | 30.1(9)  | 27.2(9)  | -2.7(6)  | 4.9(7)   | -0.5(6)   |
| C18  | 20.7(9)  | 28.0(8)  | 35.4(10) | -1.2(6)  | 5.6(7)   | 0.5(7)    |
| C19  | 23.4(9)  | 34.8(9)  | 34.4(9)  | -2.6(7)  | 6.9(7)   | 2.9(7)    |
| C20  | 23.1(9)  | 28.8(9)  | 28.8(9)  | -1.3(6)  | 2.8(7)   | 0.5(7)    |
| C21  | 36.6(11) | 28.4(9)  | 41.1(11) | -7.6(7)  | 2.2(8)   | 4.3(7)    |
| C1   | 29(1)    | 37.9(10) | 40.5(11) | -9.3(8)  | 7.0(8)   | 4.3(8)    |

**Table 4 Bond Lengths for jww\_160815.**

| Atom | Atom | Length/ $\text{\AA}$ | Atom | Atom | Length/ $\text{\AA}$ |
|------|------|----------------------|------|------|----------------------|
| S1   | O2   | 1.6181(12)           | C9   | C21  | 1.387(3)             |
| S1   | O3   | 1.4205(13)           | C10  | C12  | 1.389(2)             |
| S1   | O6   | 1.4256(13)           | C11  | C14  | 1.507(2)             |
| S1   | C10  | 1.7495(17)           | C12  | C18  | 1.384(2)             |
| O2   | C7   | 1.397(2)             | C13  | C14  | 1.394(3)             |
| O4   | C15  | 1.391(2)             | C14  | C18  | 1.395(2)             |
| O4   | C17  | 1.395(2)             | C15  | C20  | 1.467(2)             |
| O5   | C15  | 1.198(2)             | C16  | C17  | 1.461(2)             |

|    |     |          |     |     |          |
|----|-----|----------|-----|-----|----------|
| C7 | C17 | 1.323(2) | C16 | C19 | 1.393(2) |
| C8 | C10 | 1.388(2) | C16 | C20 | 1.389(2) |
| C8 | C13 | 1.384(3) | C19 | C1  | 1.390(3) |
| C9 | C20 | 1.391(2) | C21 | C1  | 1.392(3) |

**Table 5 Bond Angles for jww\_160815.**

| Atom | Atom | Atom | Angle/°    | Atom | Atom | Atom | Angle/°    |
|------|------|------|------------|------|------|------|------------|
| O3   | S1   | O2   | 102.02(7)  | C18  | C14  | C13  | 118.73(16) |
| O6   | S1   | O2   | 107.82(7)  | O5   | C15  | O4   | 120.90(15) |
| O6   | S1   | O3   | 121.10(8)  | C20  | C15  | O4   | 107.29(14) |
| C10  | S1   | O2   | 103.17(7)  | C20  | C15  | O5   | 131.81(17) |
| C10  | S1   | O3   | 111.29(8)  | C19  | C16  | C17  | 132.42(16) |
| C10  | S1   | O6   | 109.61(8)  | C20  | C16  | C17  | 106.76(15) |
| C7   | O2   | S1   | 117.53(10) | C20  | C16  | C19  | 120.81(16) |
| C17  | O4   | C15  | 109.18(12) | C7   | C17  | O4   | 119.04(15) |
| C17  | C7   | O2   | 117.19(15) | C16  | C17  | O4   | 108.44(14) |
| C13  | C8   | C10  | 118.58(16) | C16  | C17  | C7   | 132.52(16) |
| C21  | C9   | C20  | 116.93(17) | C14  | C18  | C12  | 120.98(16) |
| C8   | C10  | S1   | 119.03(13) | C1   | C19  | C16  | 116.86(17) |
| C12  | C10  | S1   | 119.39(13) | C15  | C20  | C9   | 129.42(17) |
| C12  | C10  | C8   | 121.57(16) | C16  | C20  | C9   | 122.26(16) |
| C18  | C12  | C10  | 118.82(16) | C16  | C20  | C15  | 108.31(15) |
| C14  | C13  | C8   | 121.28(16) | C1   | C21  | C9   | 120.94(17) |
| C13  | C14  | C11  | 120.24(16) | C21  | C1   | C19  | 122.18(17) |
| C18  | C14  | C11  | 121.03(16) |      |      |      |            |

**Table 6 Hydrogen Atom Coordinates ( $\text{\AA} \times 10^4$ ) and Isotropic Displacement Parameters ( $\text{\AA}^2 \times 10^3$ ) for jww\_160815.**

| Atom | x          | y          | z       | U(eq)   |
|------|------------|------------|---------|---------|
| H7   | 5678.5(19) | 4774.7(8)  | 7854(2) | 31.3(4) |
| H8   | 2774.8(19) | 5197.5(9)  | 4579(2) | 33.7(4) |
| H9   | 6885(2)    | 1732.5(9)  | 7978(2) | 39.3(5) |
| H11b | -84(16)    | 3916.9(12) | 380(3)  | 54.0(7) |
| H11a | 883(7)     | 3278(5)    | 1082(9) | 54.0(7) |
| H11c | -824(9)    | 3358(6)    | 1335(7) | 54.0(7) |
| H12  | 692.1(19)  | 3844.9(8)  | 7000(2) | 32.5(4) |
| H13  | 1801(2)    | 4670.7(9)  | 2009(2) | 35.7(5) |

|     |            |            |         |         |
|-----|------------|------------|---------|---------|
| H18 | -240.4(19) | 3315.8(8)  | 4422(2) | 33.7(5) |
| H19 | 3209(2)    | 3227.3(9)  | 9164(2) | 36.9(5) |
| H21 | 4679(2)    | 1354.9(9)  | 8793(2) | 43.6(5) |
| H1  | 2905(2)    | 2090.2(10) | 9403(3) | 43.0(5) |

## IX. References

1. (a) Gøgsig, T. M.; Søbbjerg, L. S.; Lindhardt (néé Hansen), A. T.; Jensen, K. L.; Skrydstrup, T.; *J. Org. Chem.* 2008, **73**, 3404; (b) Zhang, B.; Zhang, X. *Chem. Commun.* 2016, **52**, 1238.
2. L. Wang, Y. B. Xie, N. Y. Huang, J. Y. Yan, W. M. Hu, M. G. Liu, M. W. Ding, *ACS Catal.* 2016, **6**, 4010.
3. (a) M. J. Sarma, A. J. Borah, K. K. Rajbongshi, P. Phukan, *Tetrahedron Lett.* 2015, **56**, 7008; (b) B. Liu, B.-F. Shi, *Tetrahedron Lett.* 2015, **56**, 15; (c) R. J. Wakeham, J. E. Taylor, S. D. Bull, J. A. Morris, J. M. J. Williams, *Org. Lett.* 2013, **15**, 702; (d) F. Péron, C. Fossey, T. Cailly, F. Fabis, *Org. Lett.* 2012, **14**, 1827; (e) A. J. Borah, P. Phukan, *Chem. Commun.* 2012, **43**, 5491; (f) T. M. U. Ton, C. Tejo, S. Tania, J. W. W. Chang, P. W. H. Chan, *J. Org. Chem.* 2011, **42**, 4894; (g) C. Raji Reddy, B. Mahipal, S. R. Yaragorla, *Tetrahedron Lett.* 2007, **48**, 7528.
4. H. Zhang, C.-B. Zhou, Q.-Y. Chen, J.-C. Xiao, R. Hong, *Org. Lett.* 2011, **13**, 560.
5. J. Pan, X. Wang, Y. Zhang and S. L. Buchwald, *Org. Lett.*, 2011, **13**, 4974.
6. a) V. Ry, A. Couture, E. Deniau, S. Lebrun, P. Grandclaudon, *Tetrahedron* 2005, **61**, 665; (b) A. Couture, E. Deniau, P. Grandclaudon, H. Rybalko-Rosen, S. Léonce, B. Pfeiffer, P. Renard, *Bioorg. Med. Chem. Lett.* 2002, **12**, 3557.
7. J. K. Kim, Y. H. Kim, H. T. Nam, B. T. Kim, J.-N. Heo, *Org. Lett.* 2008, **10**, 3543.

## X. NMR Spectra

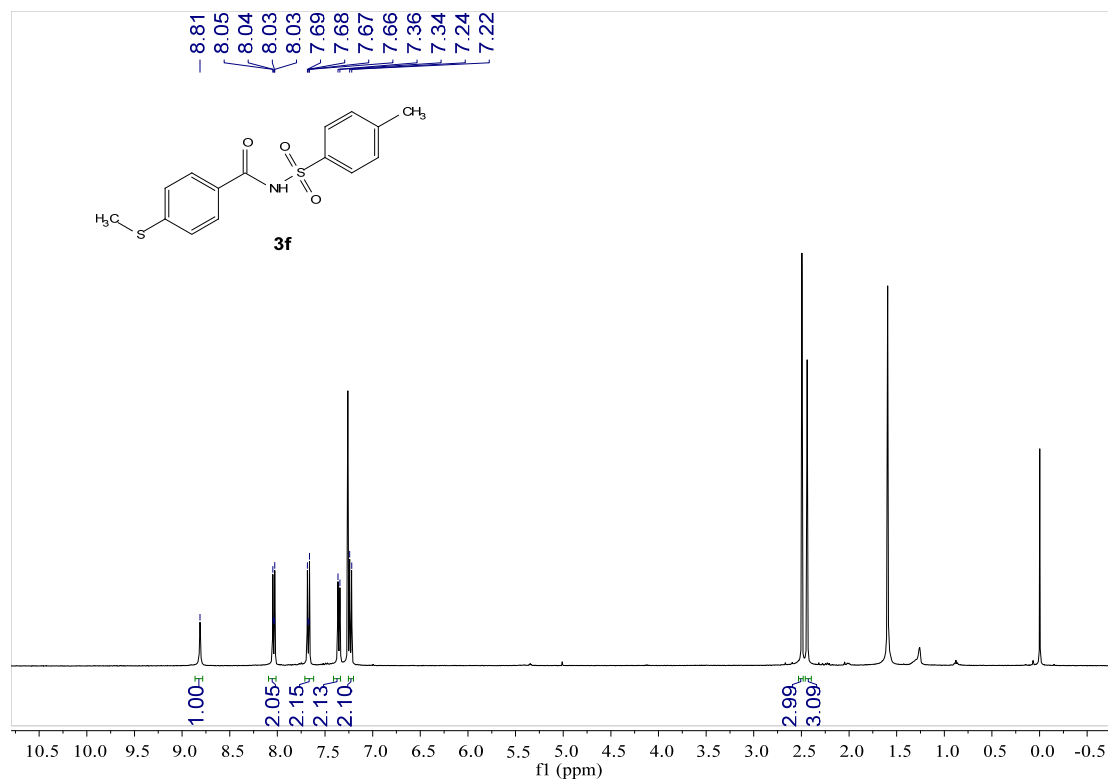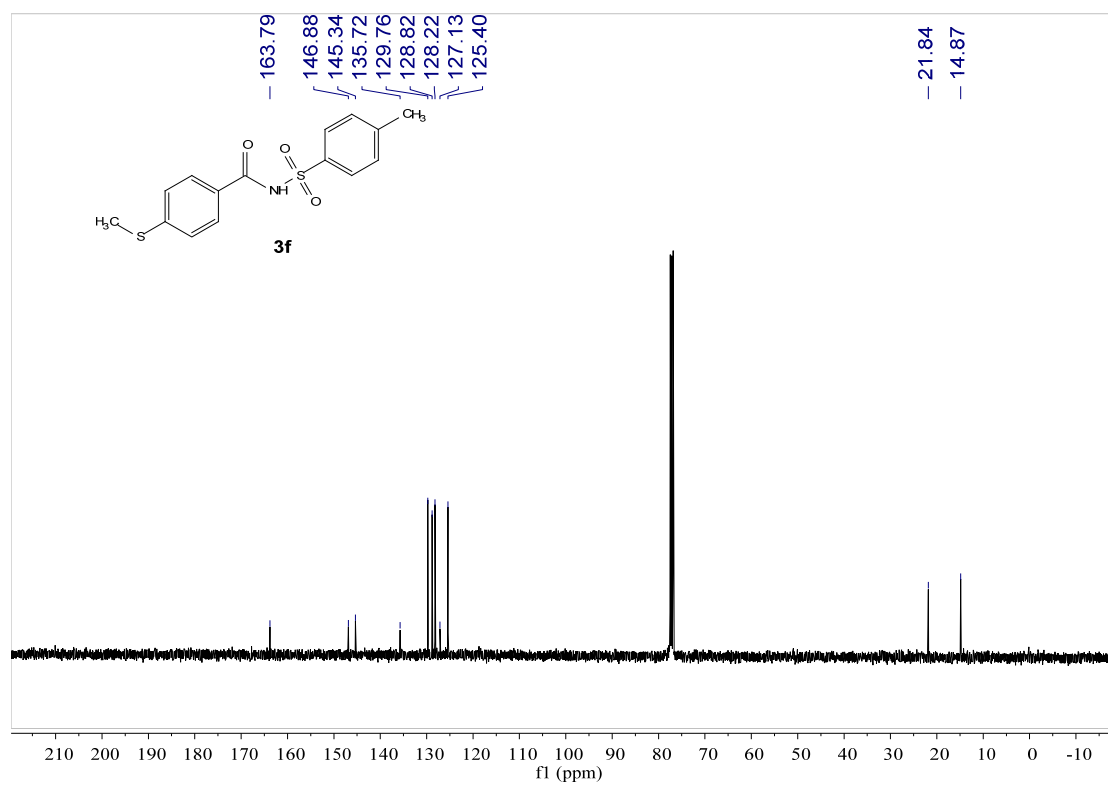

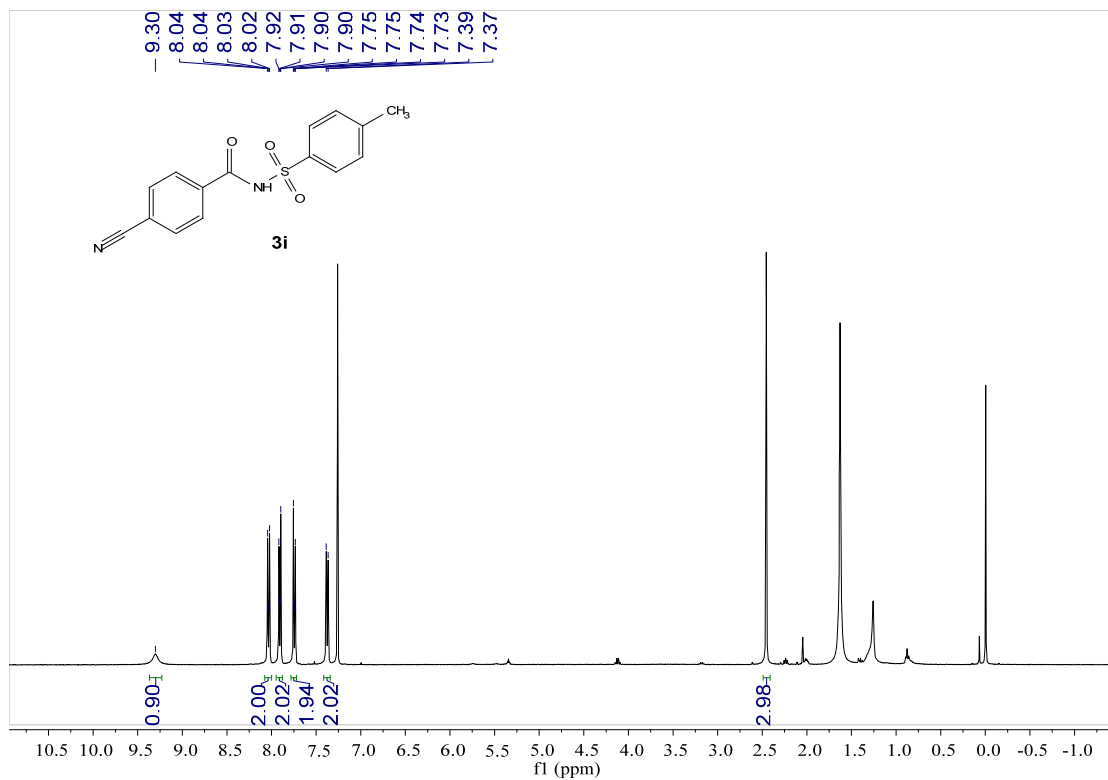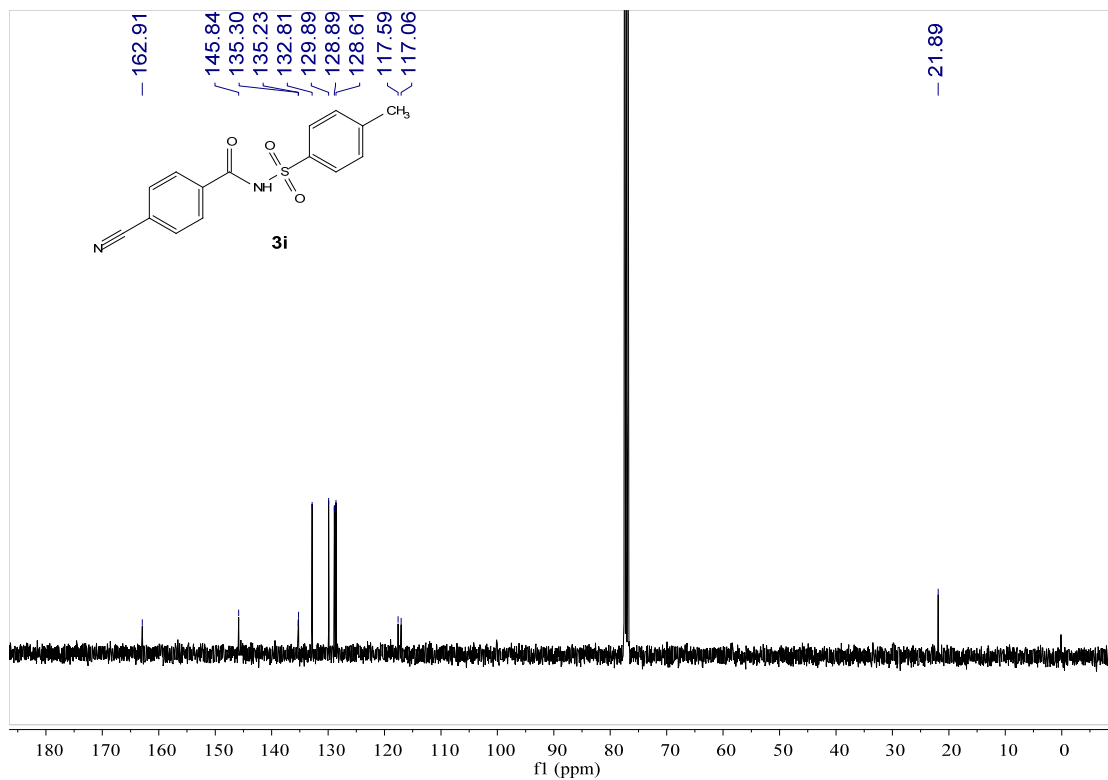

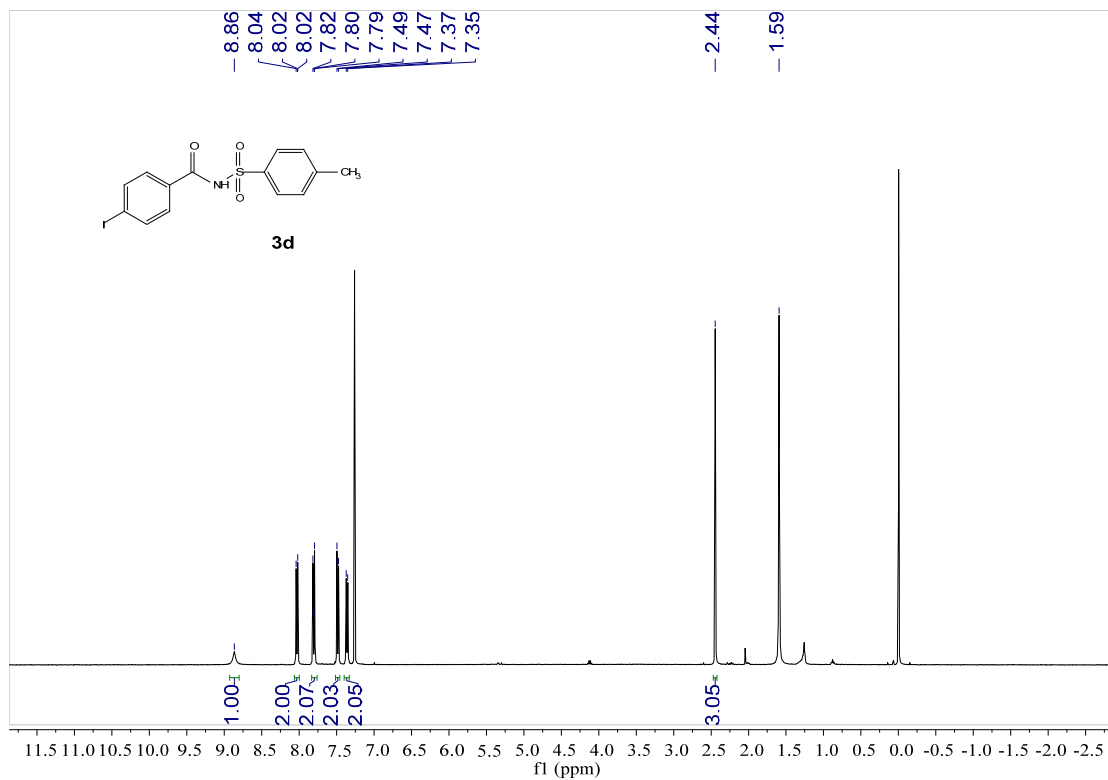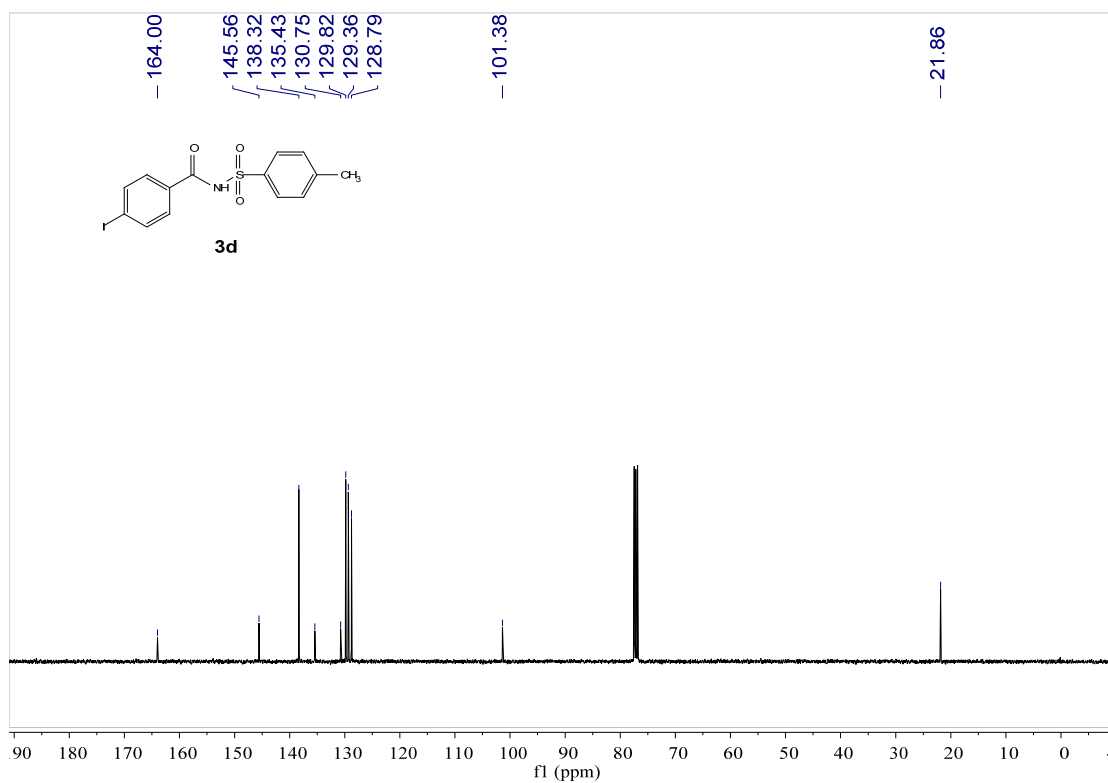



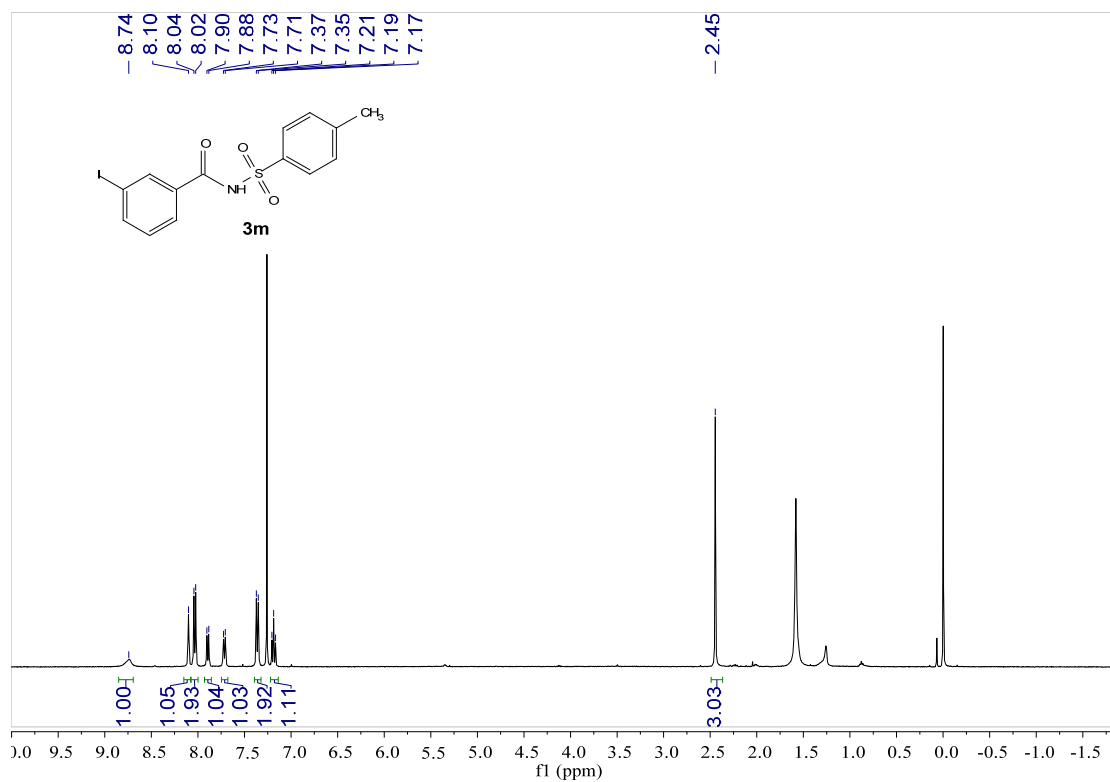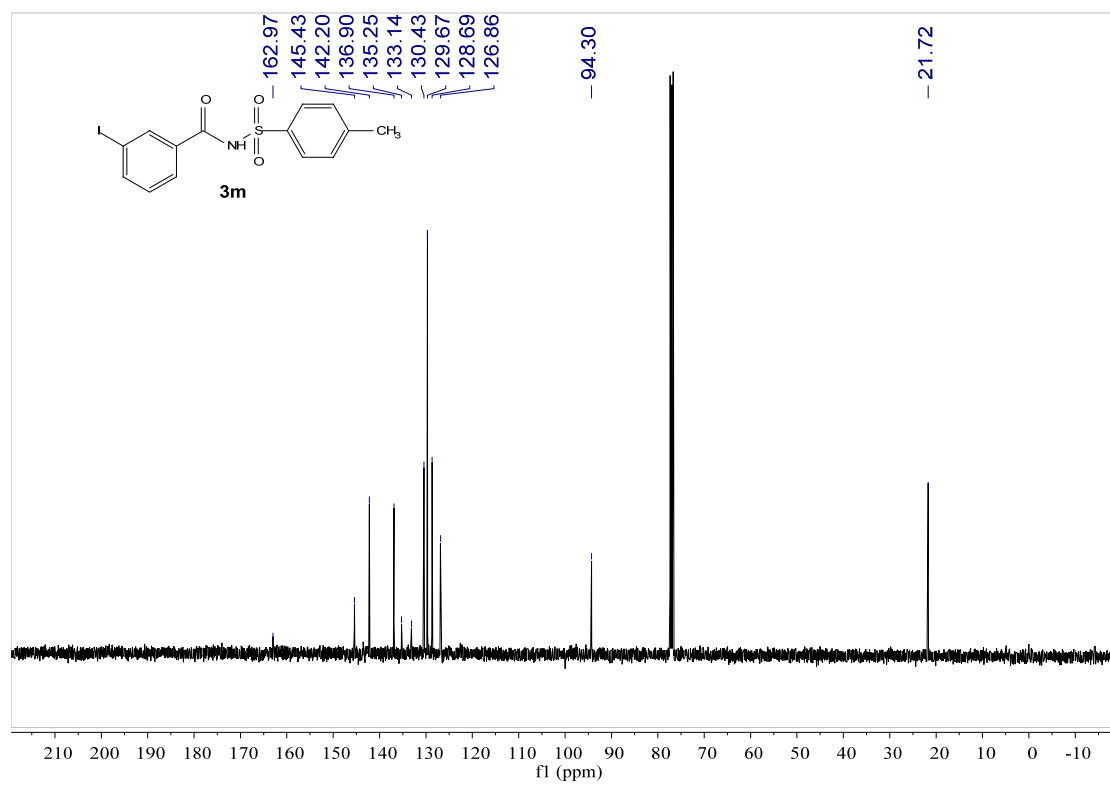

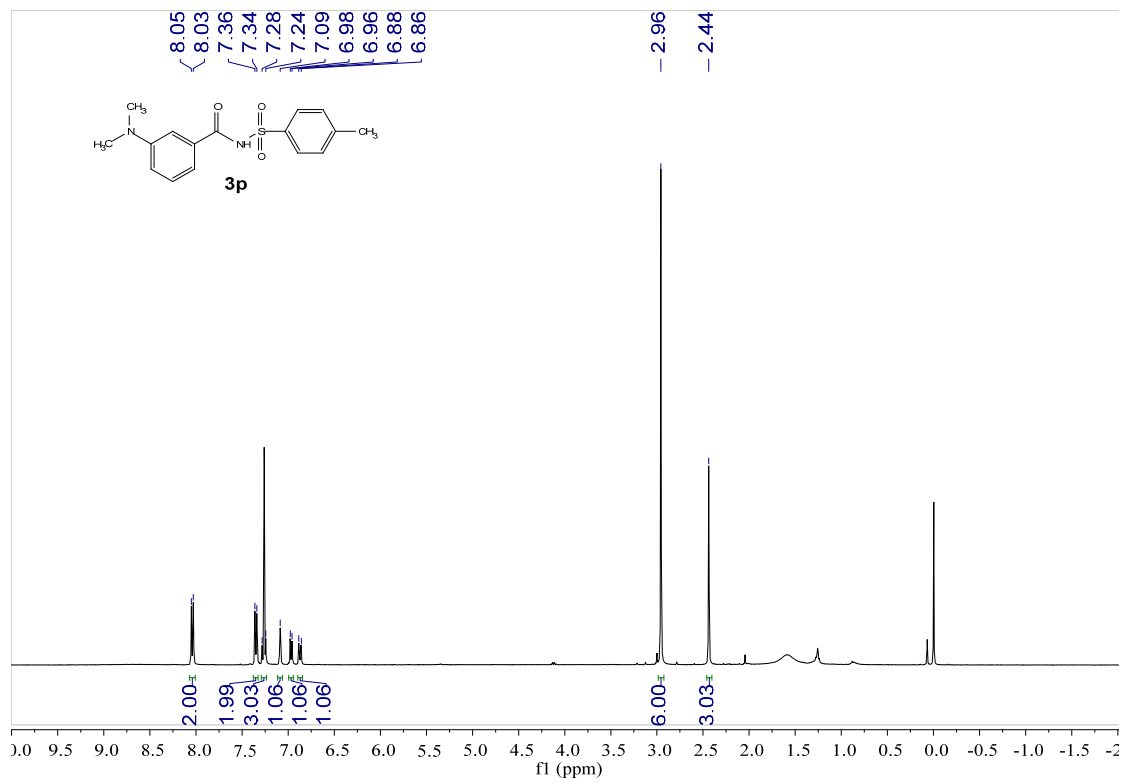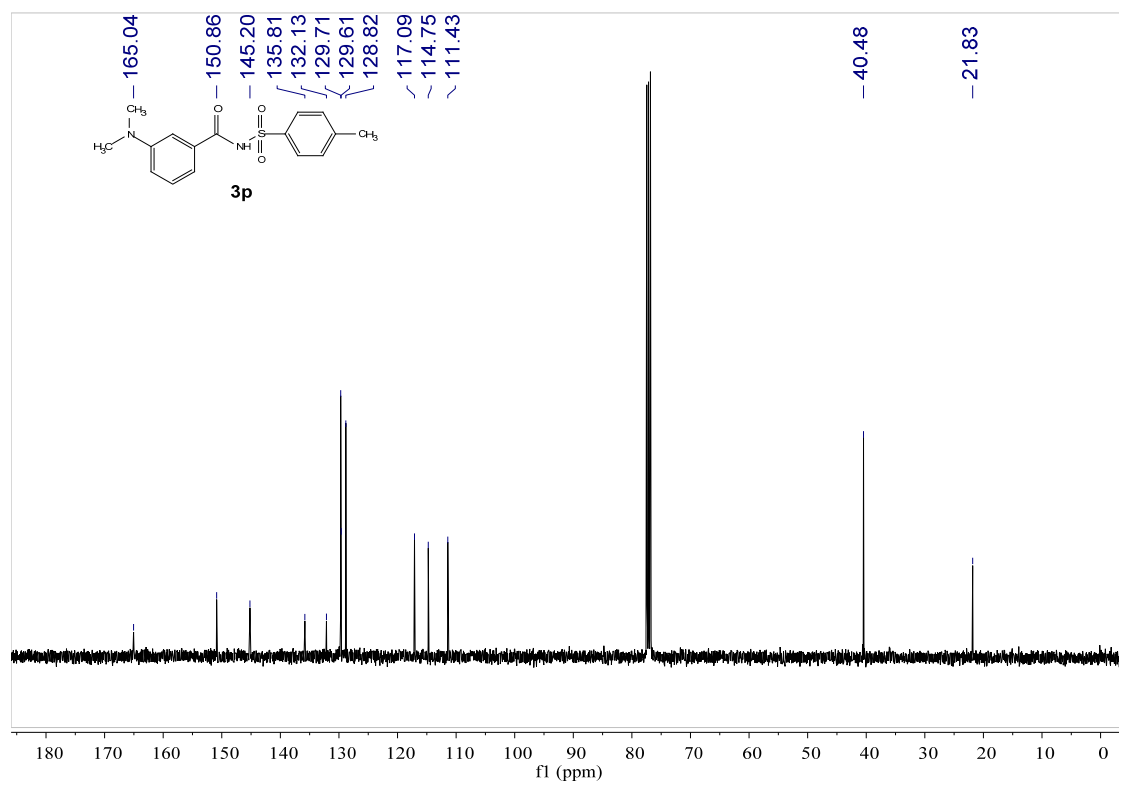

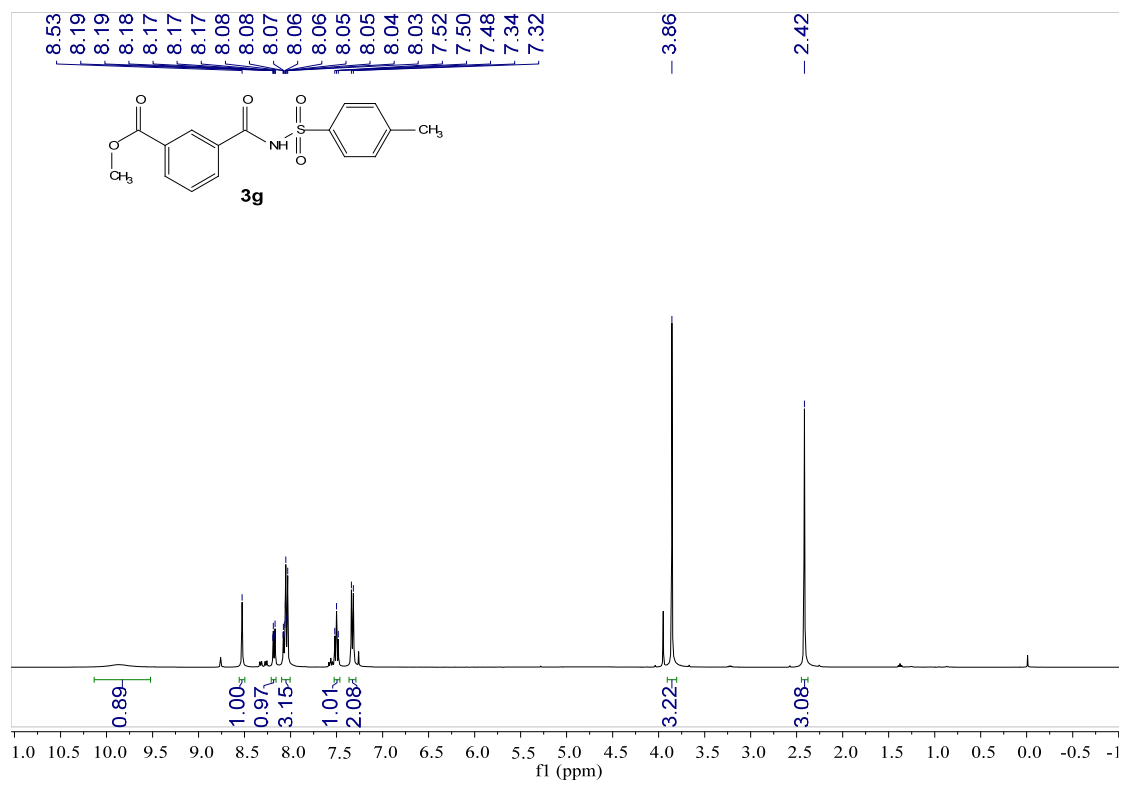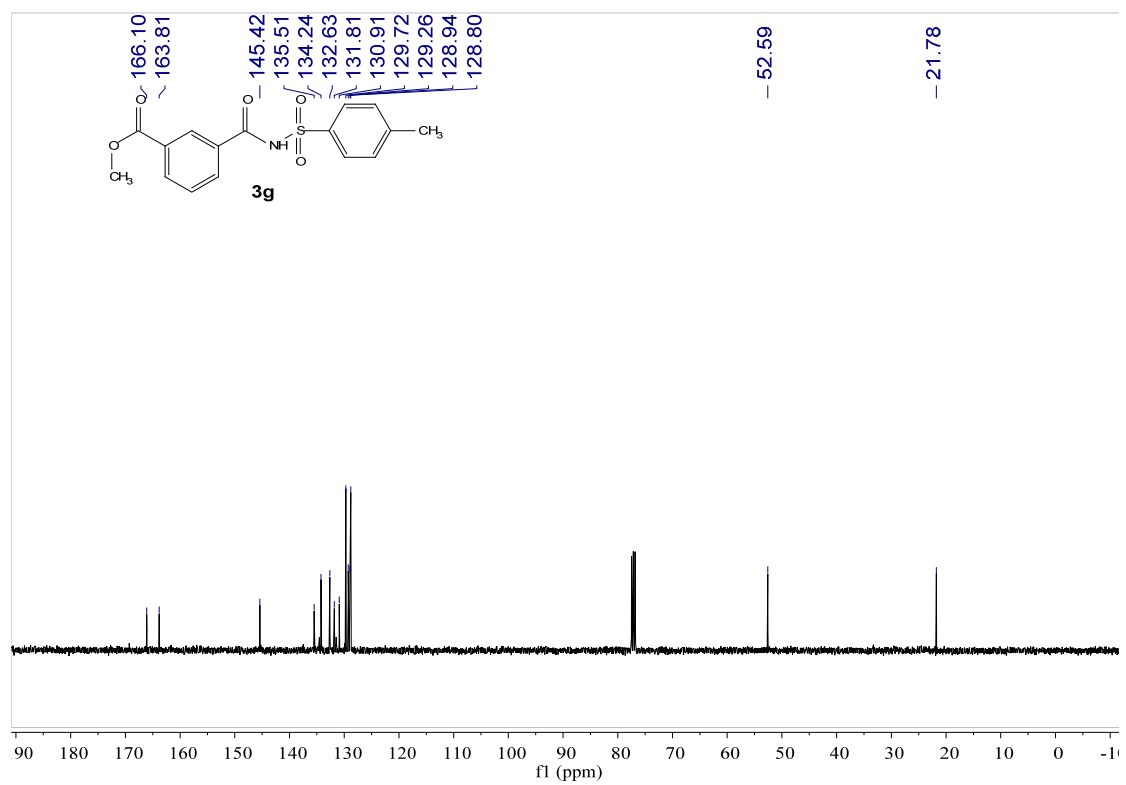

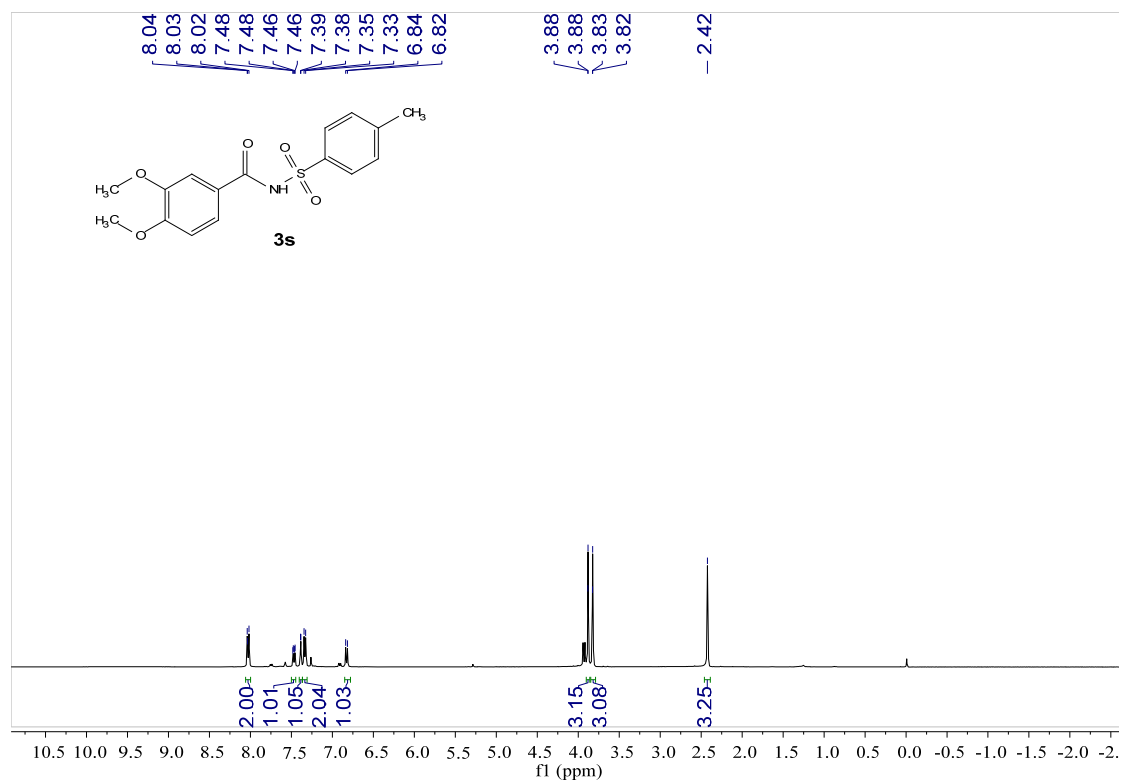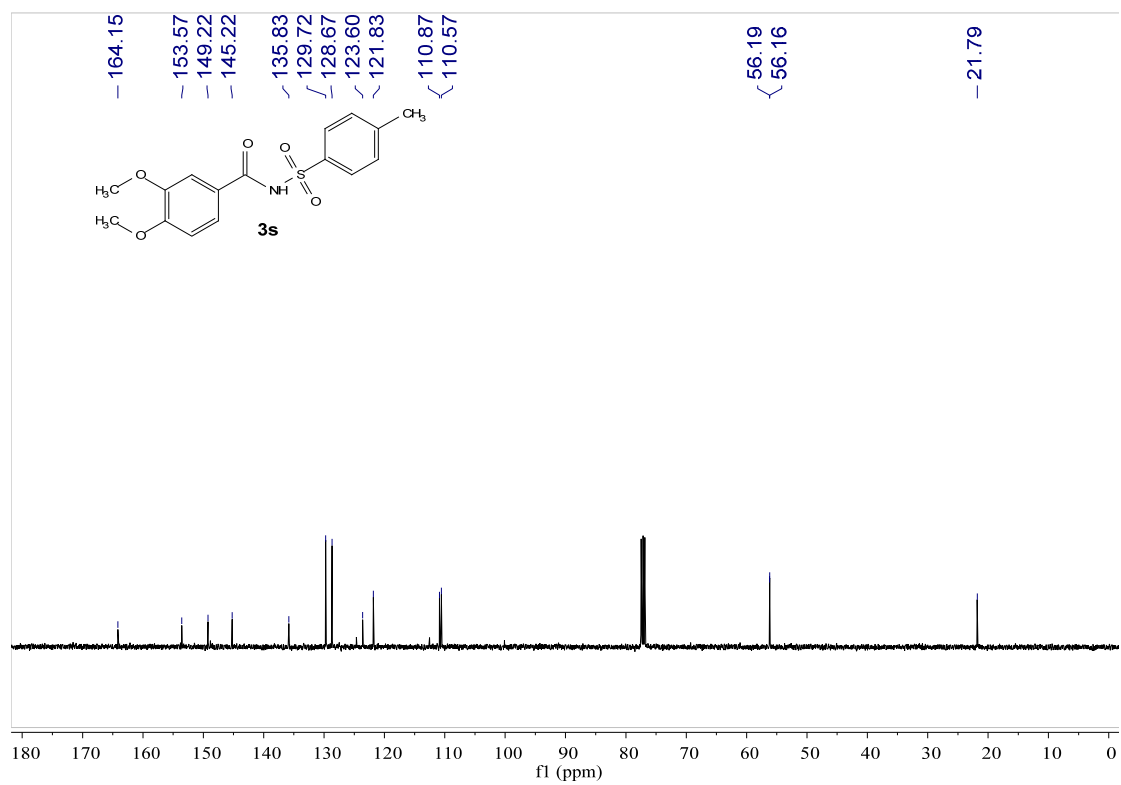

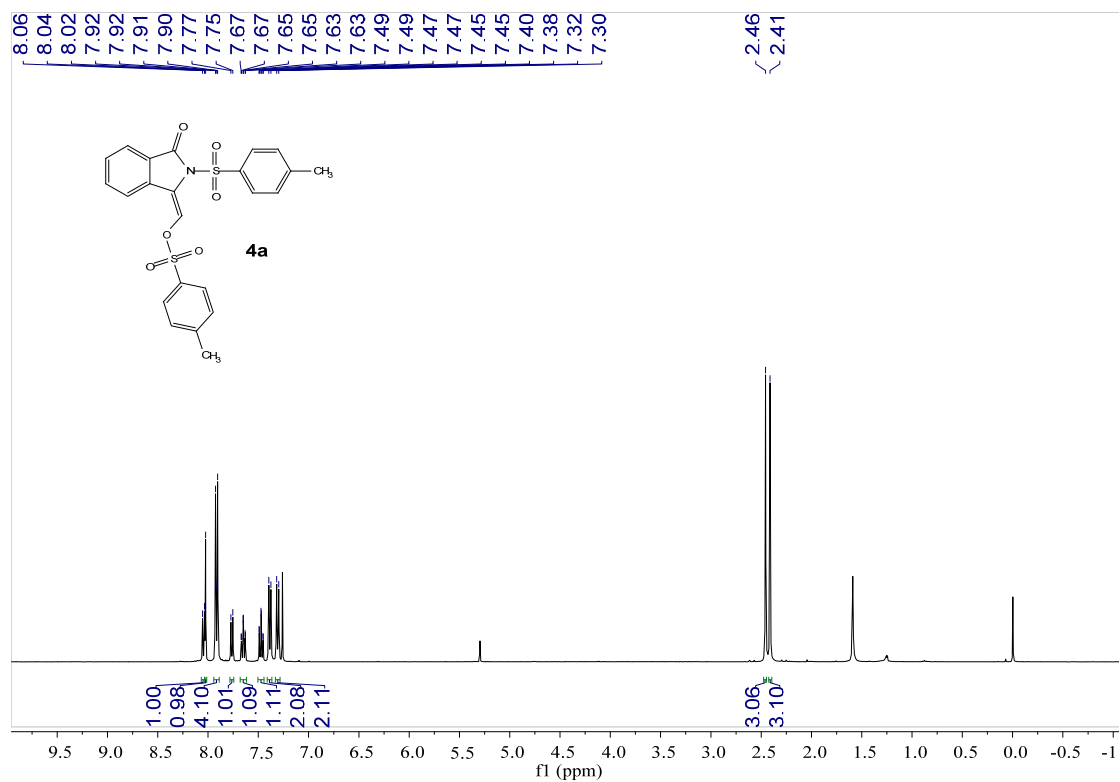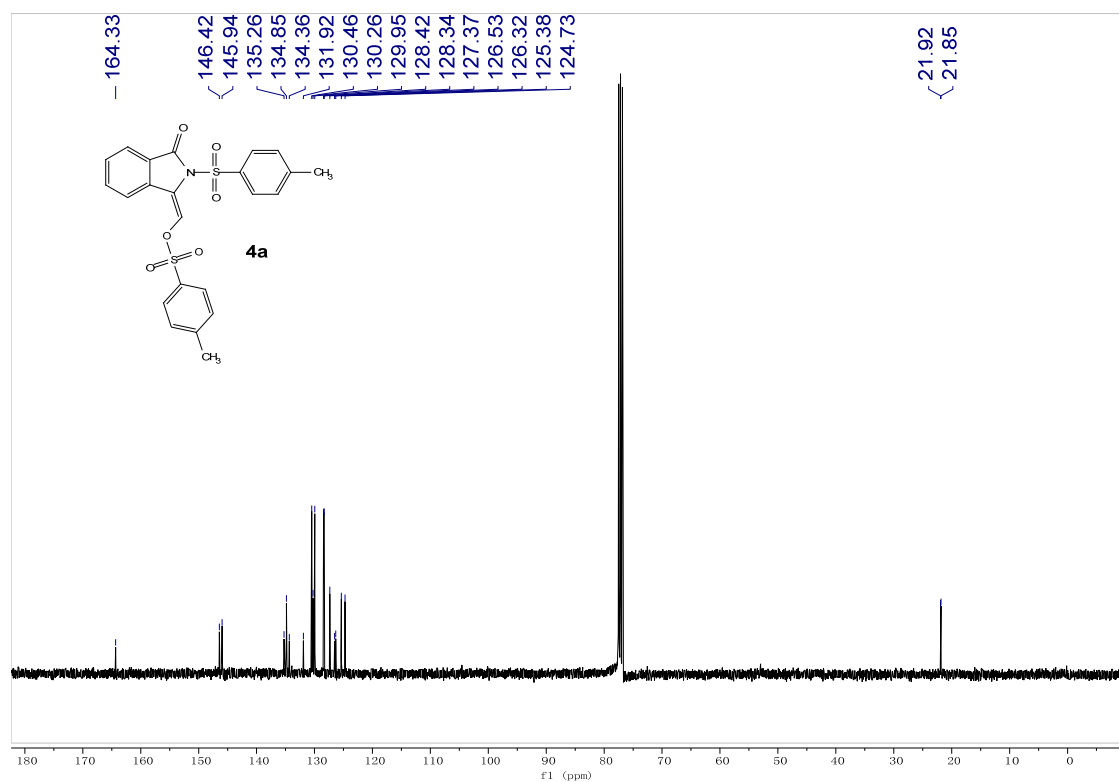

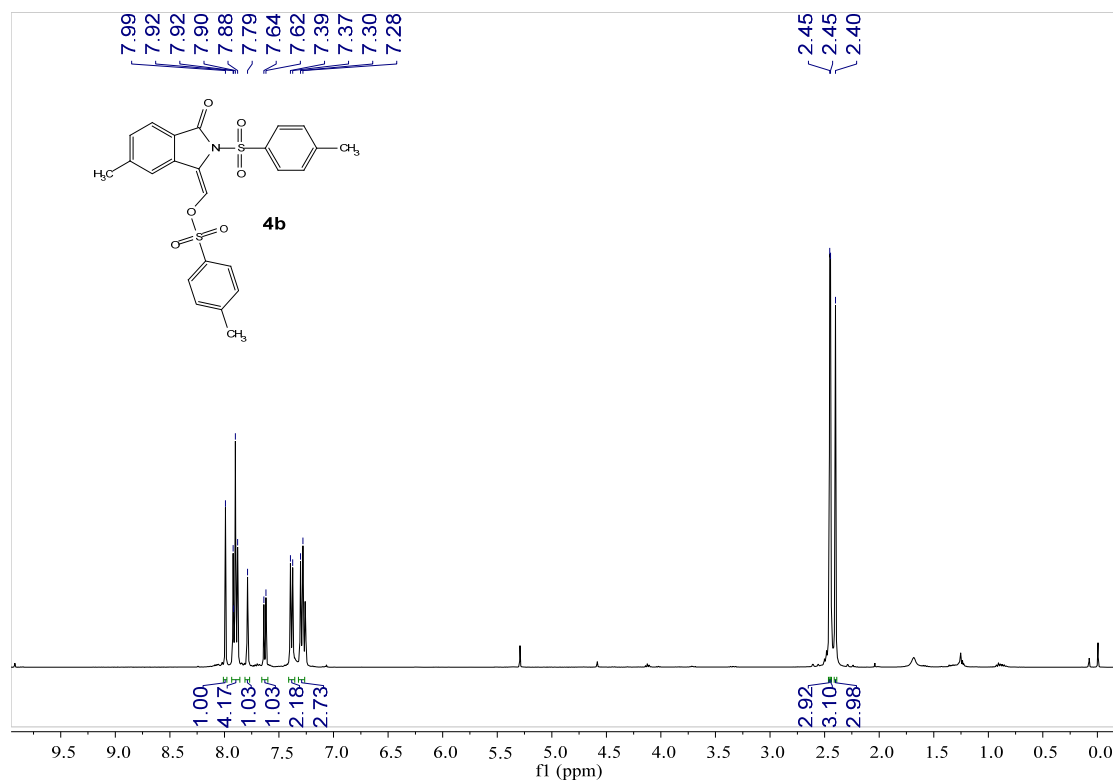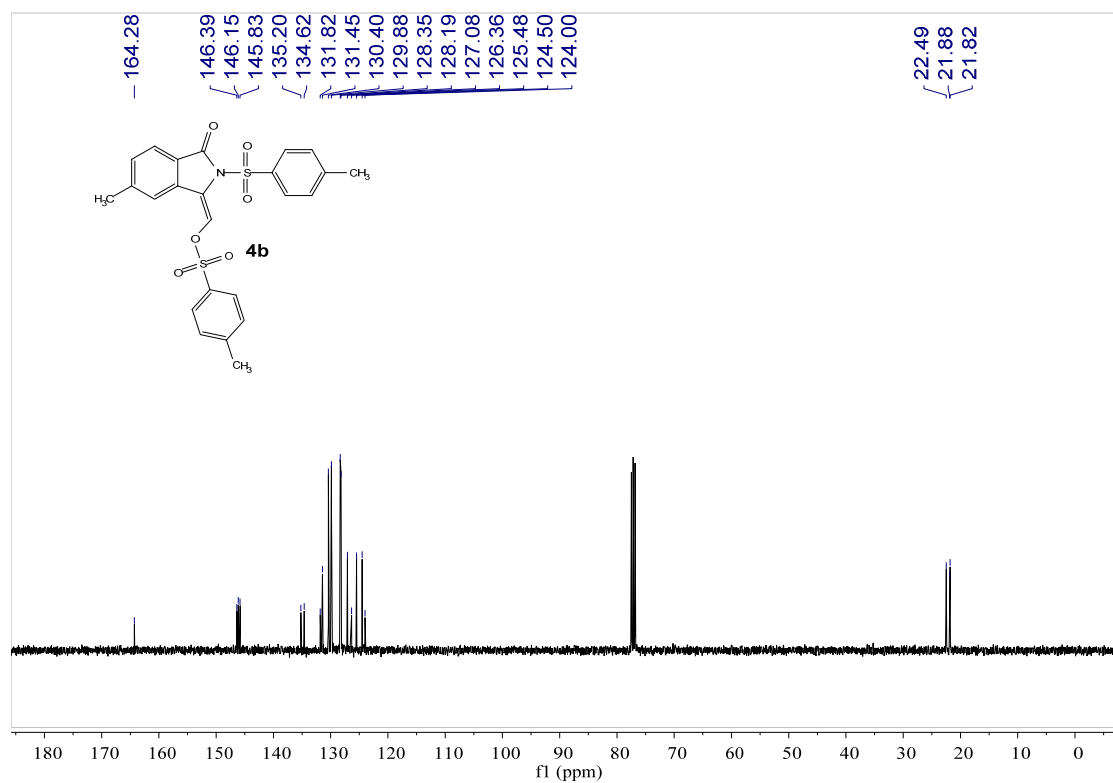

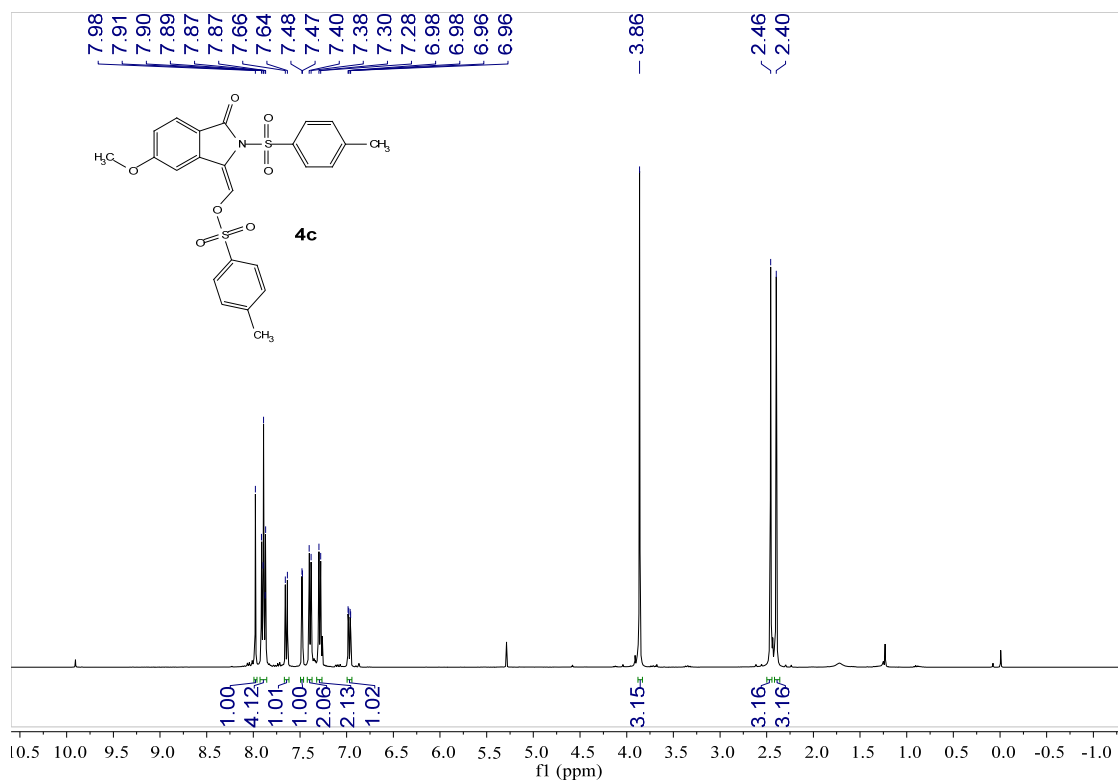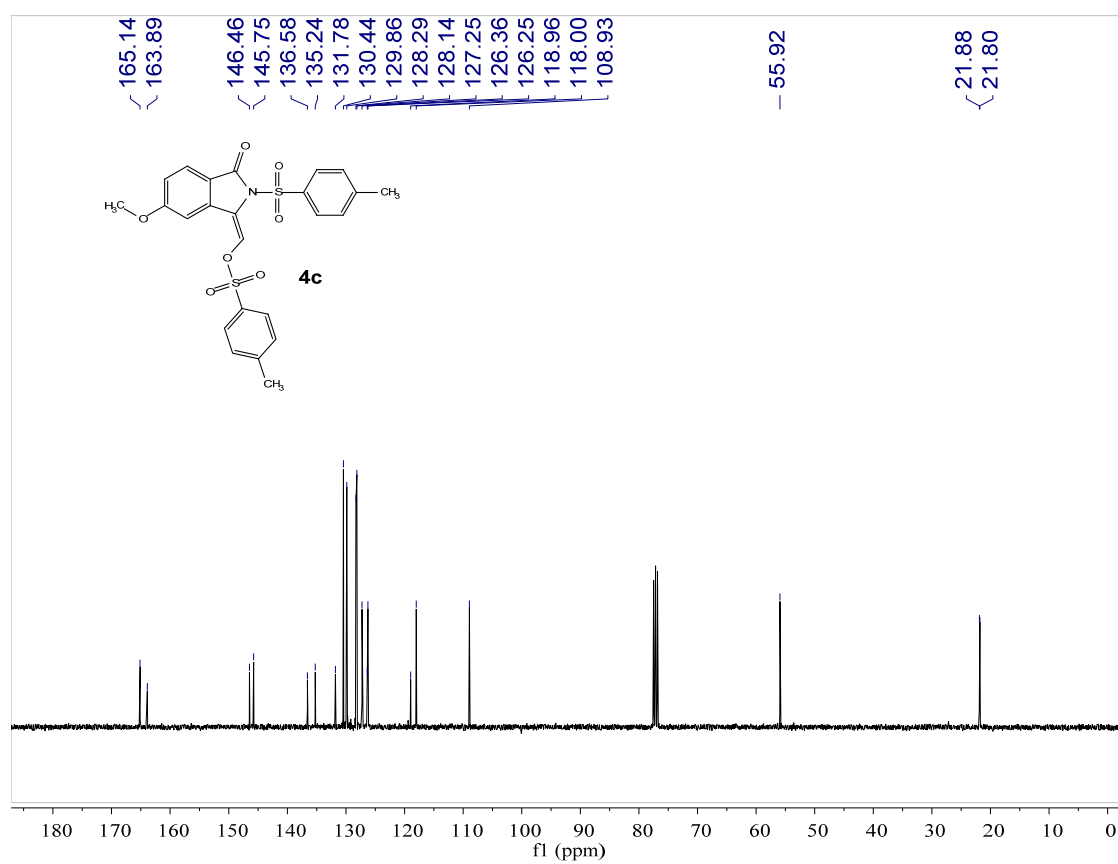

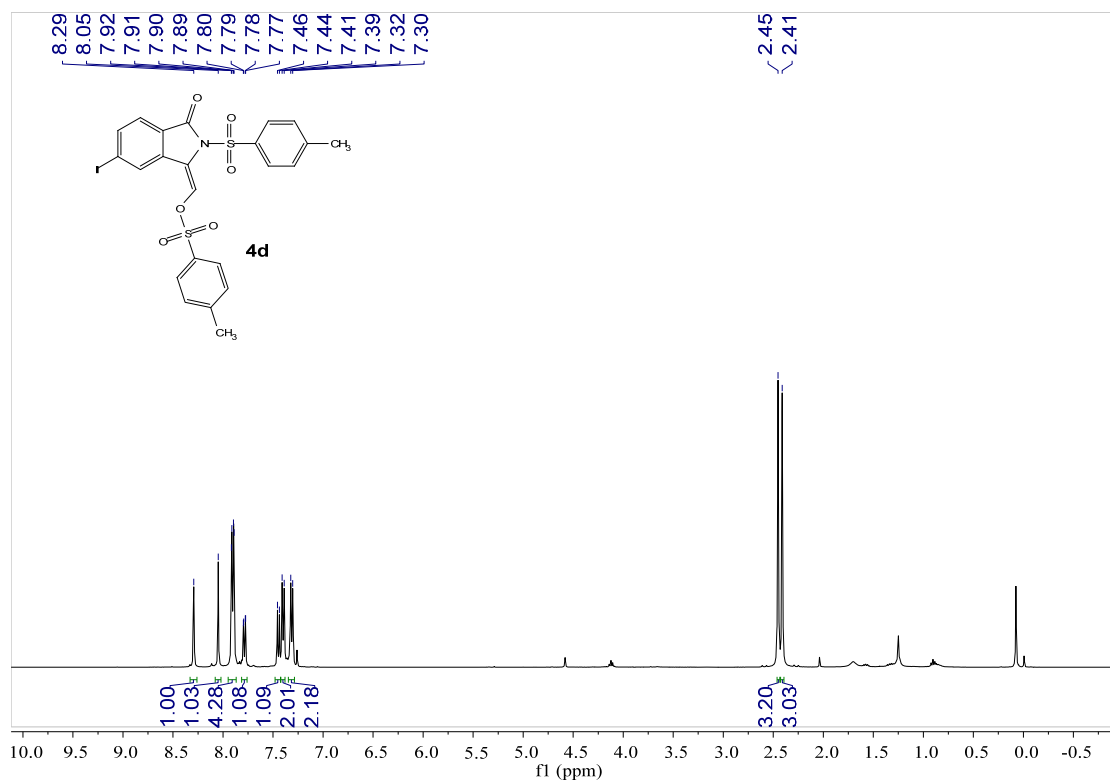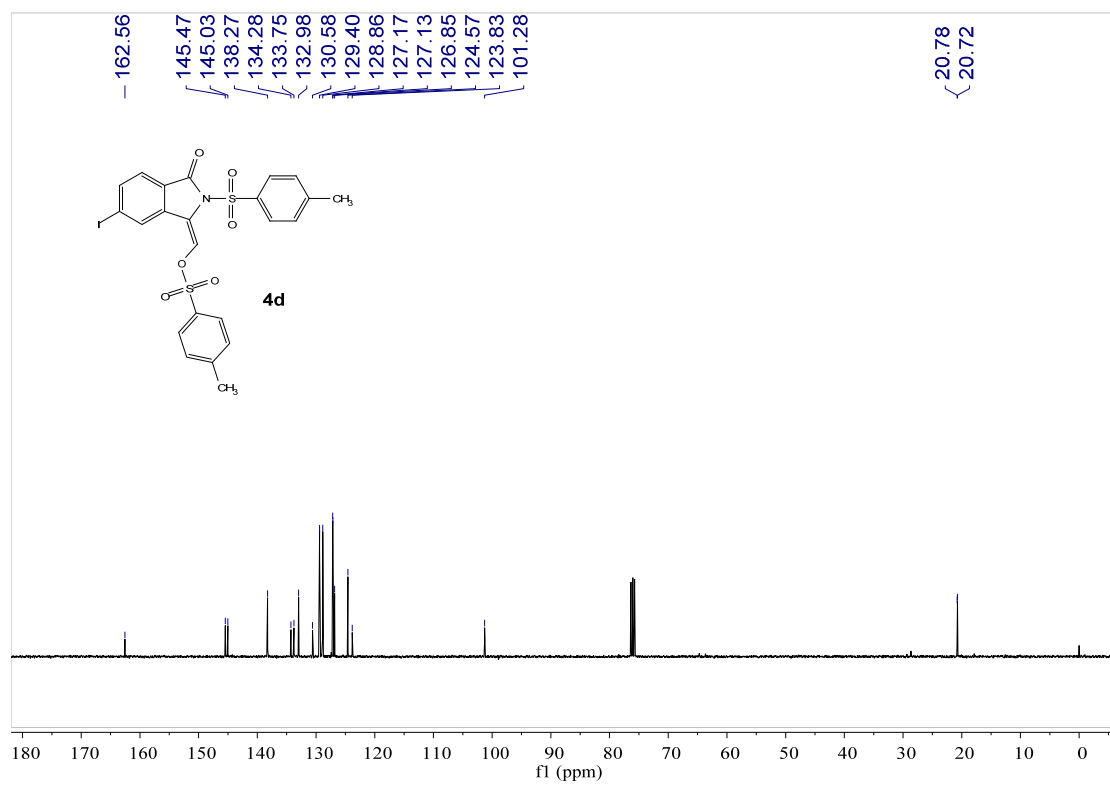



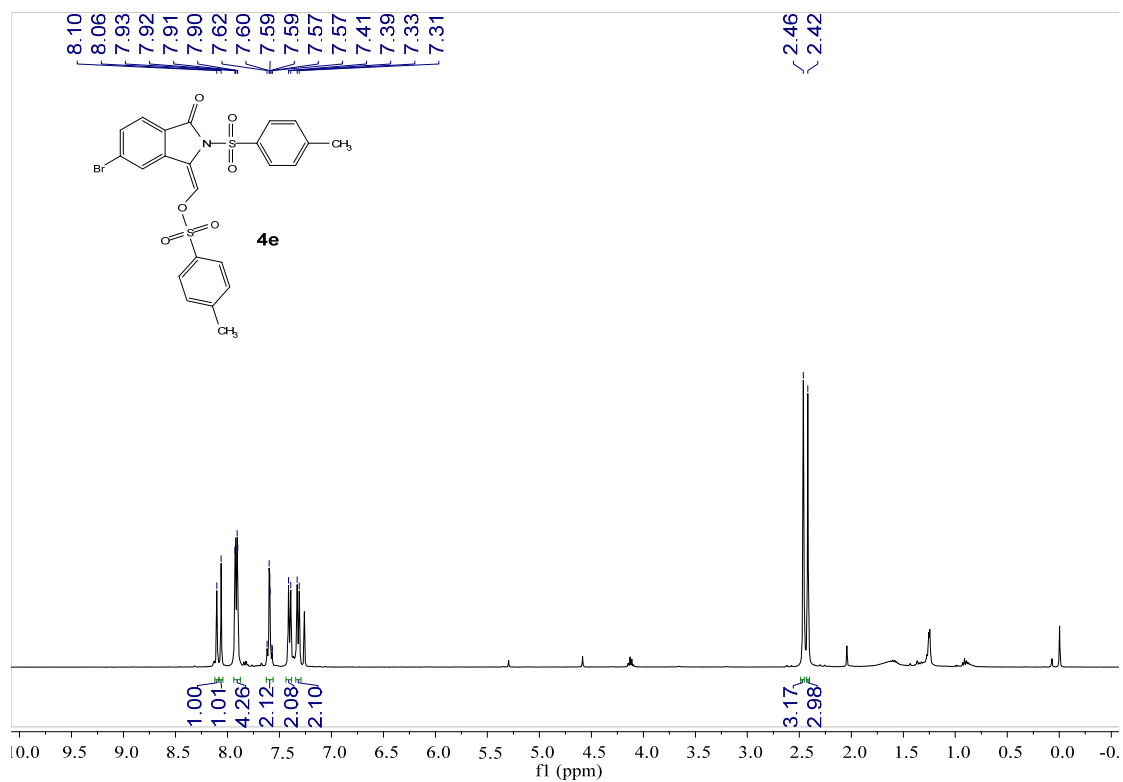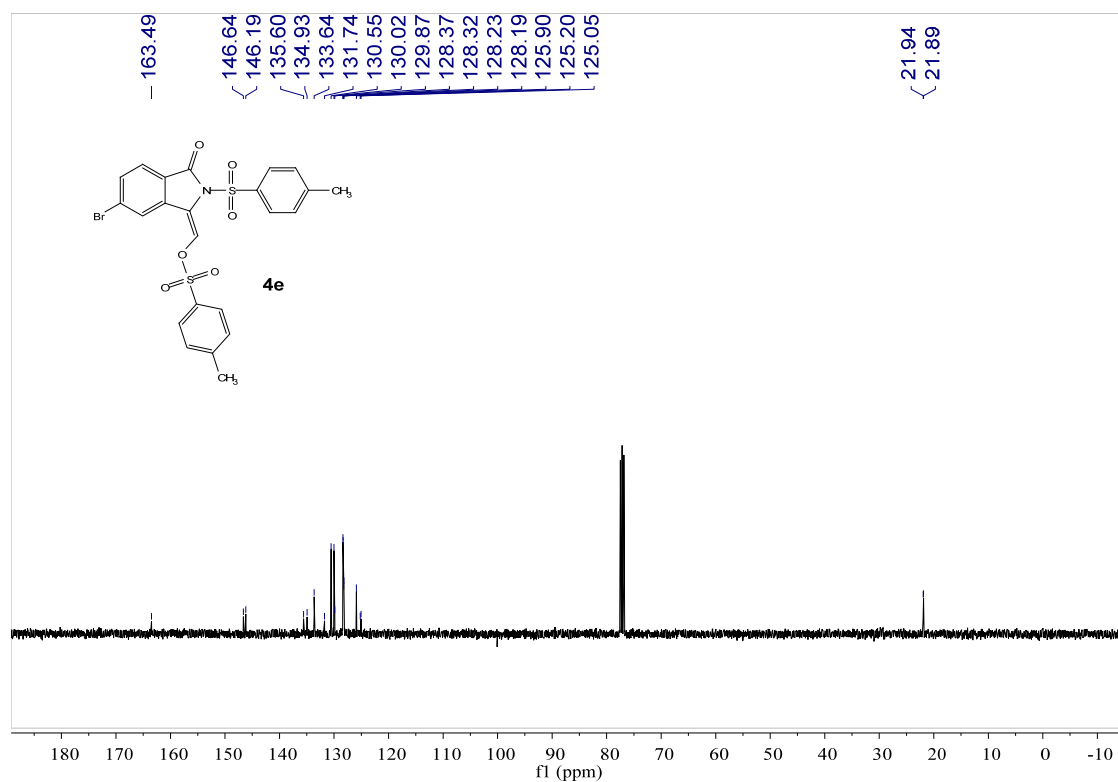

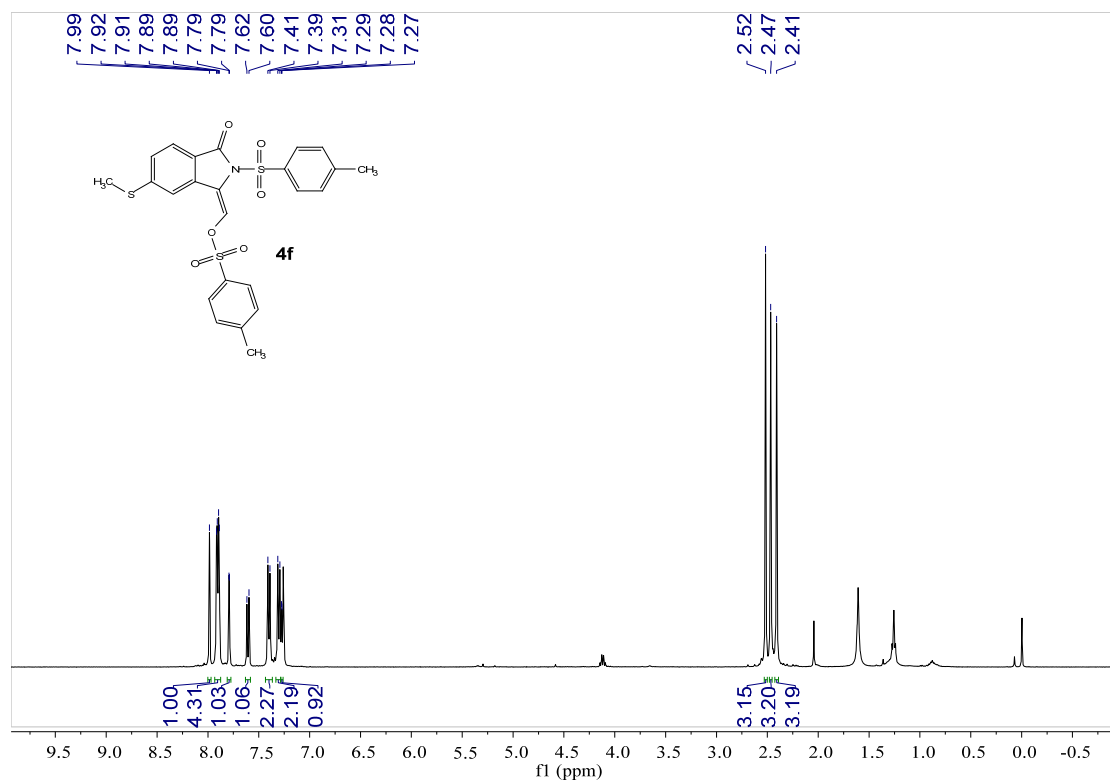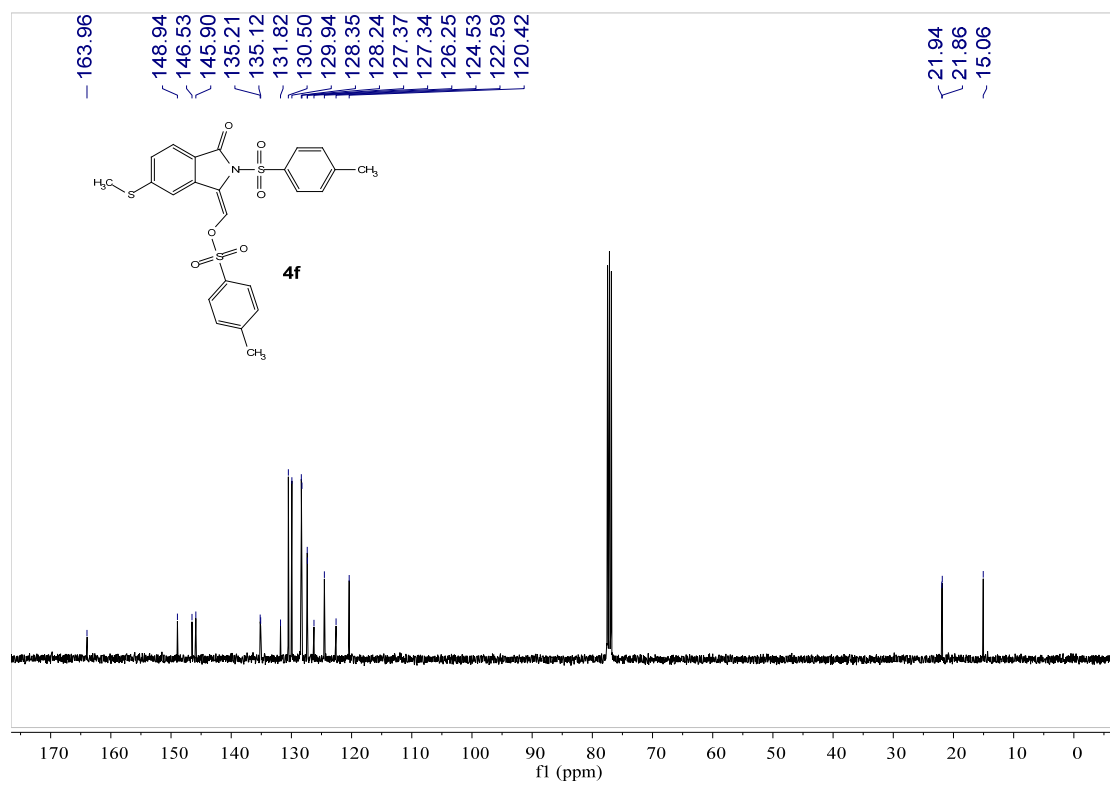

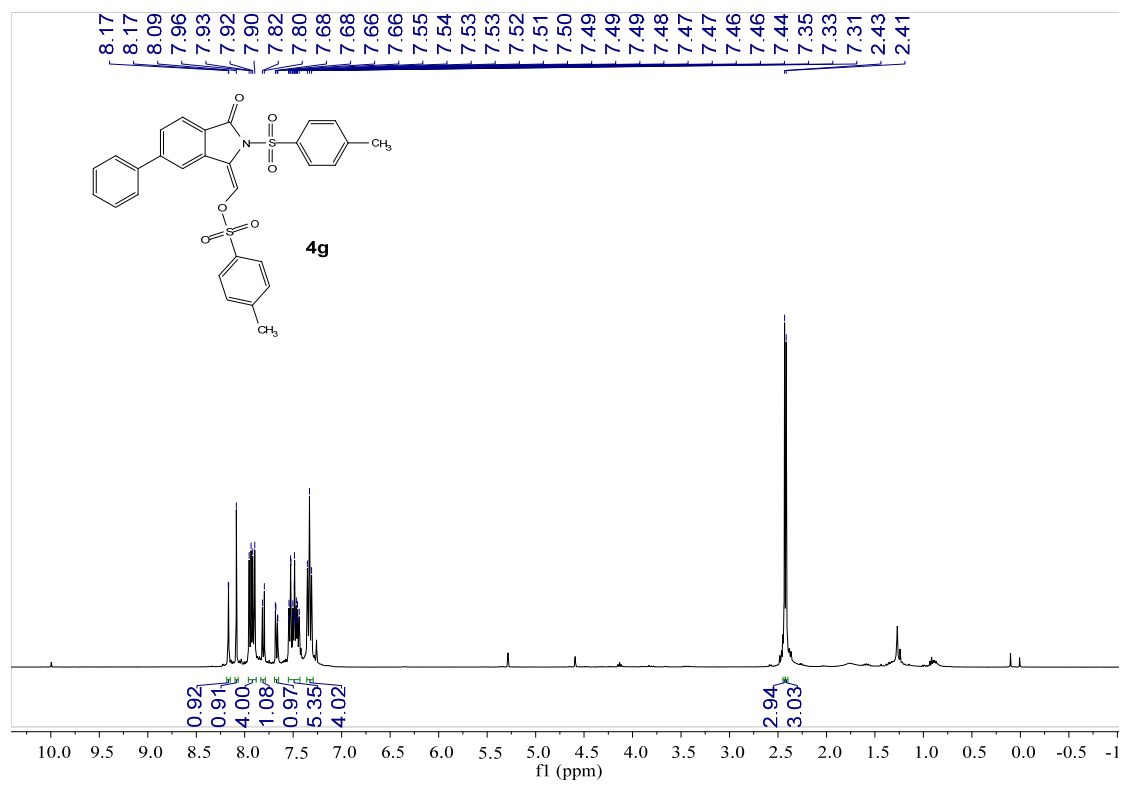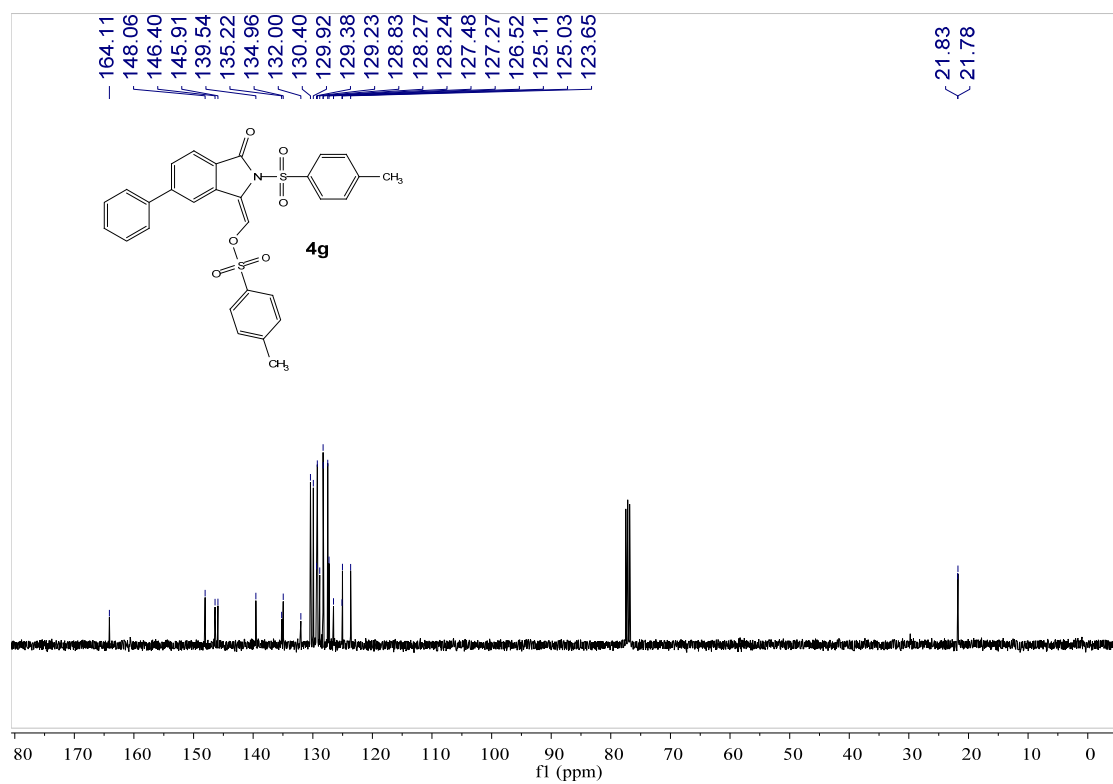

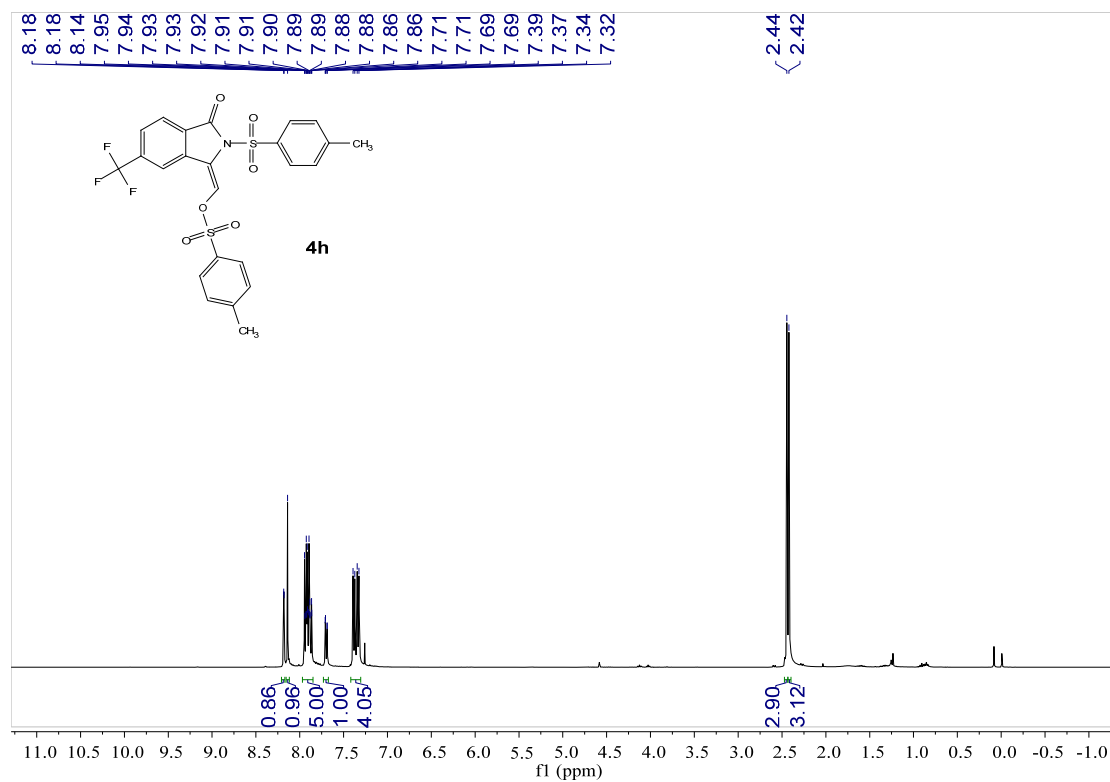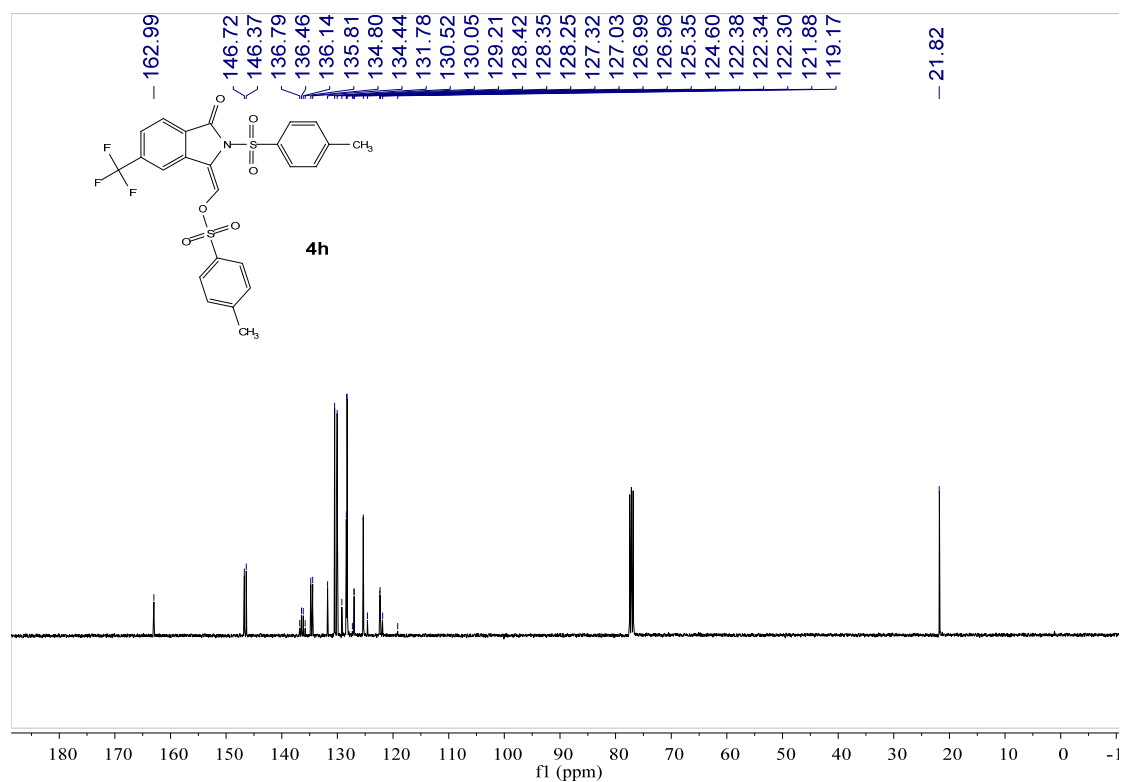

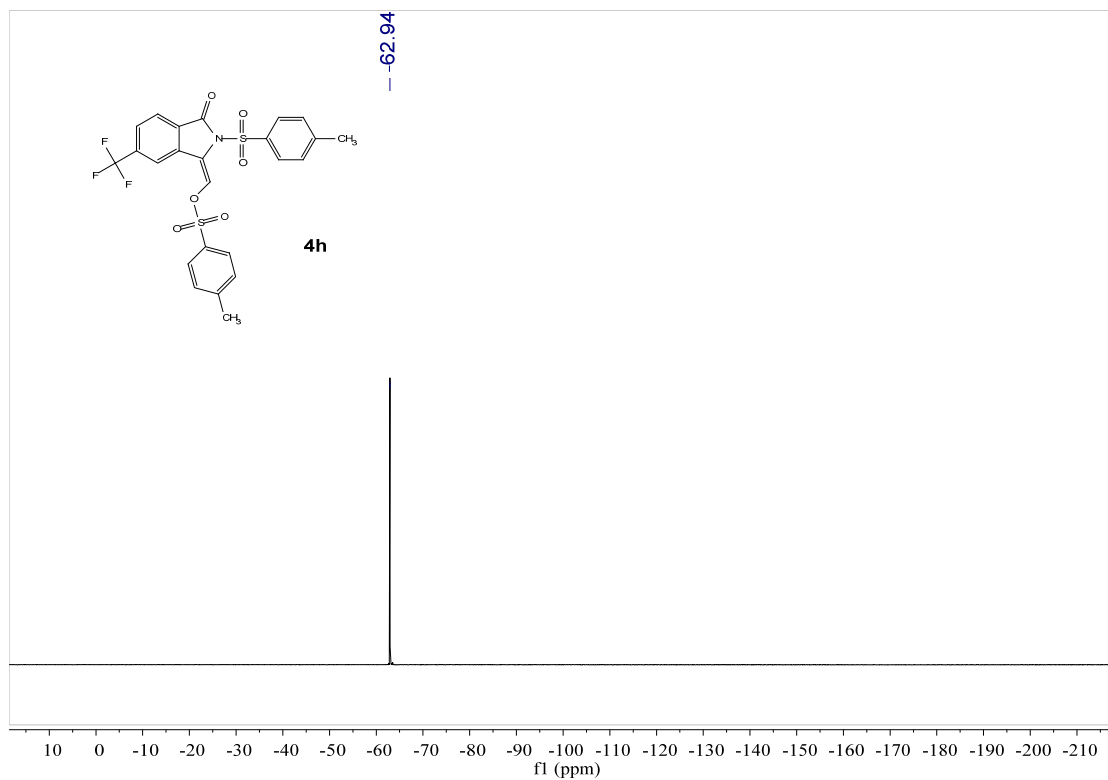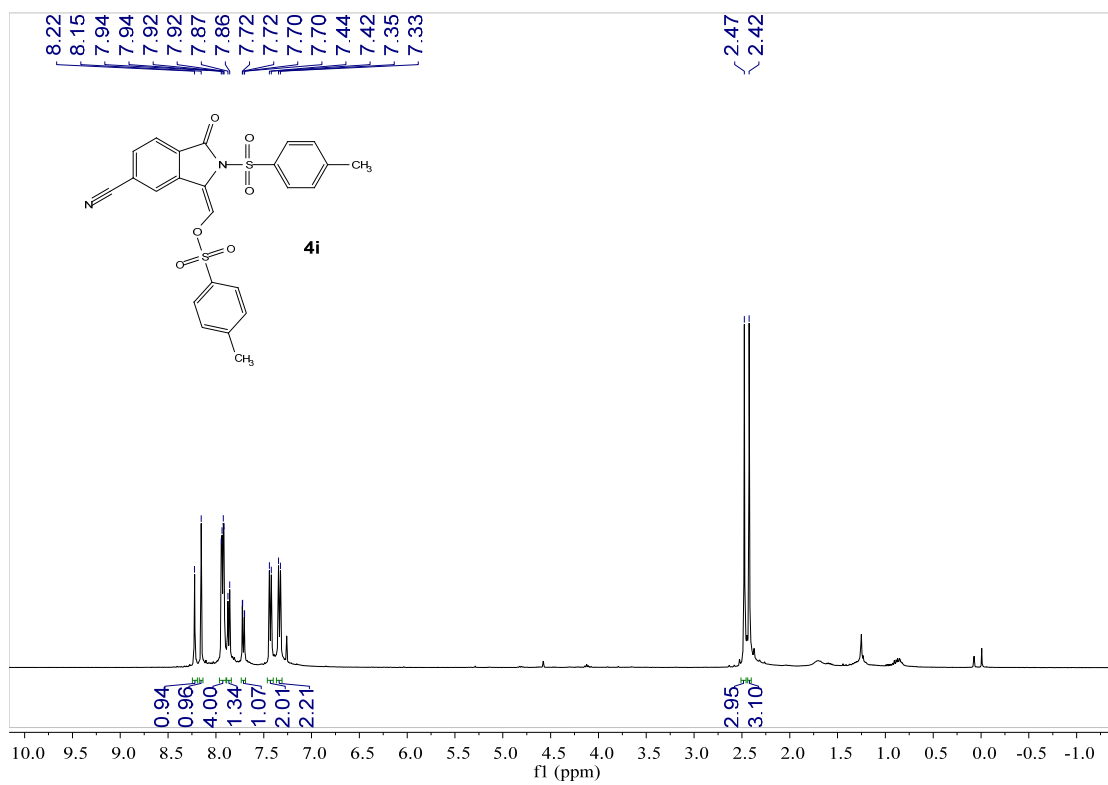

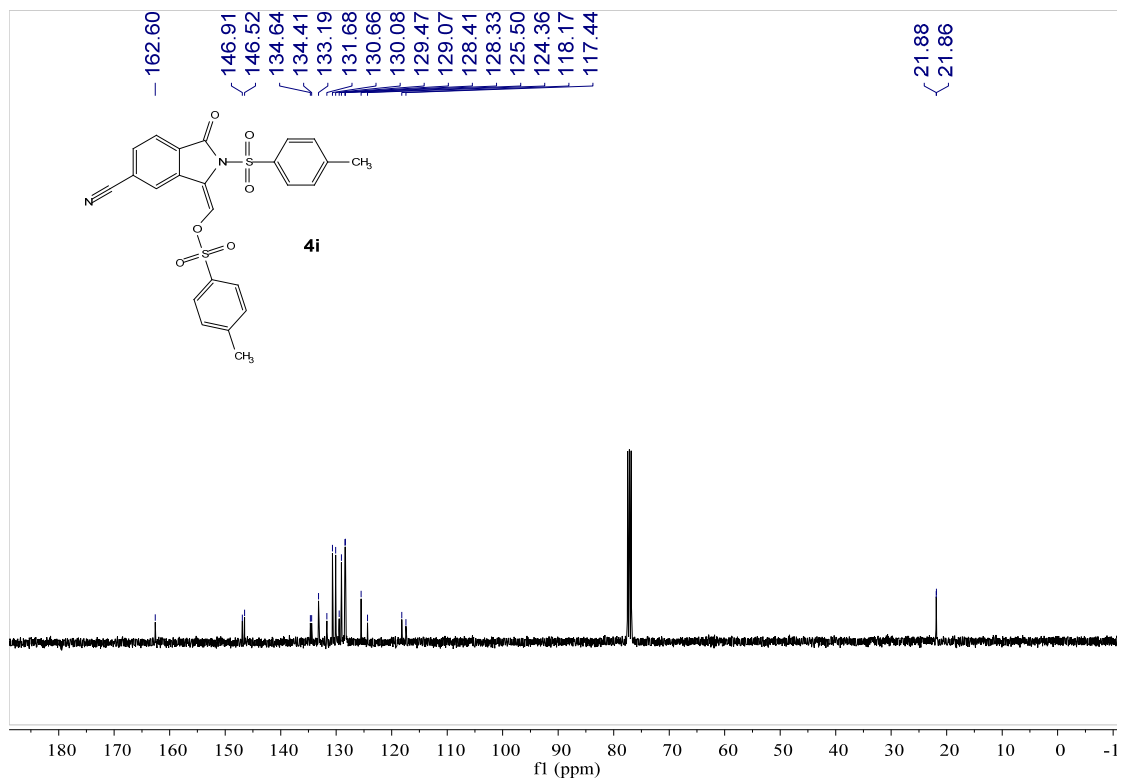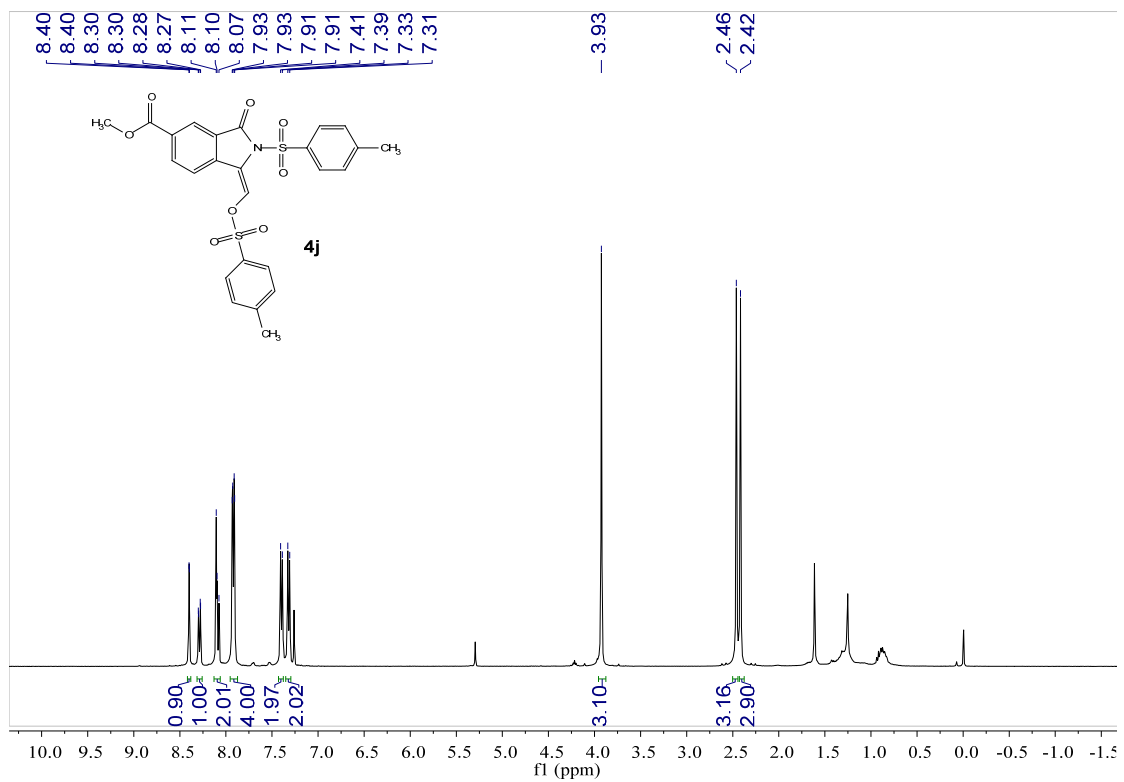

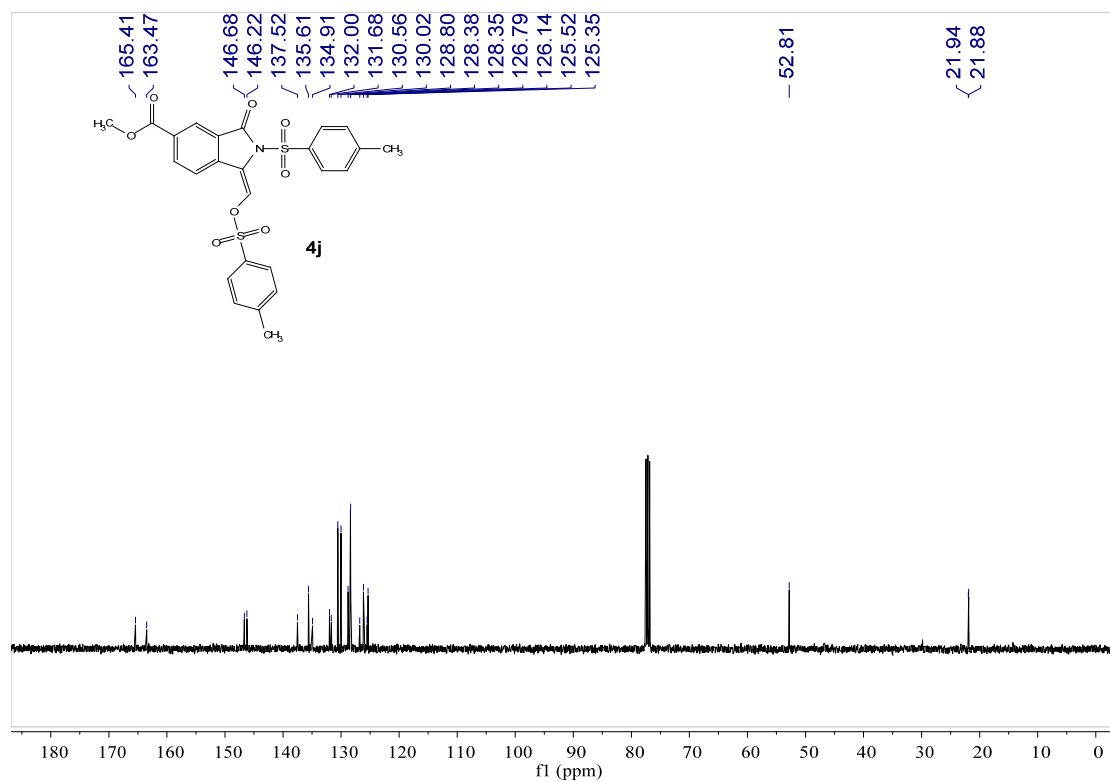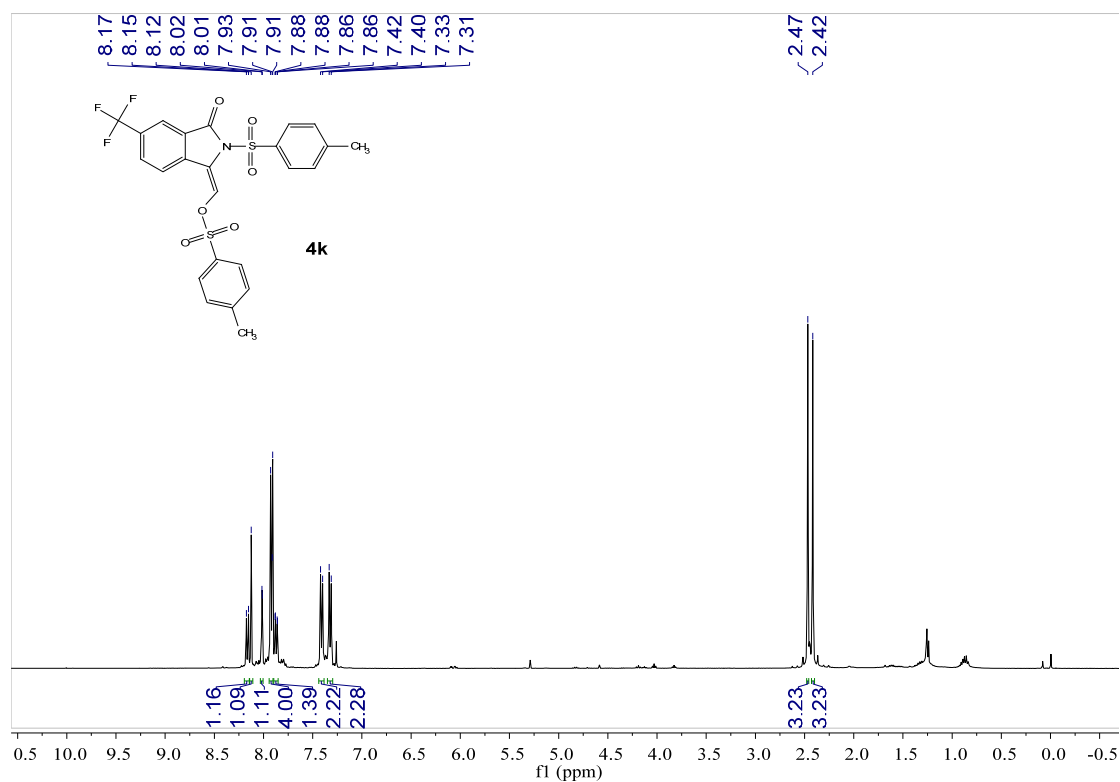

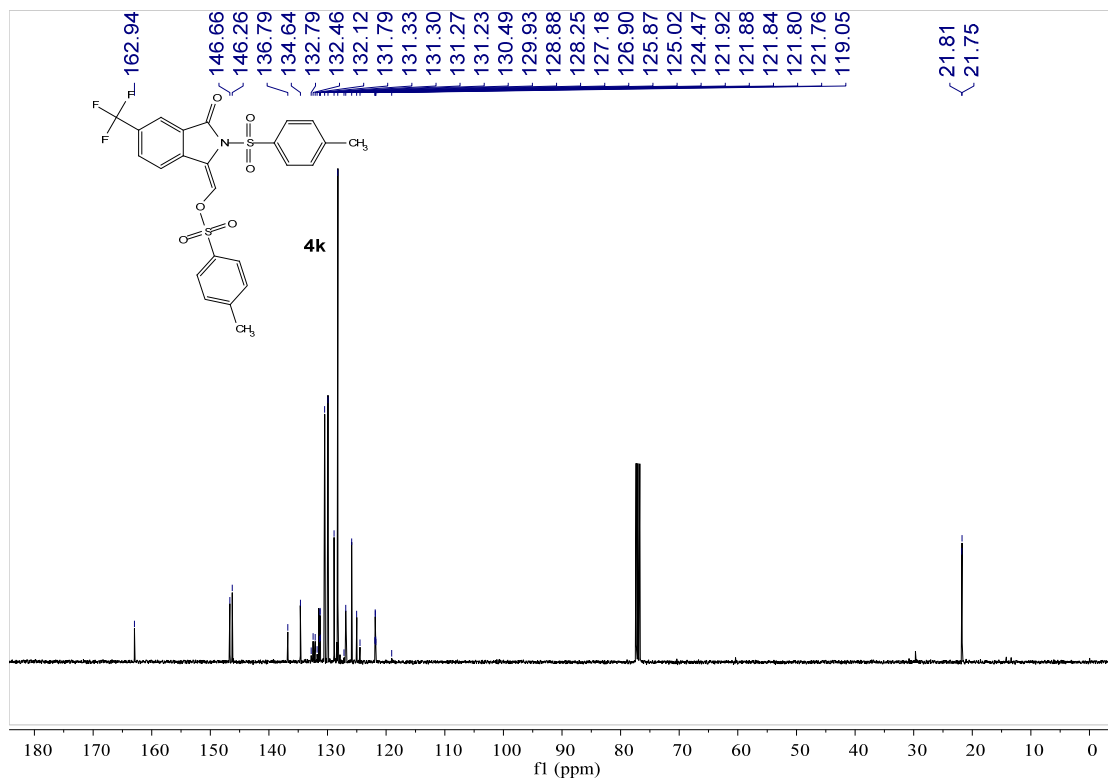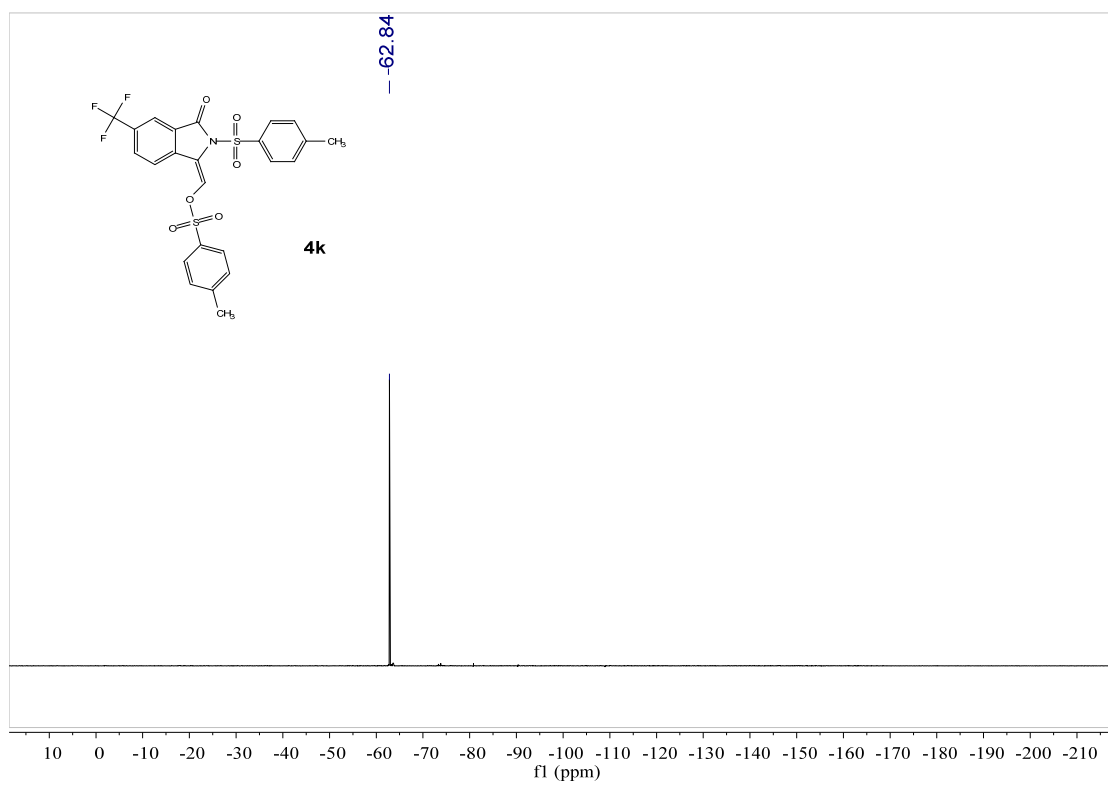



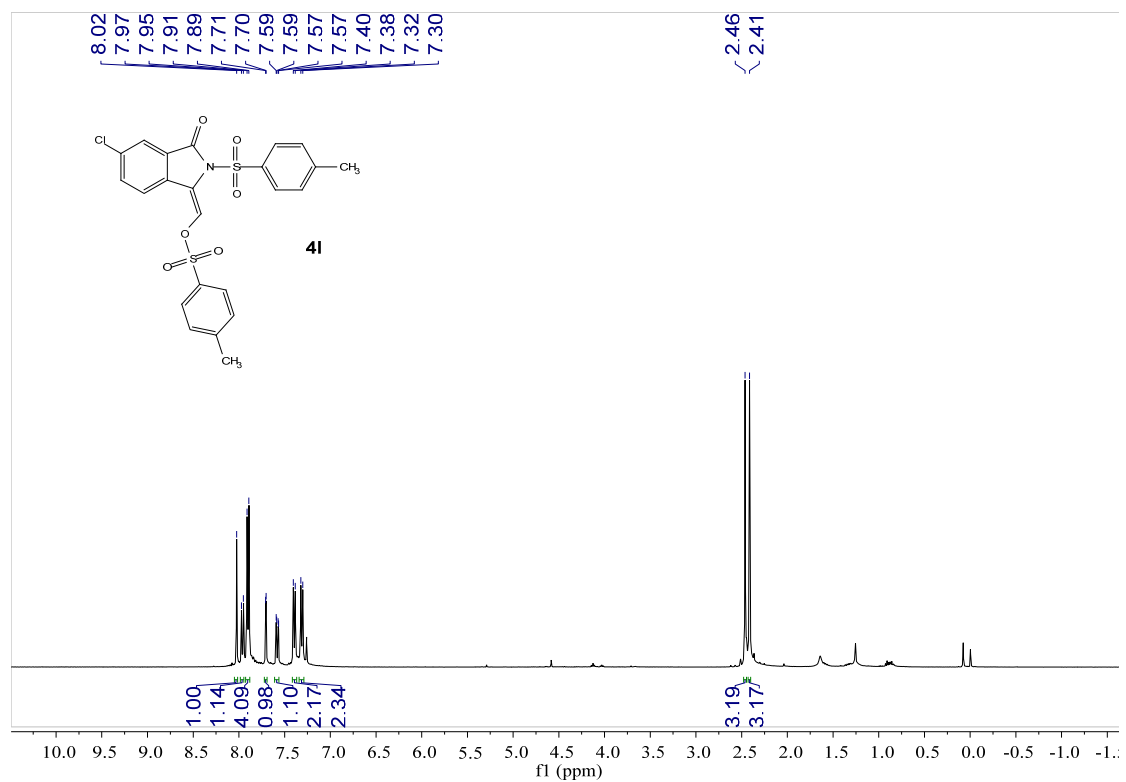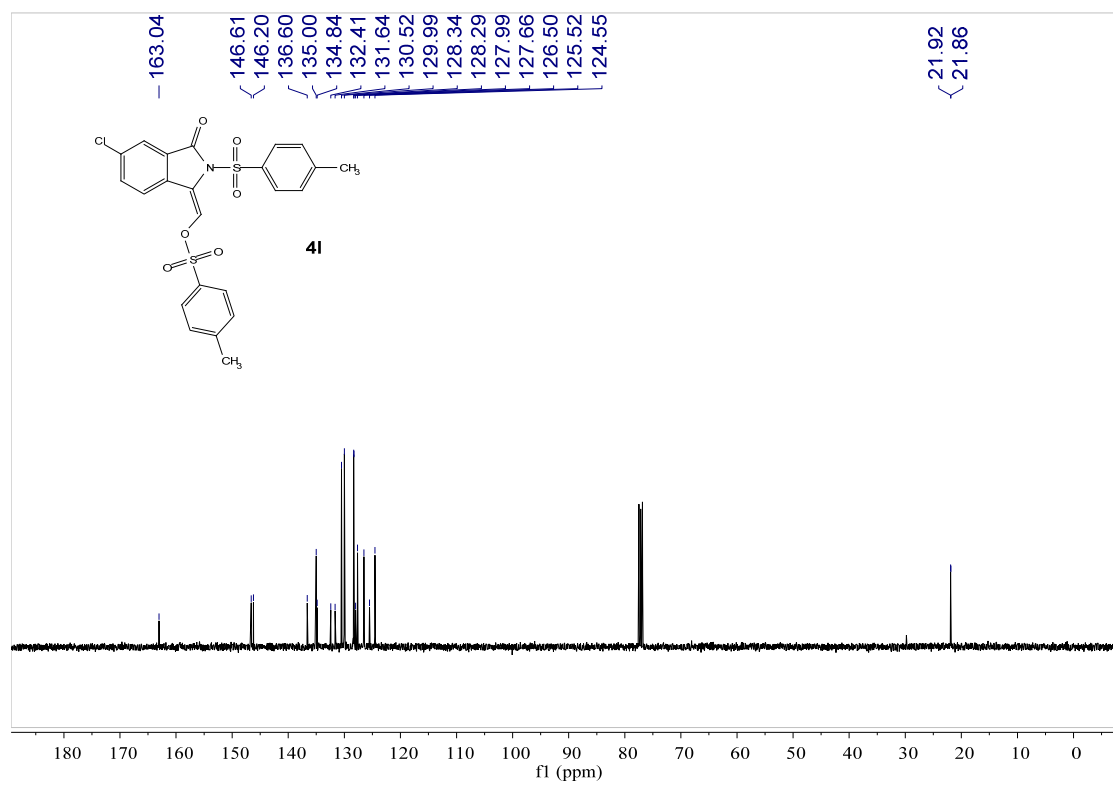

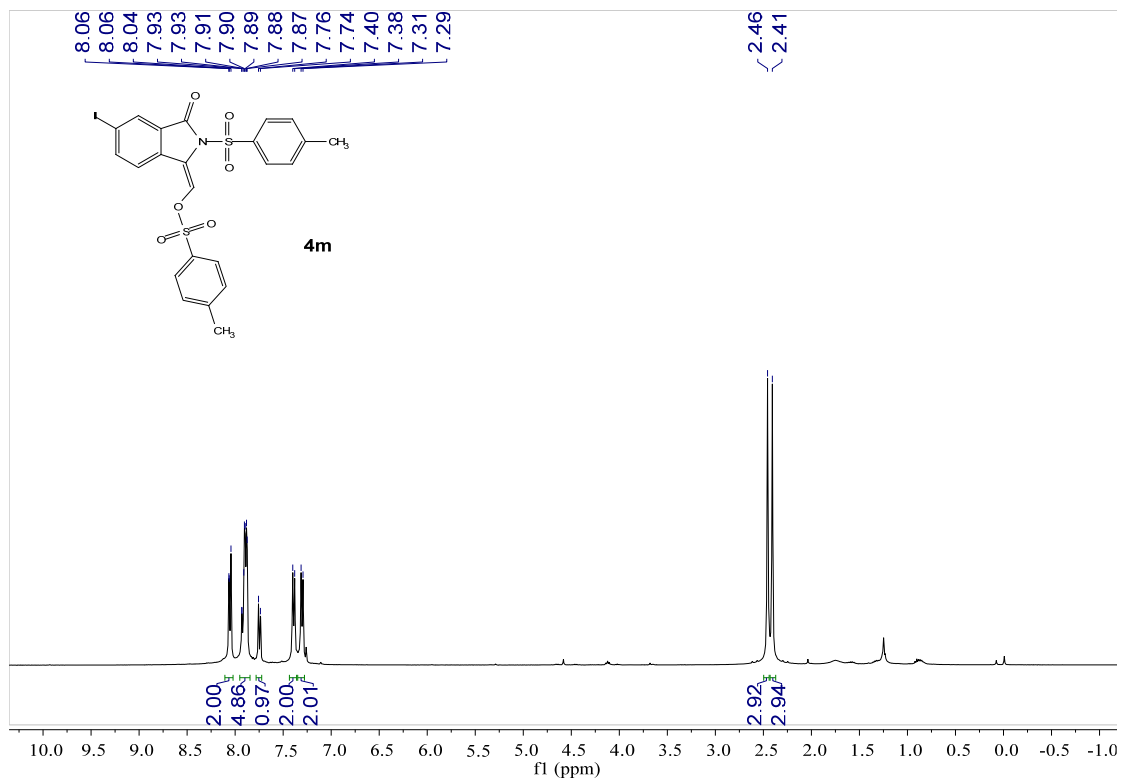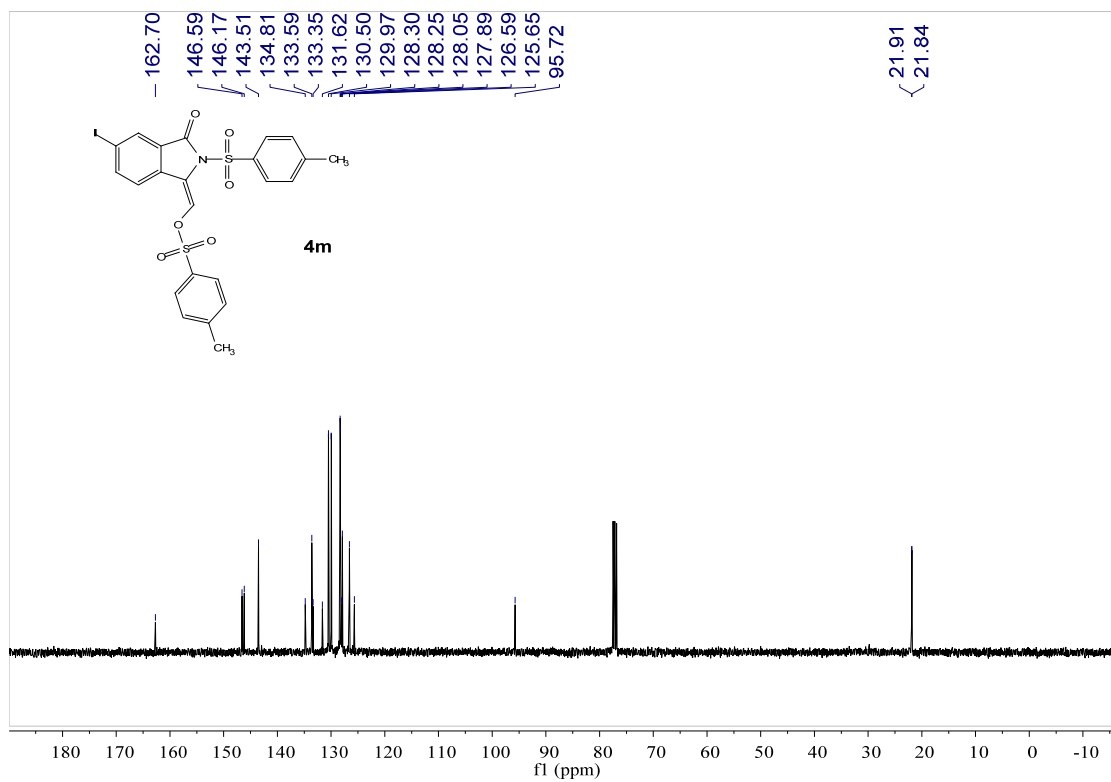

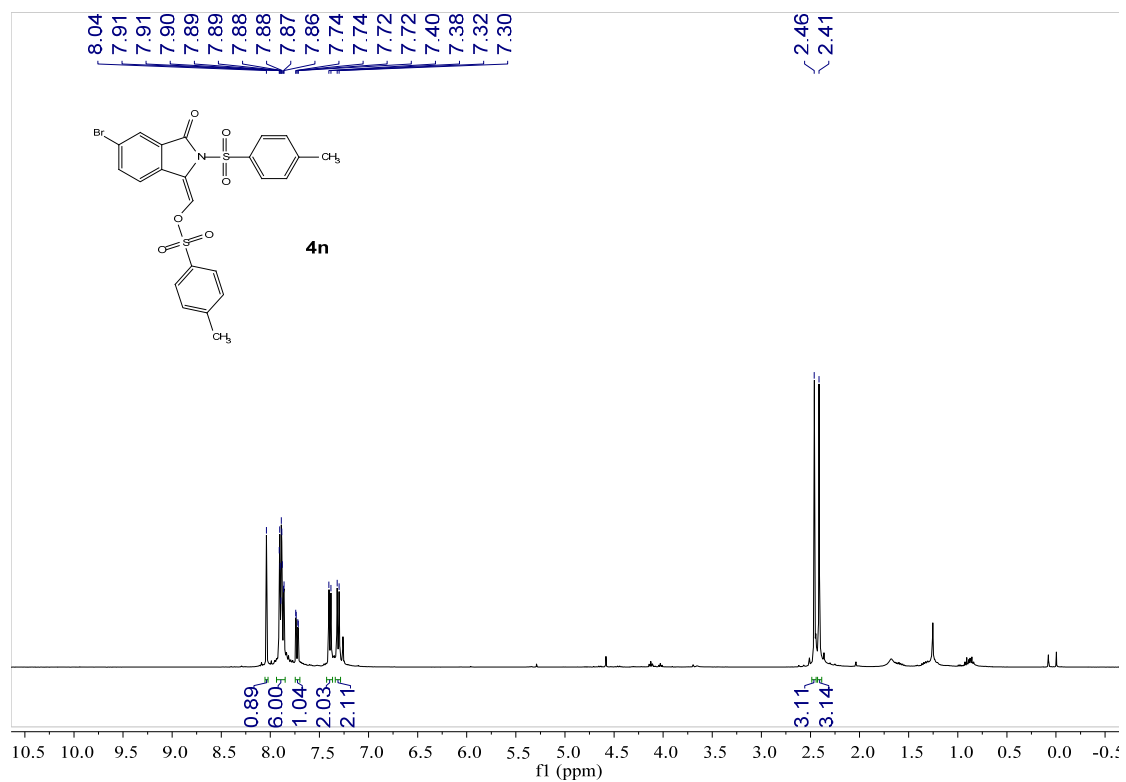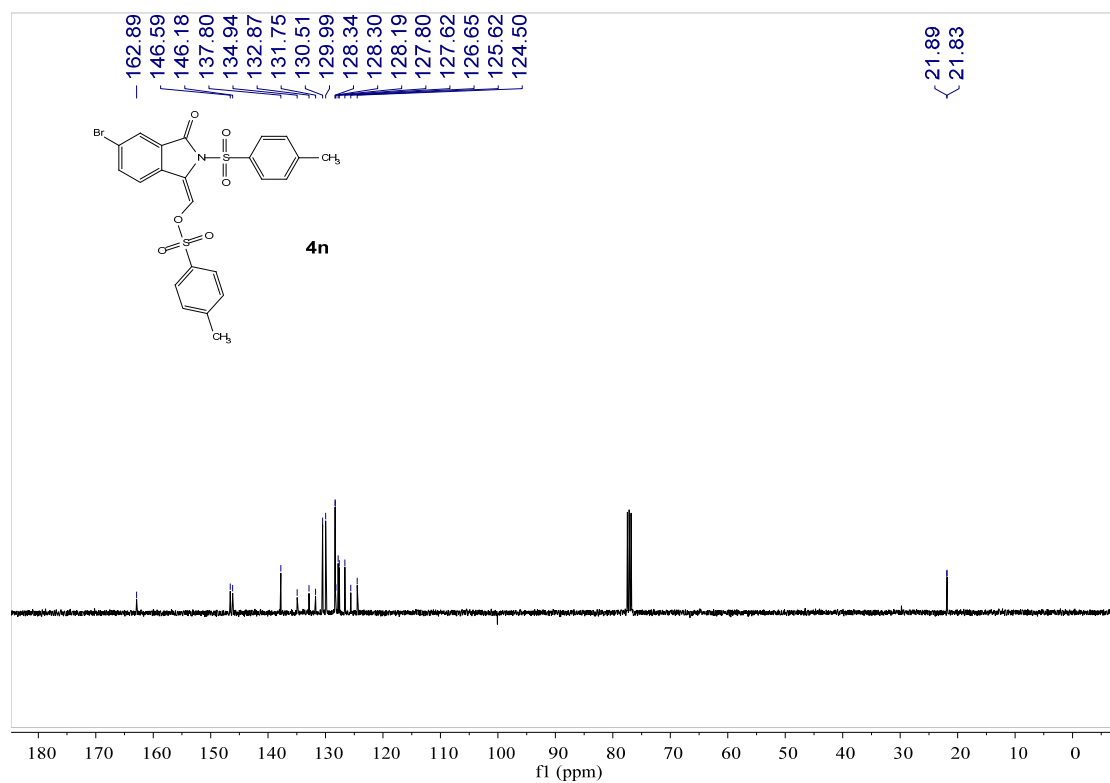

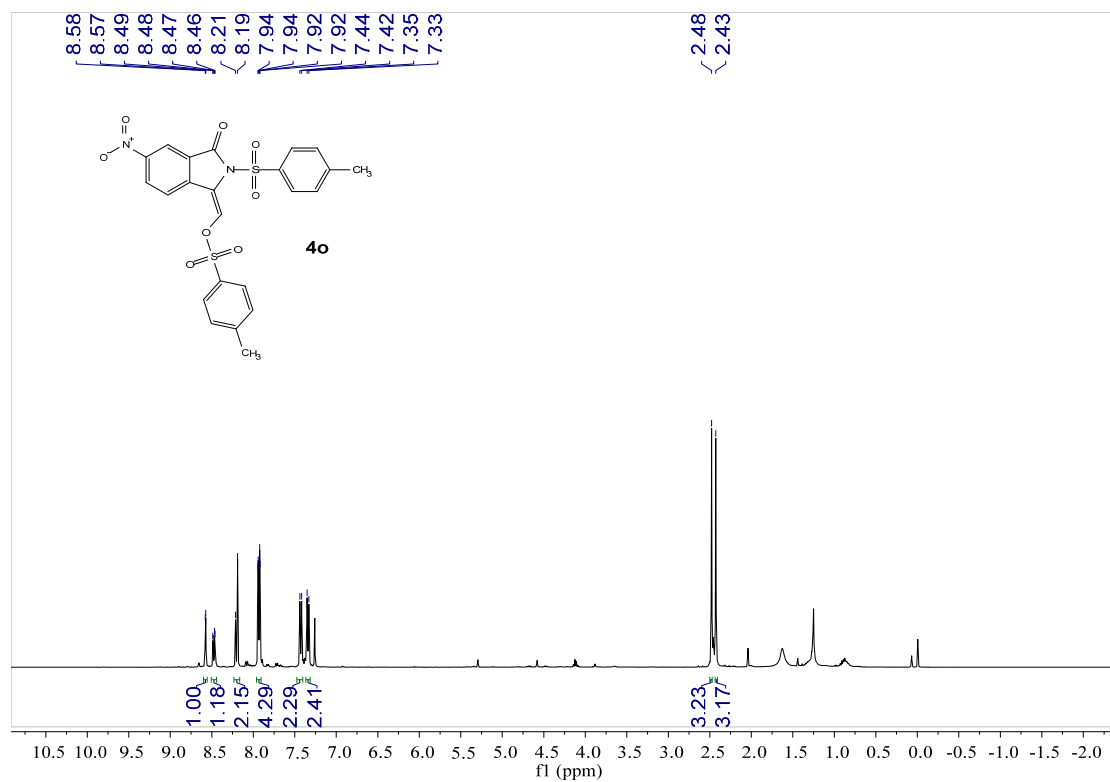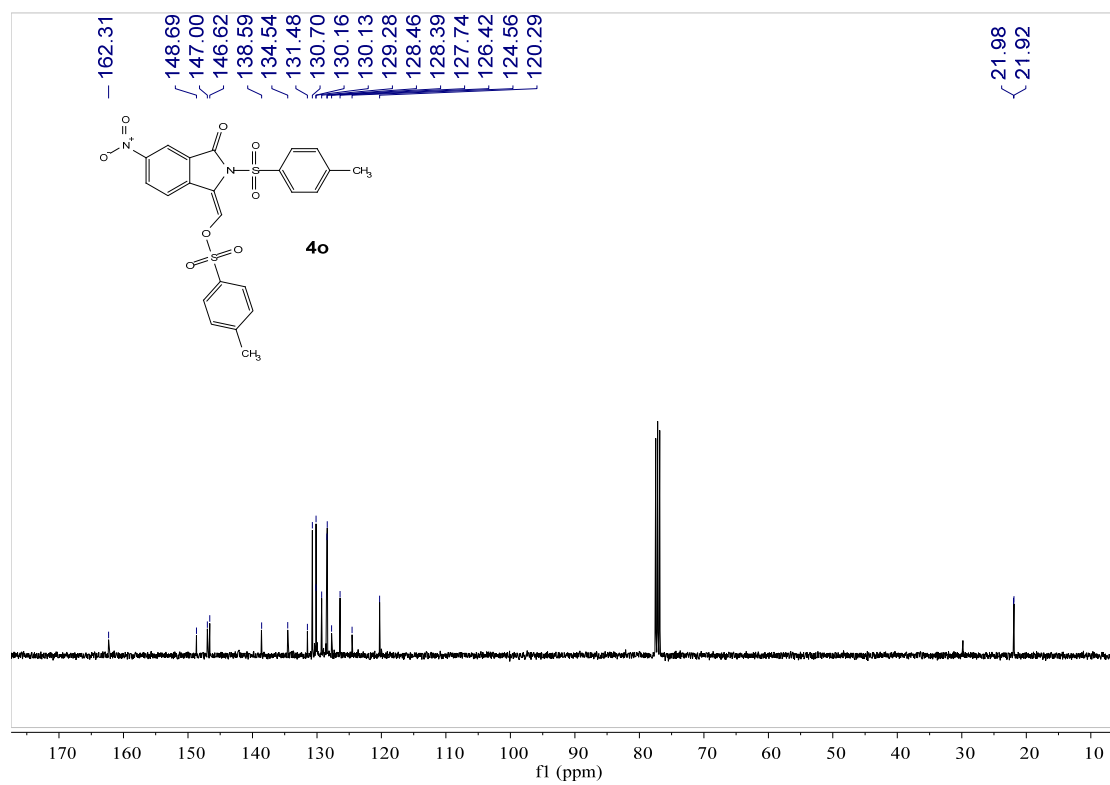

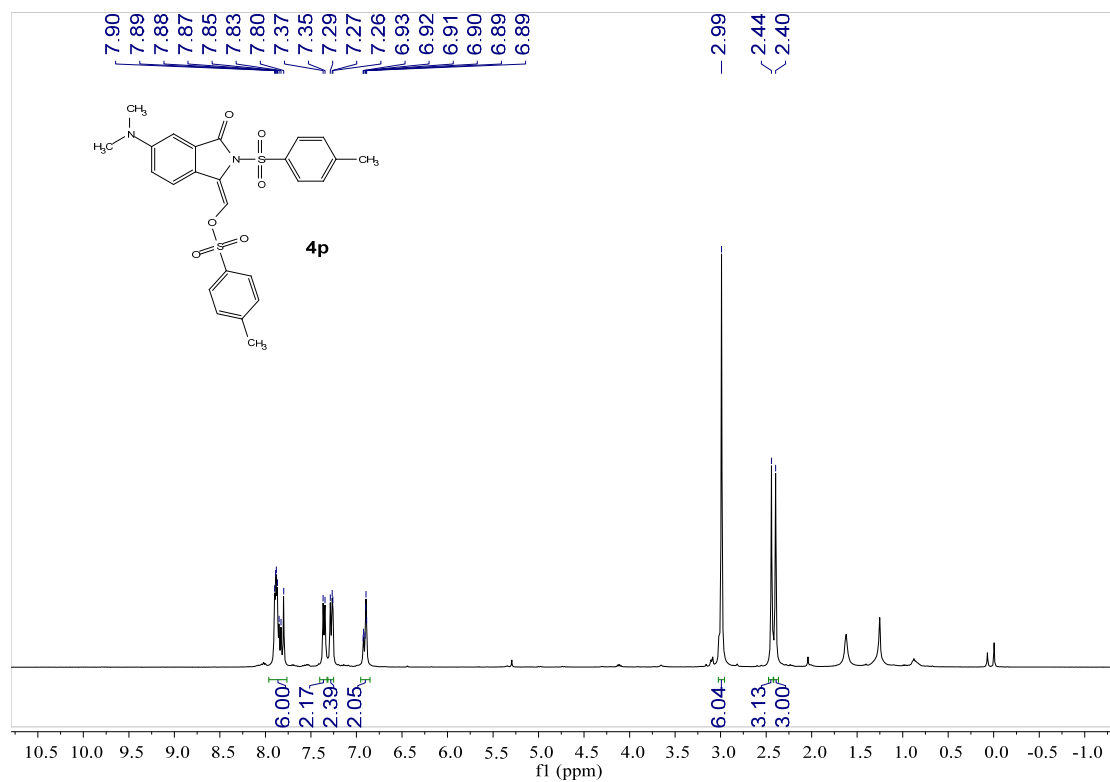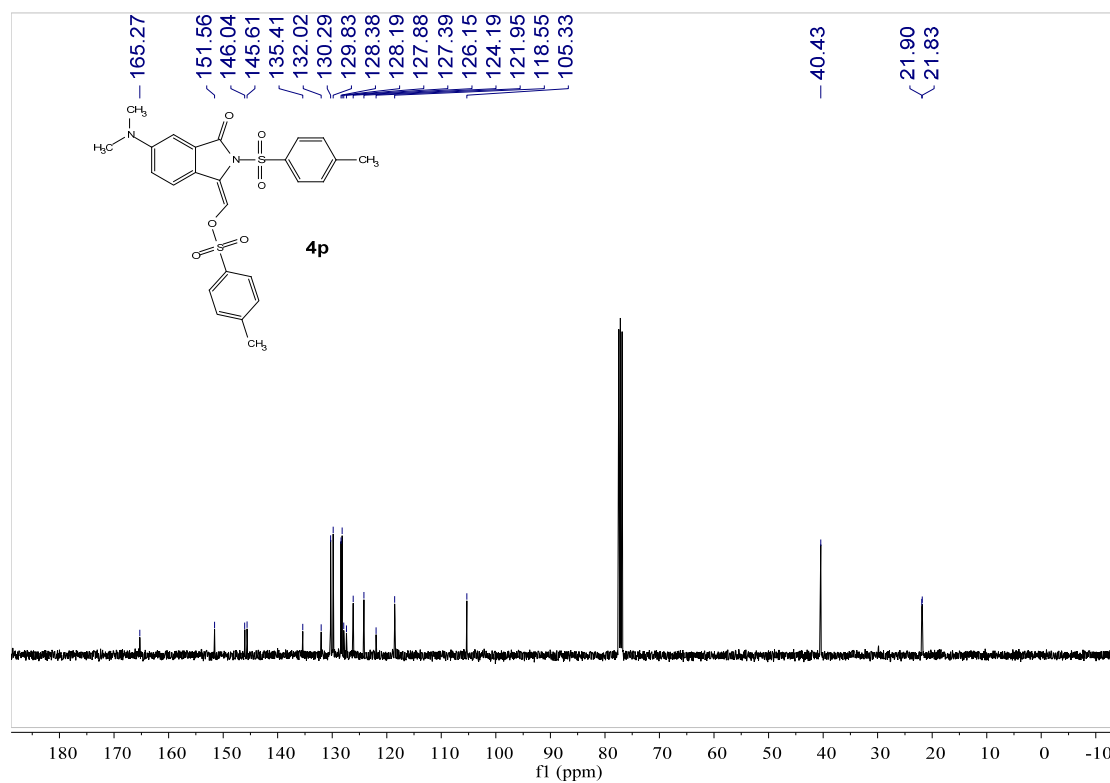

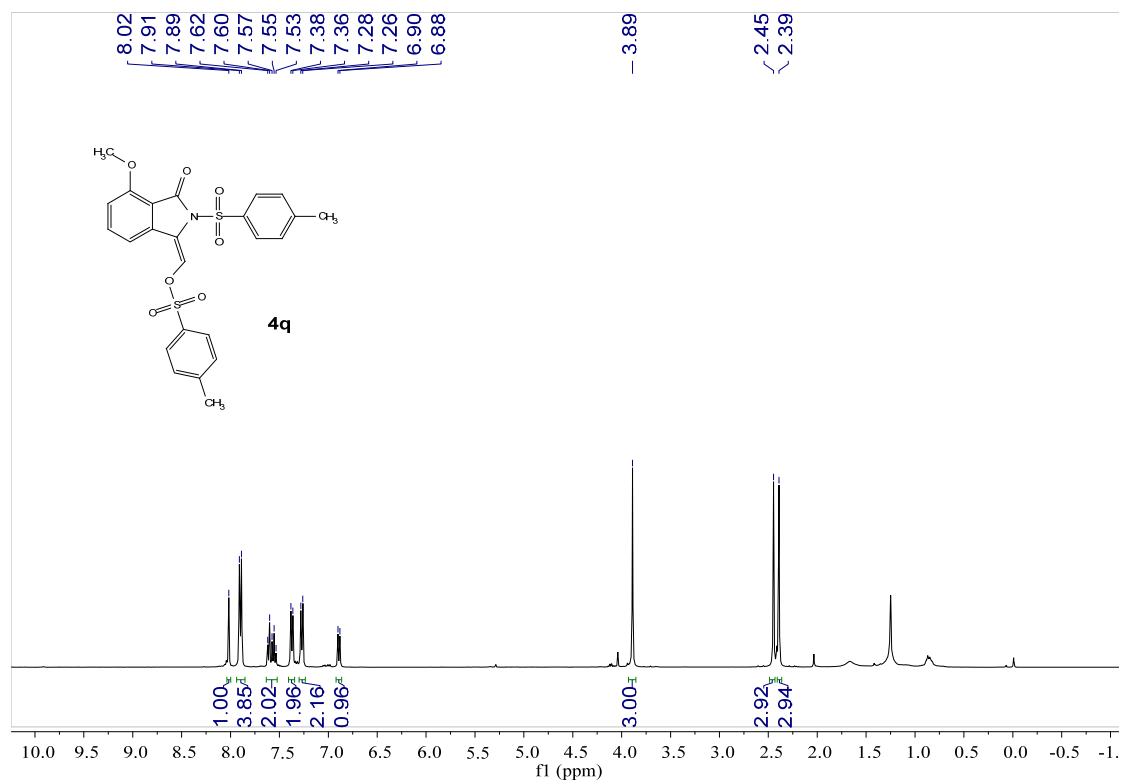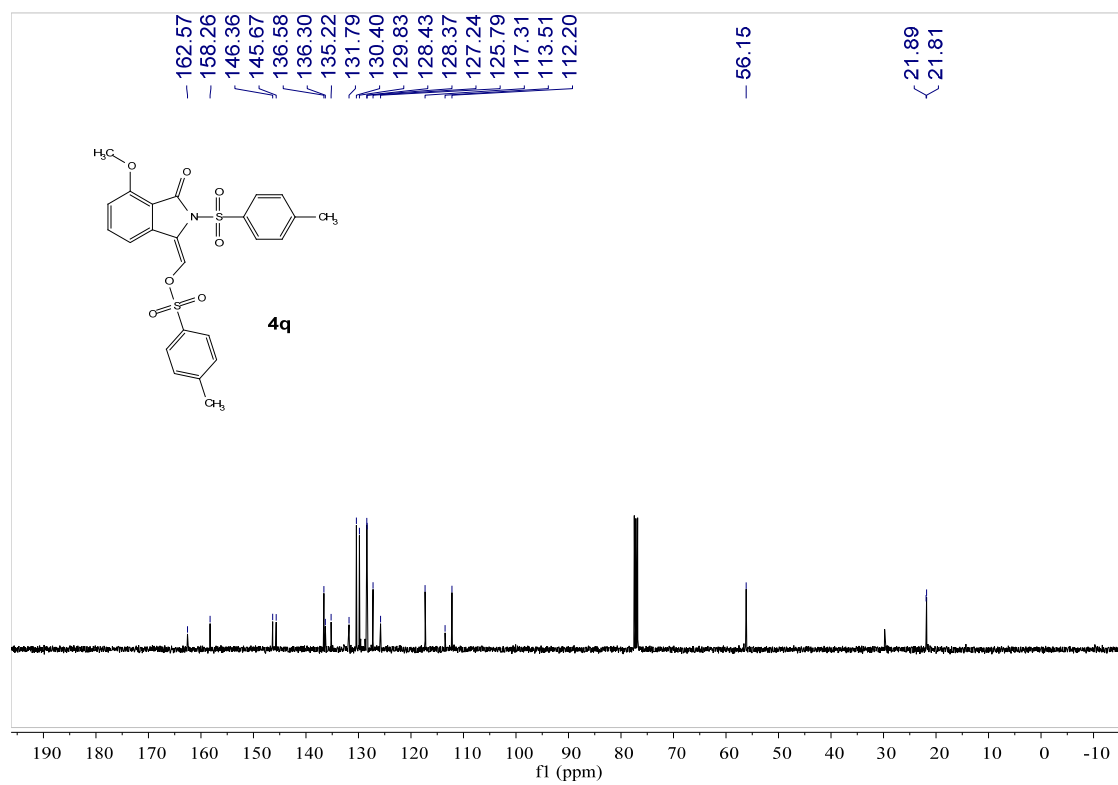

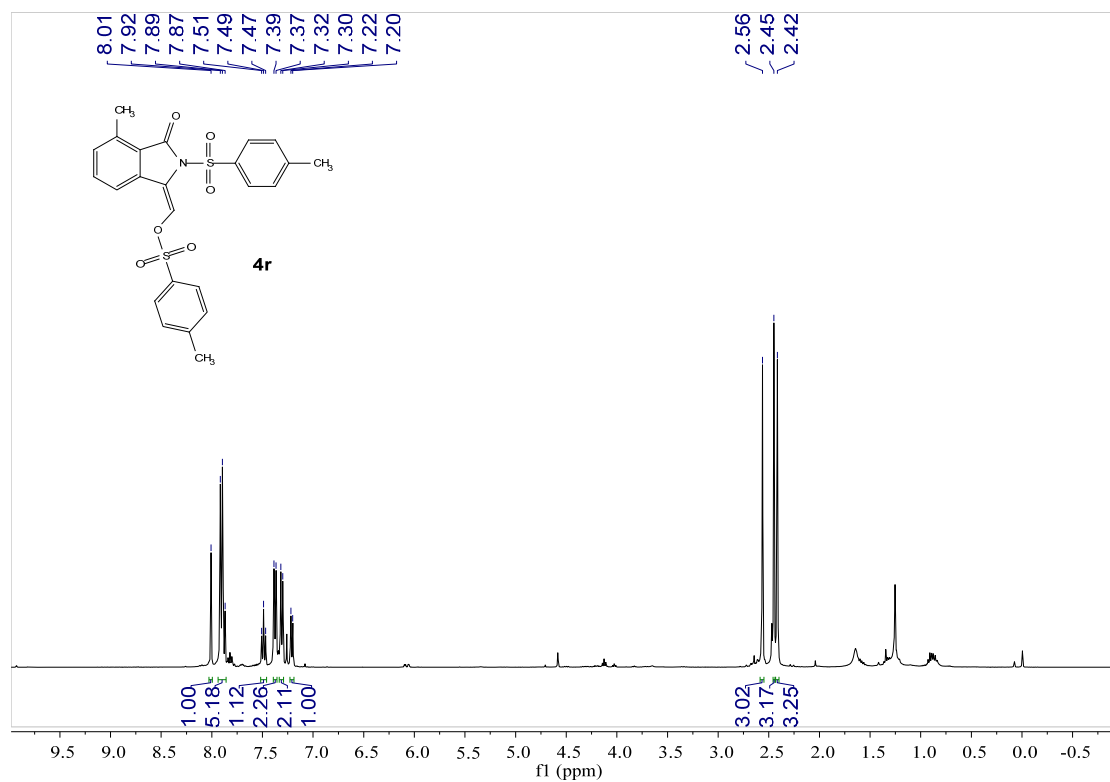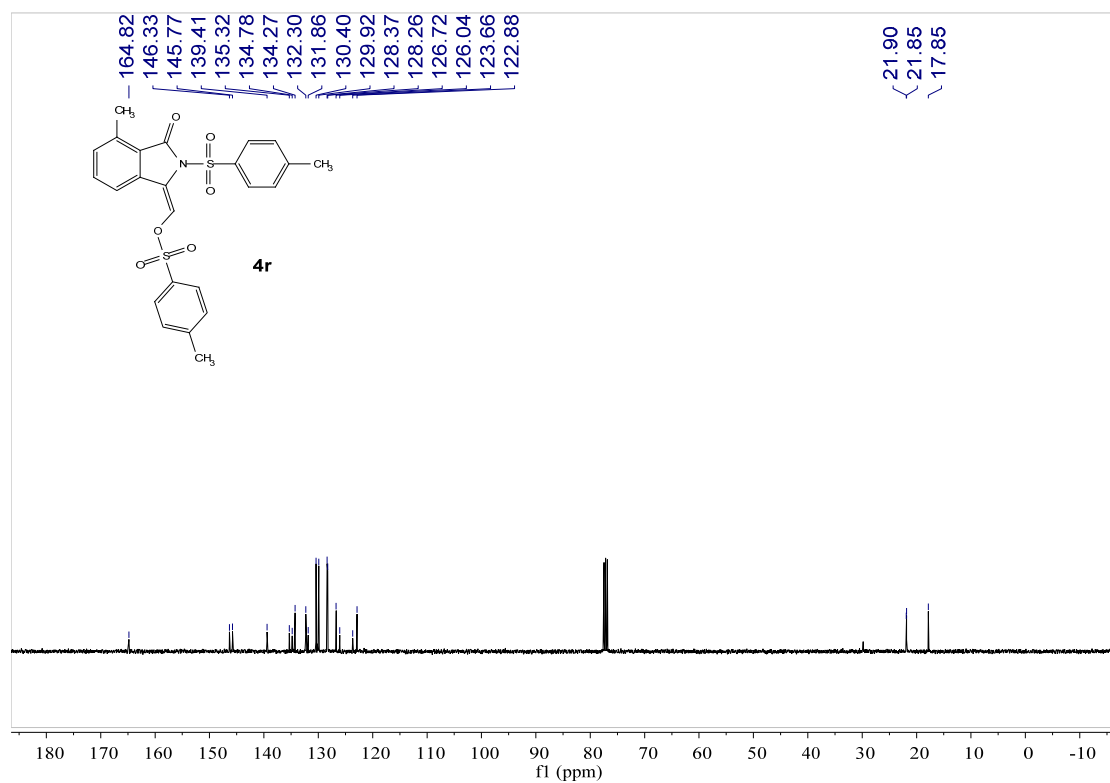

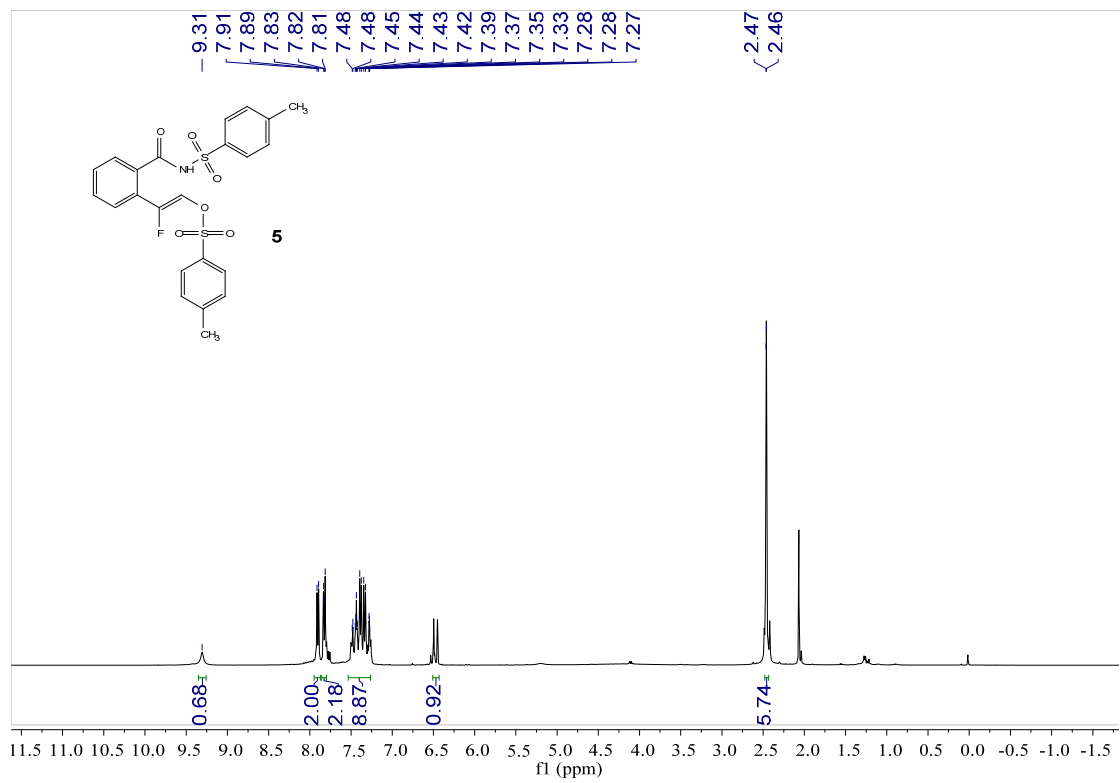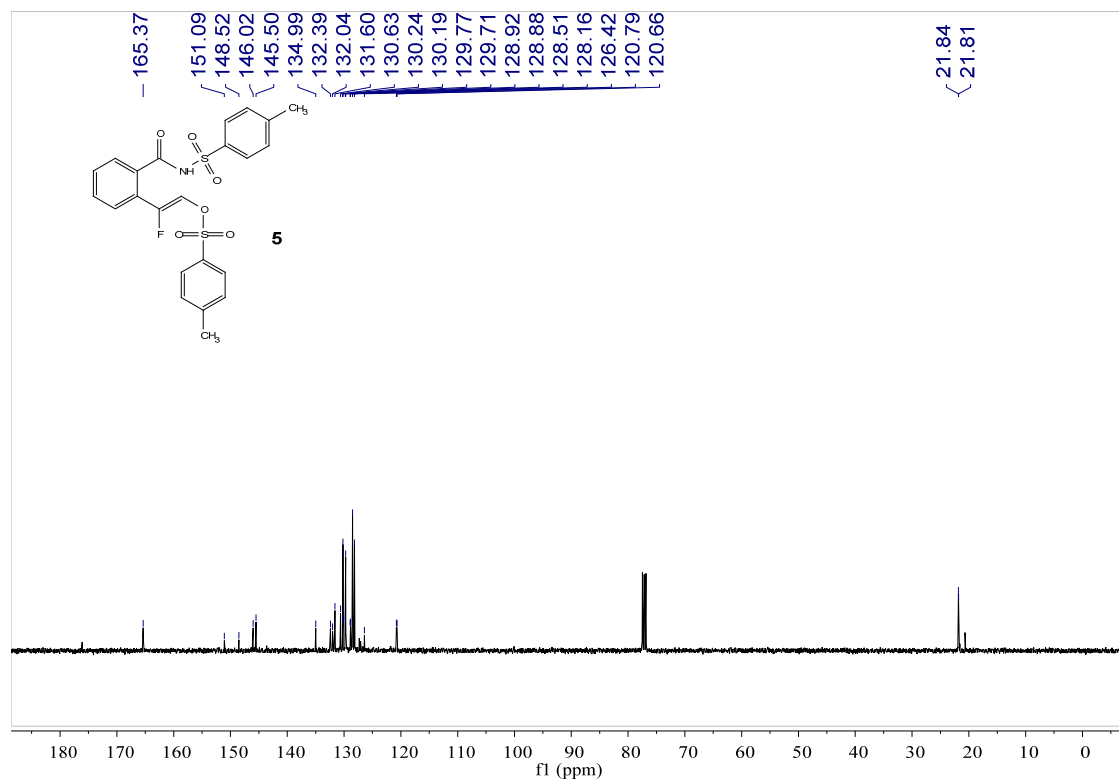



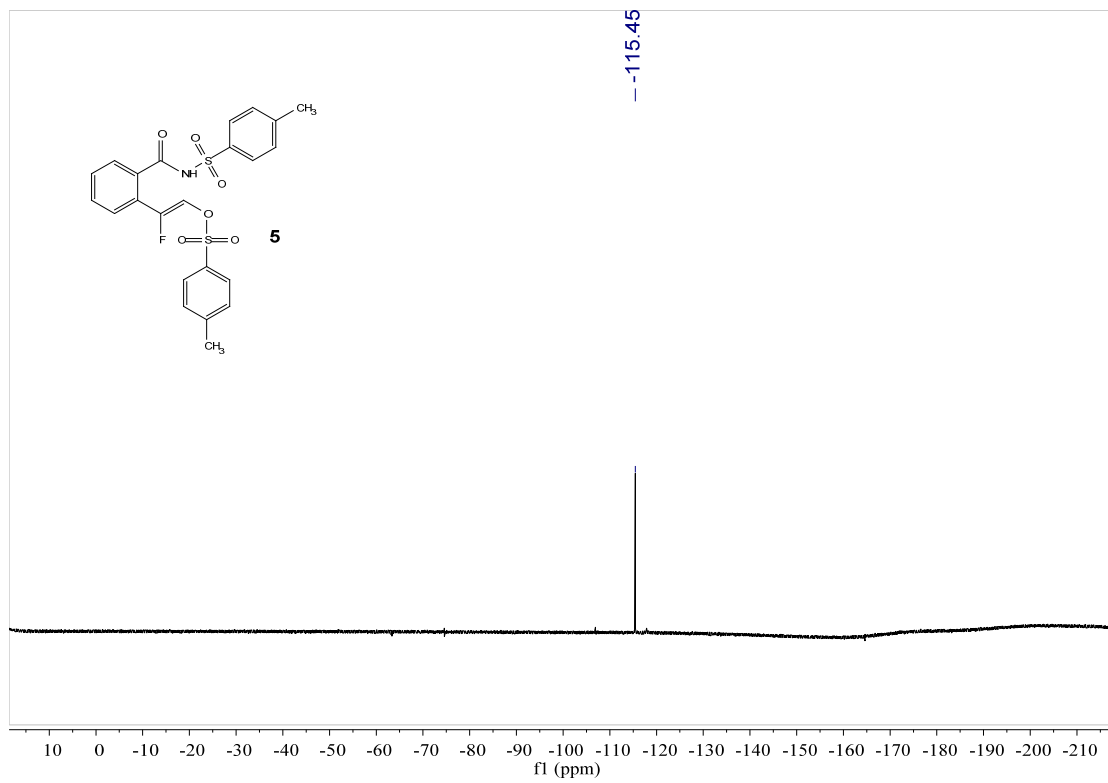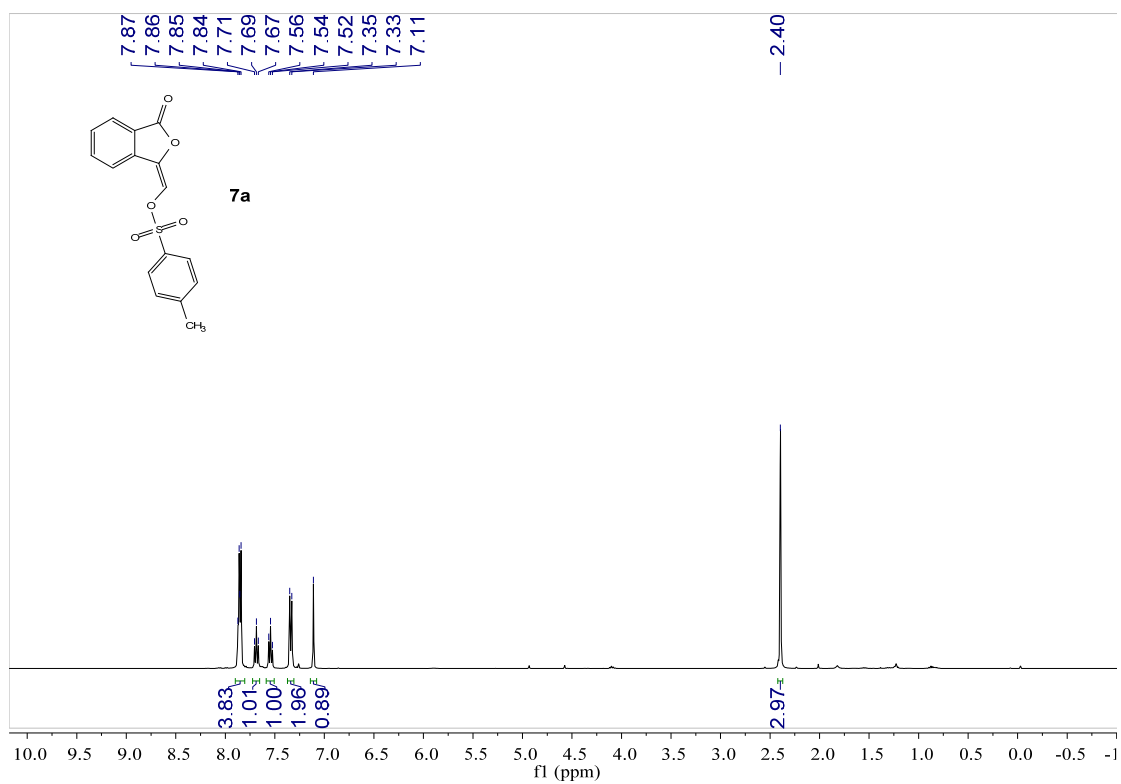

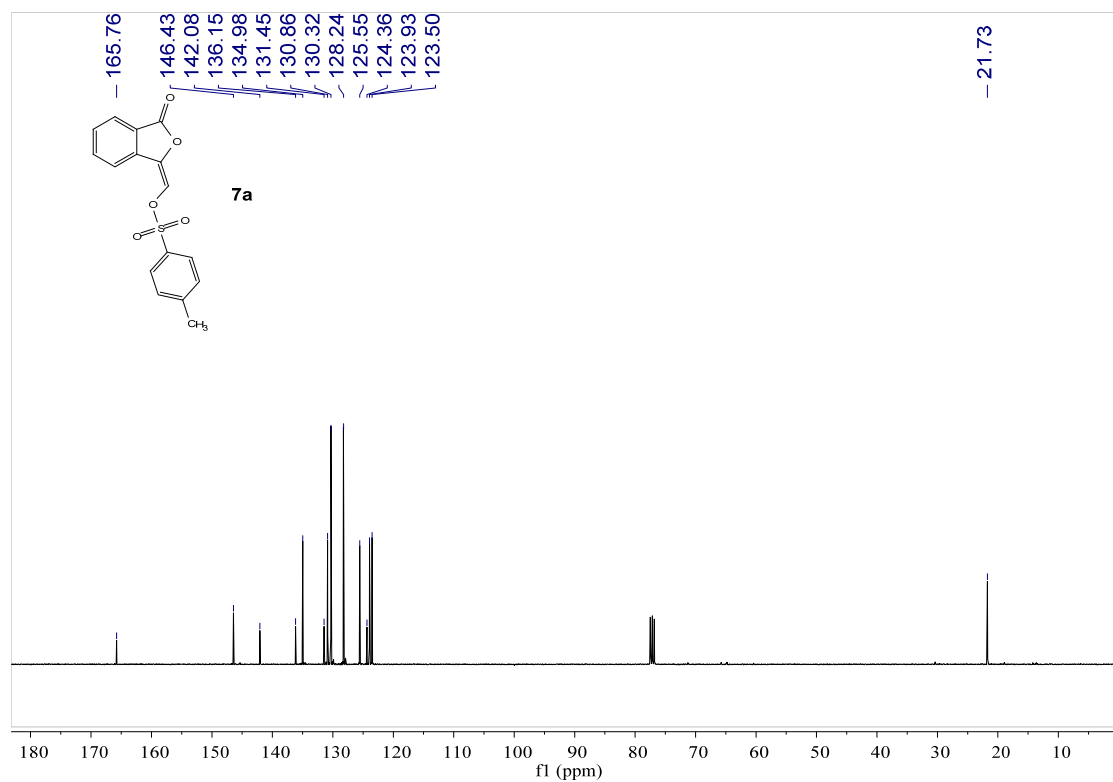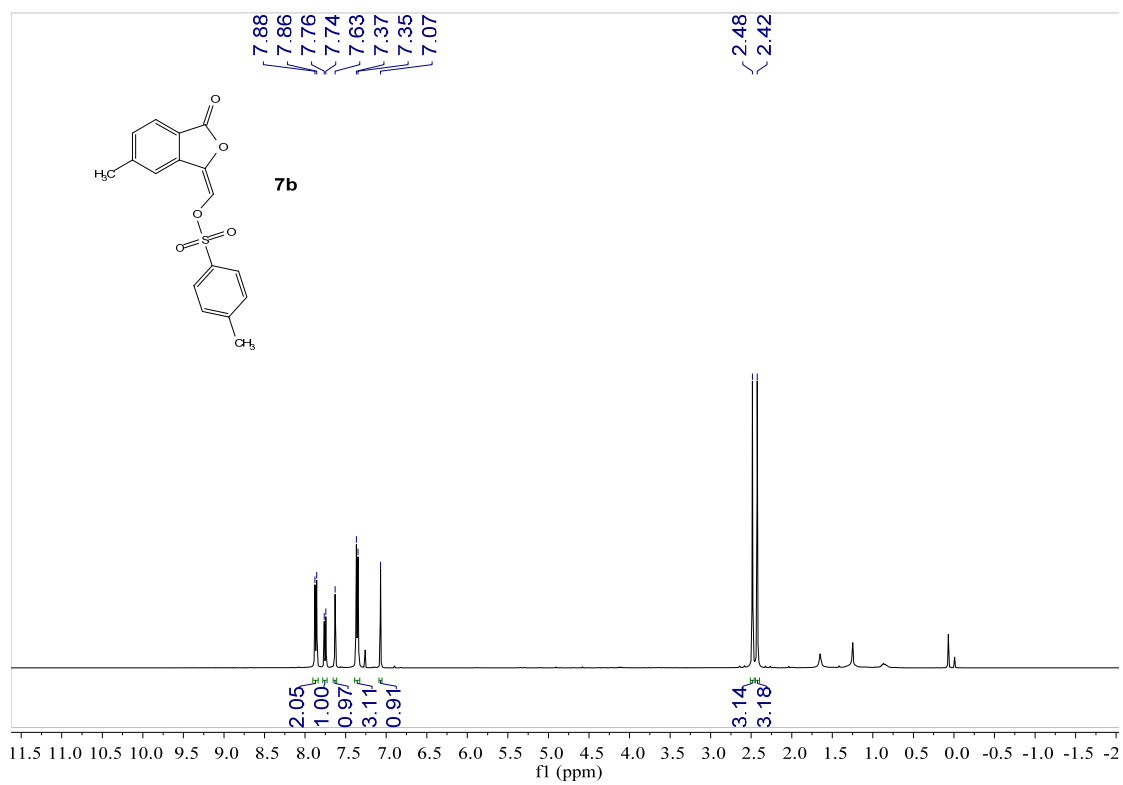

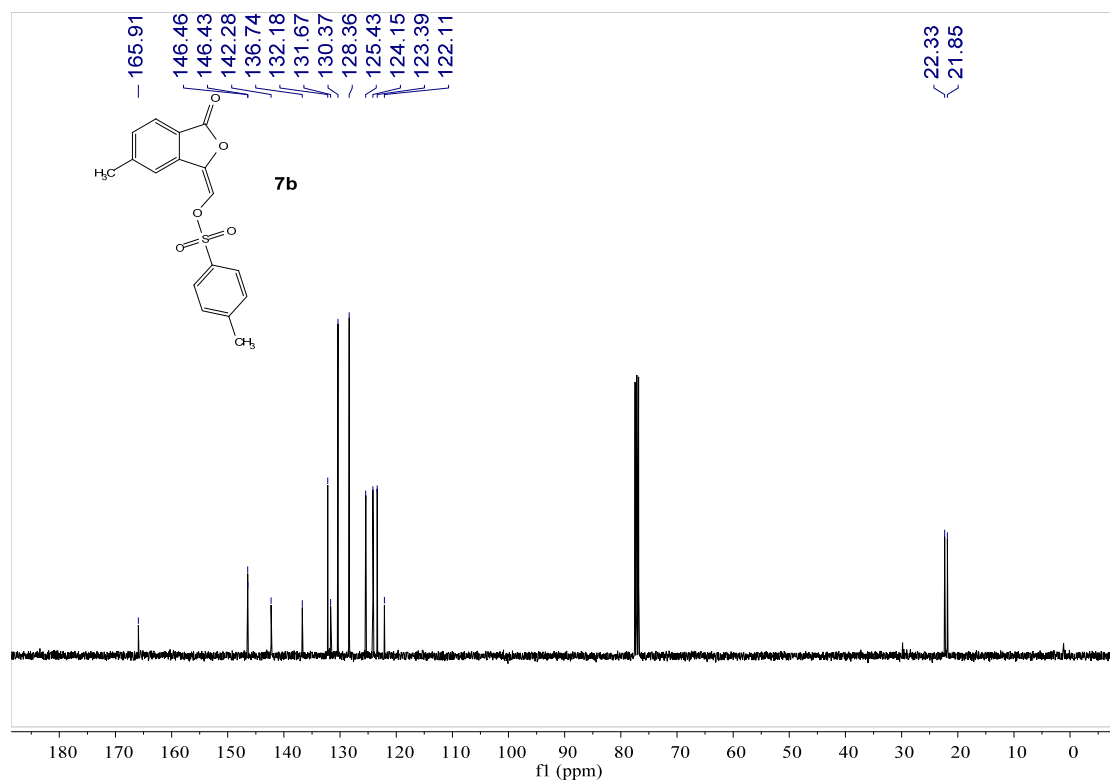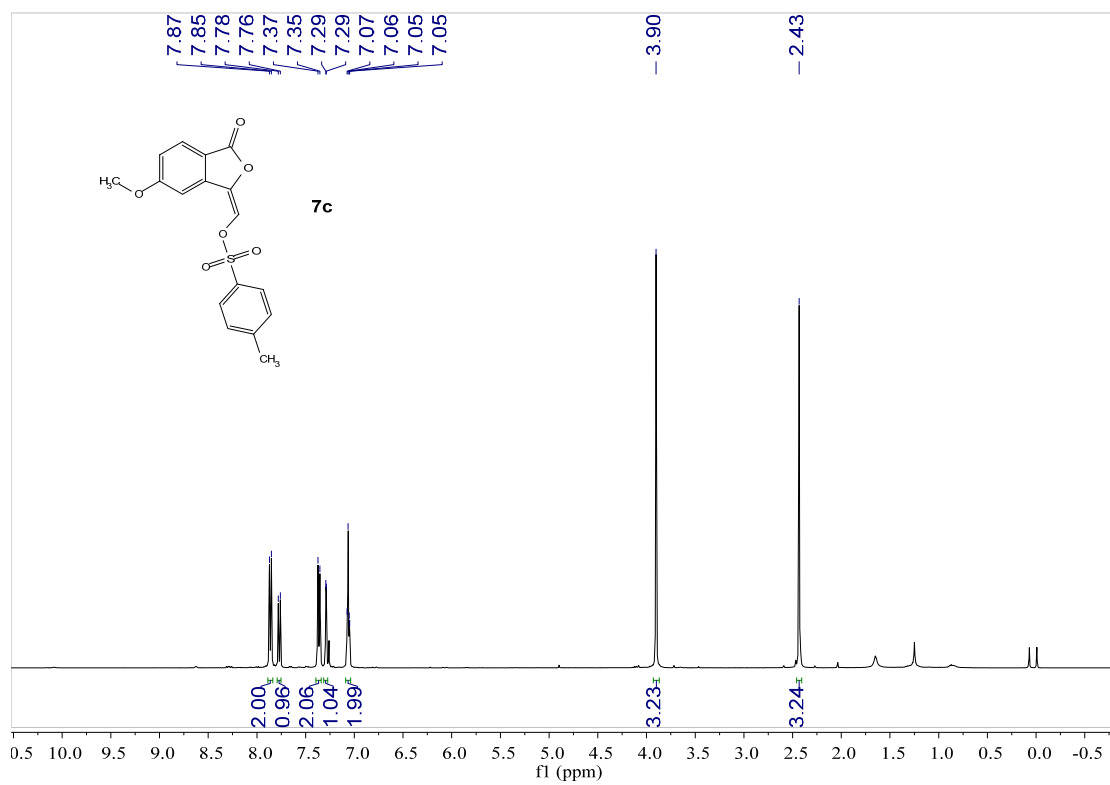

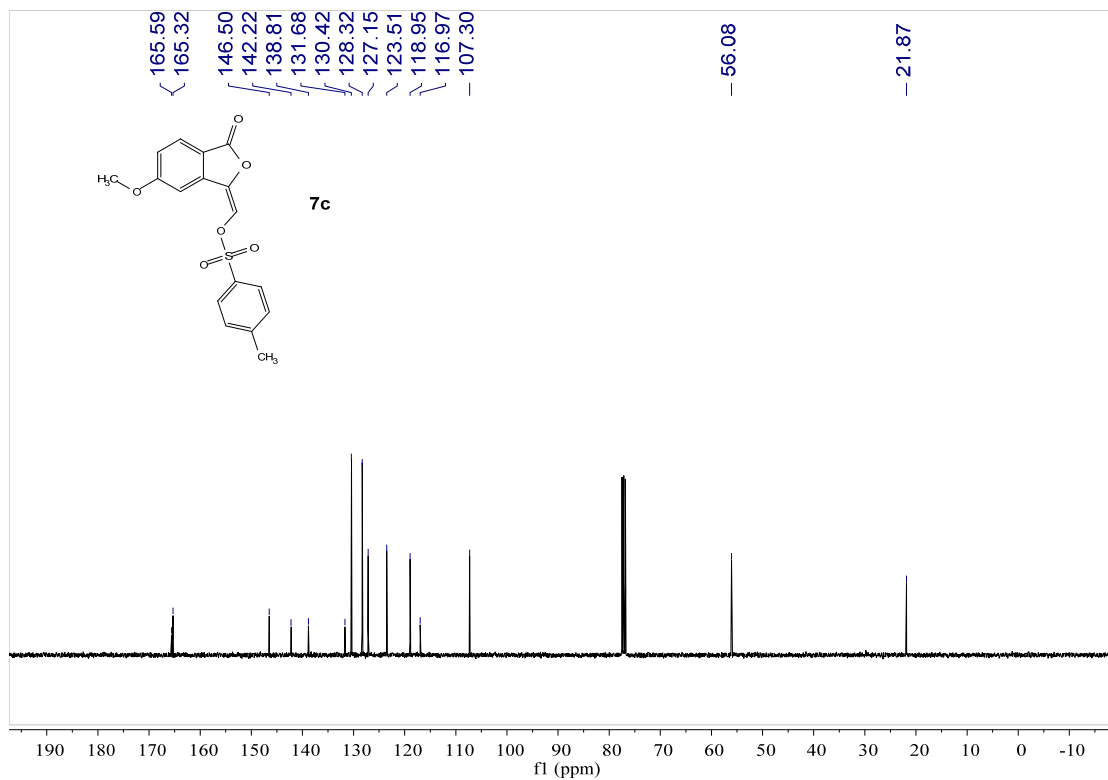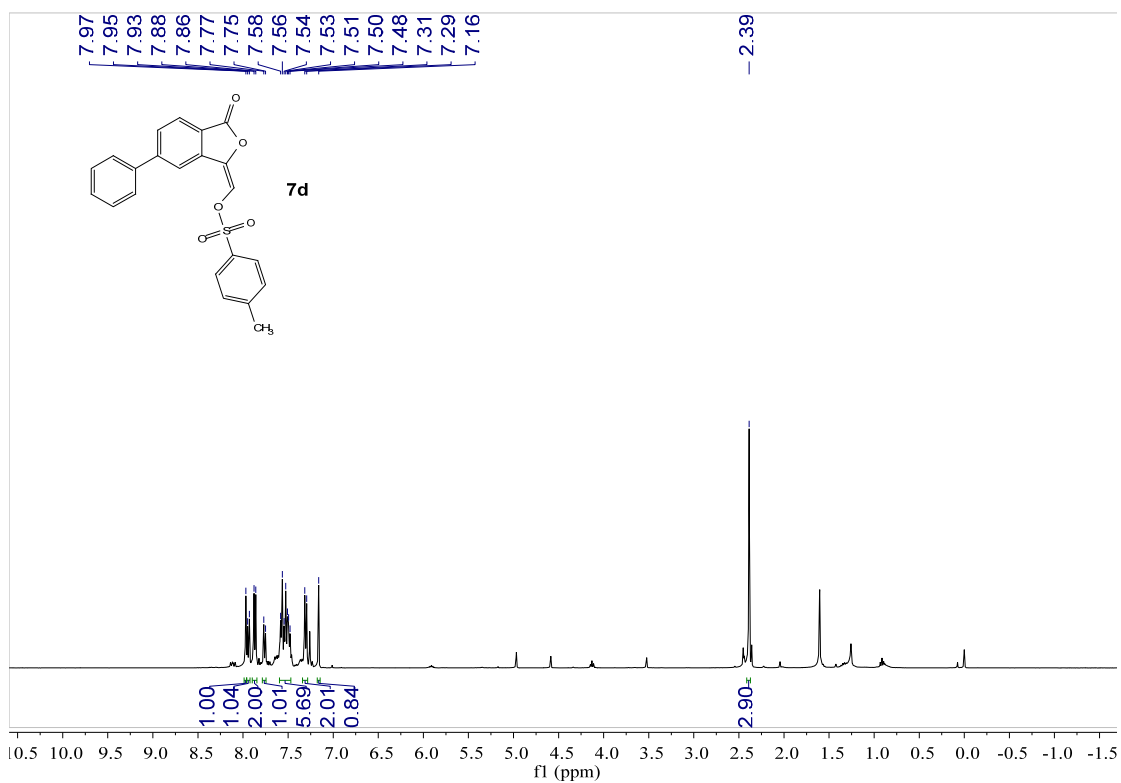

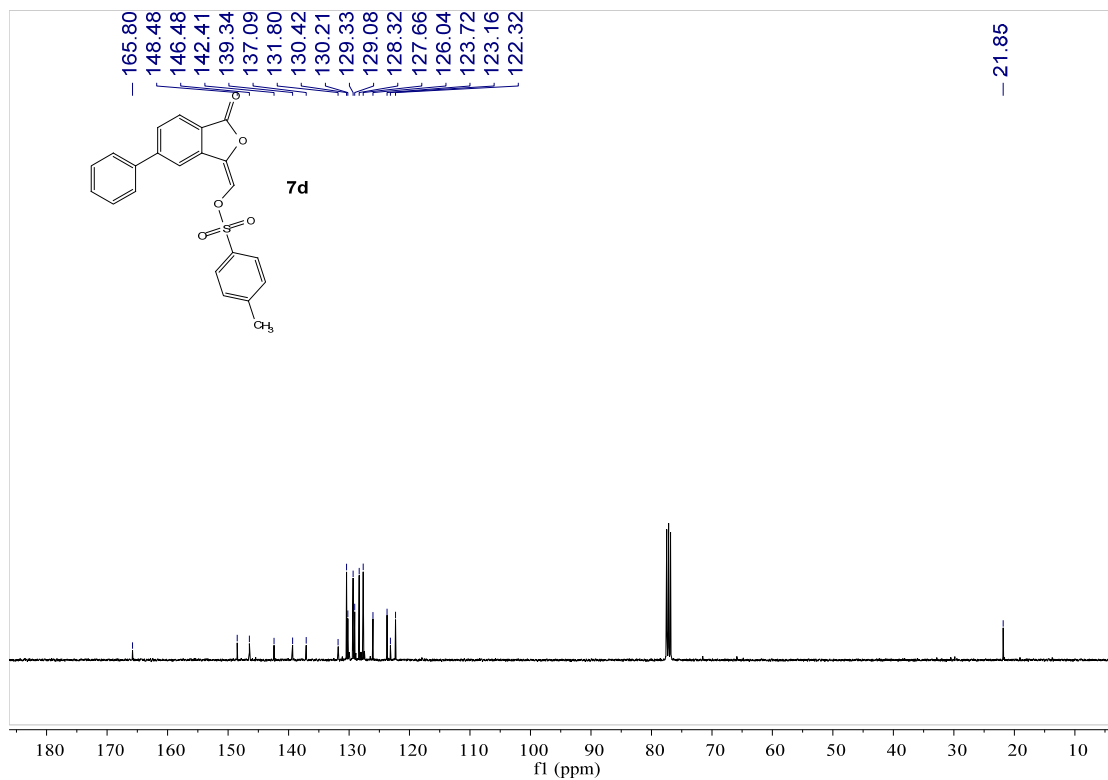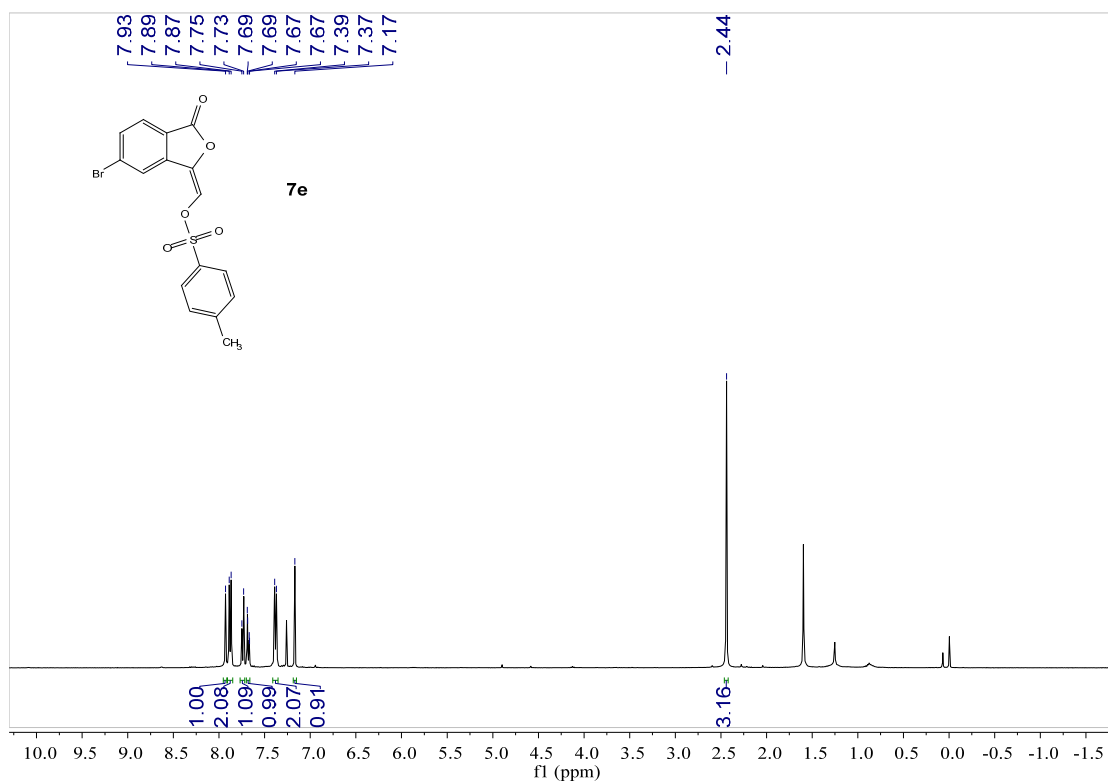

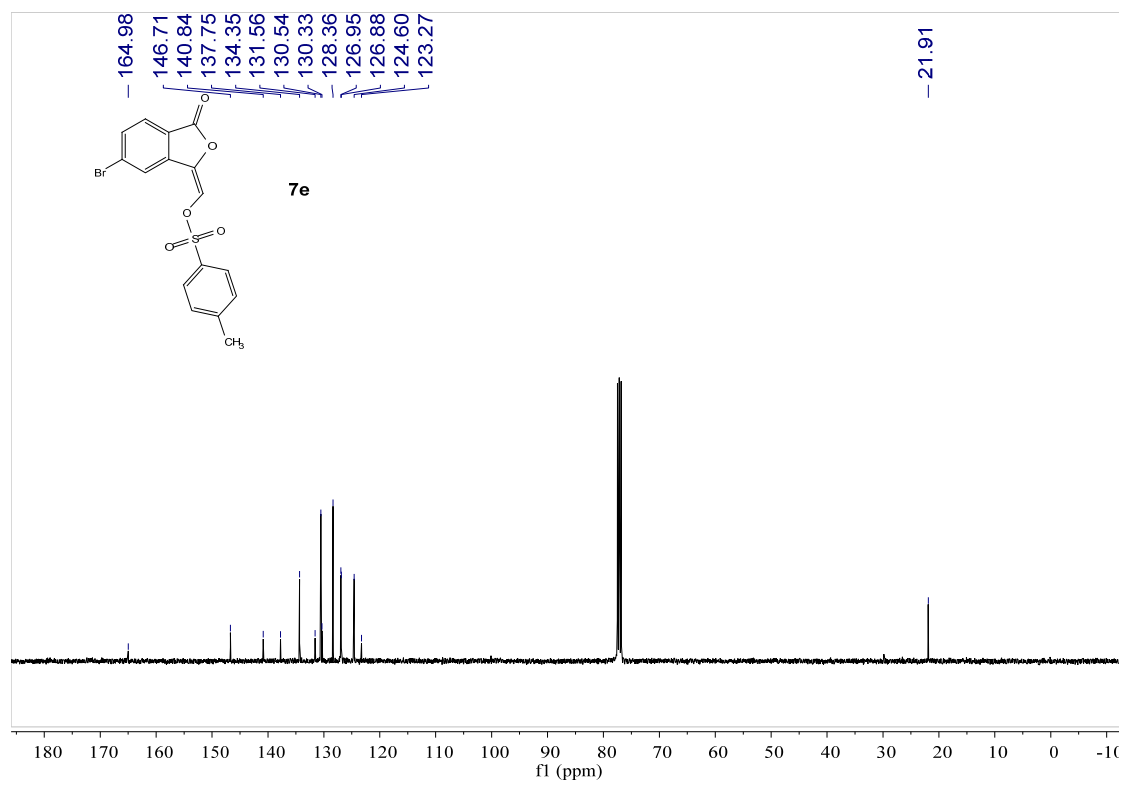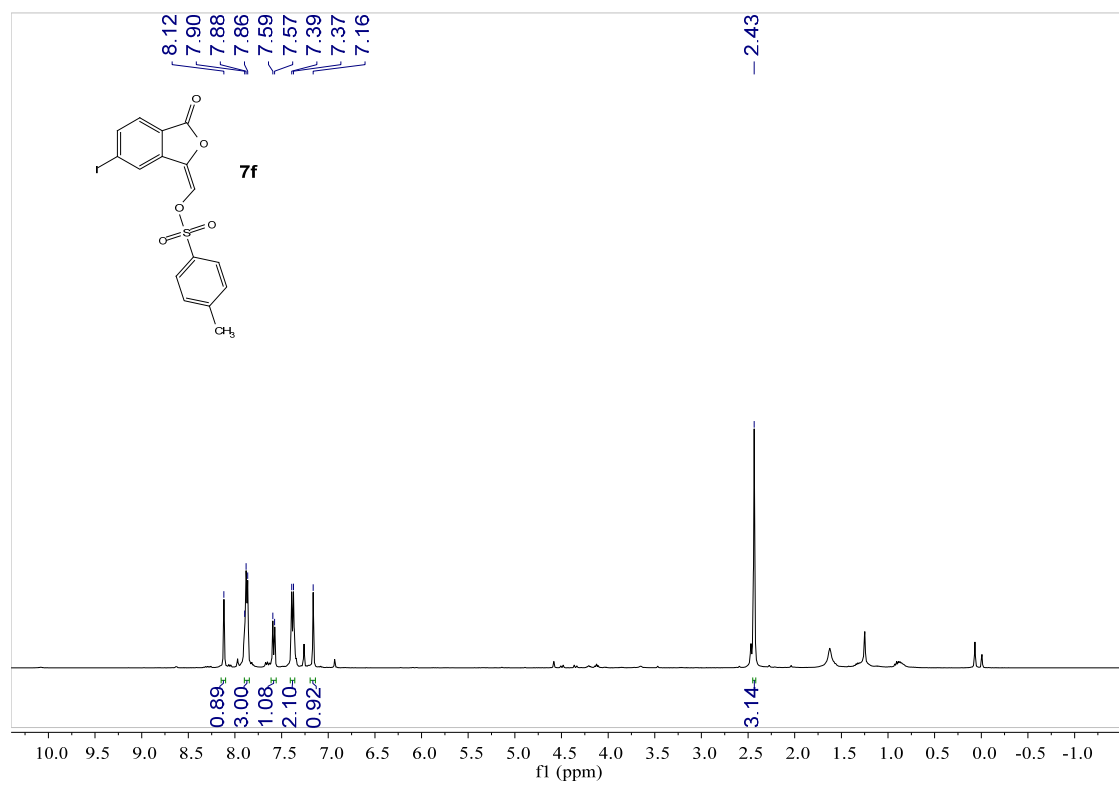

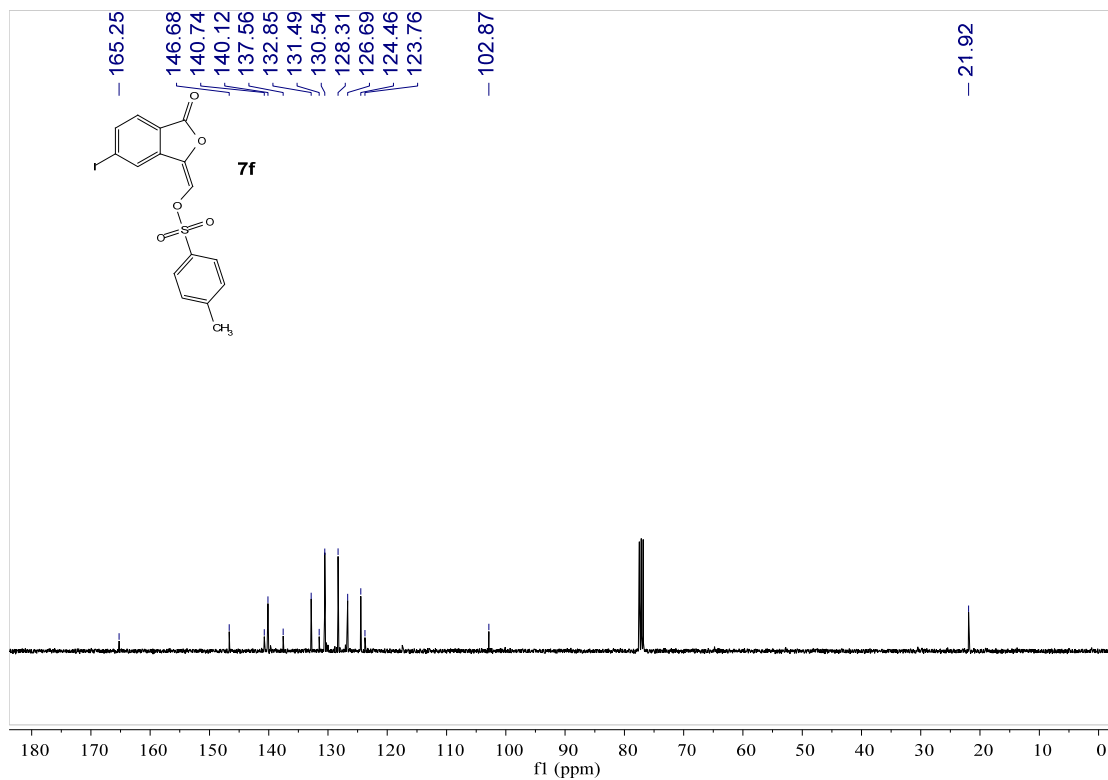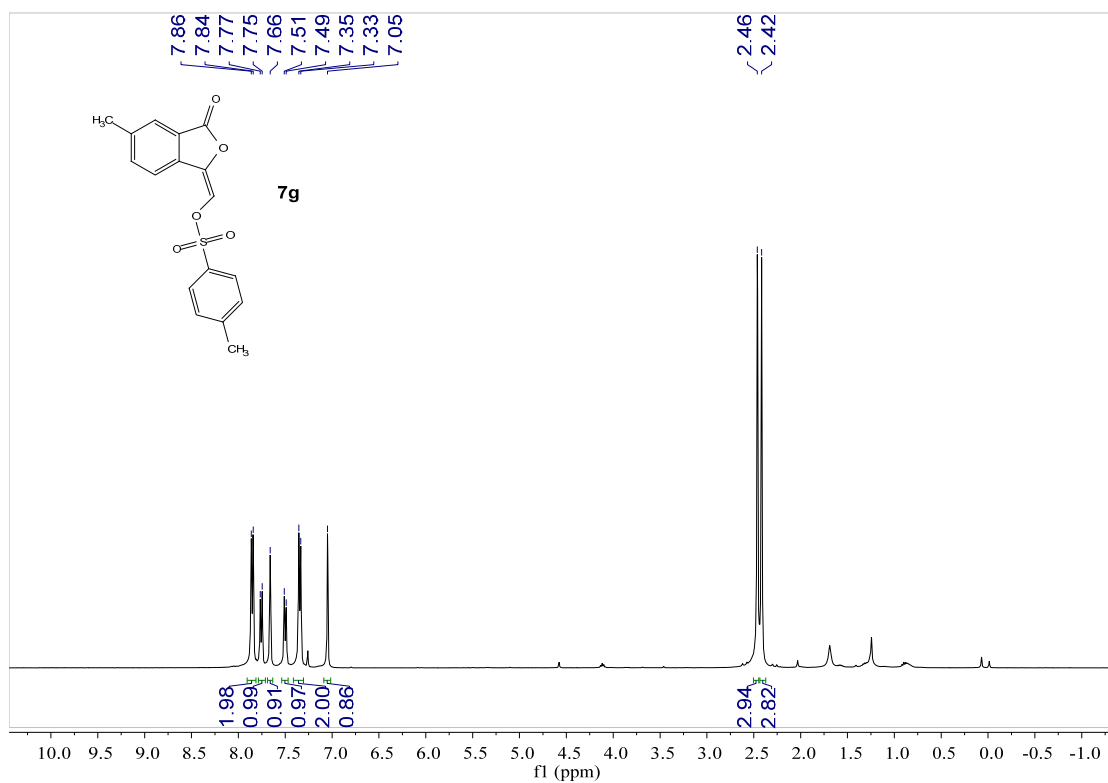

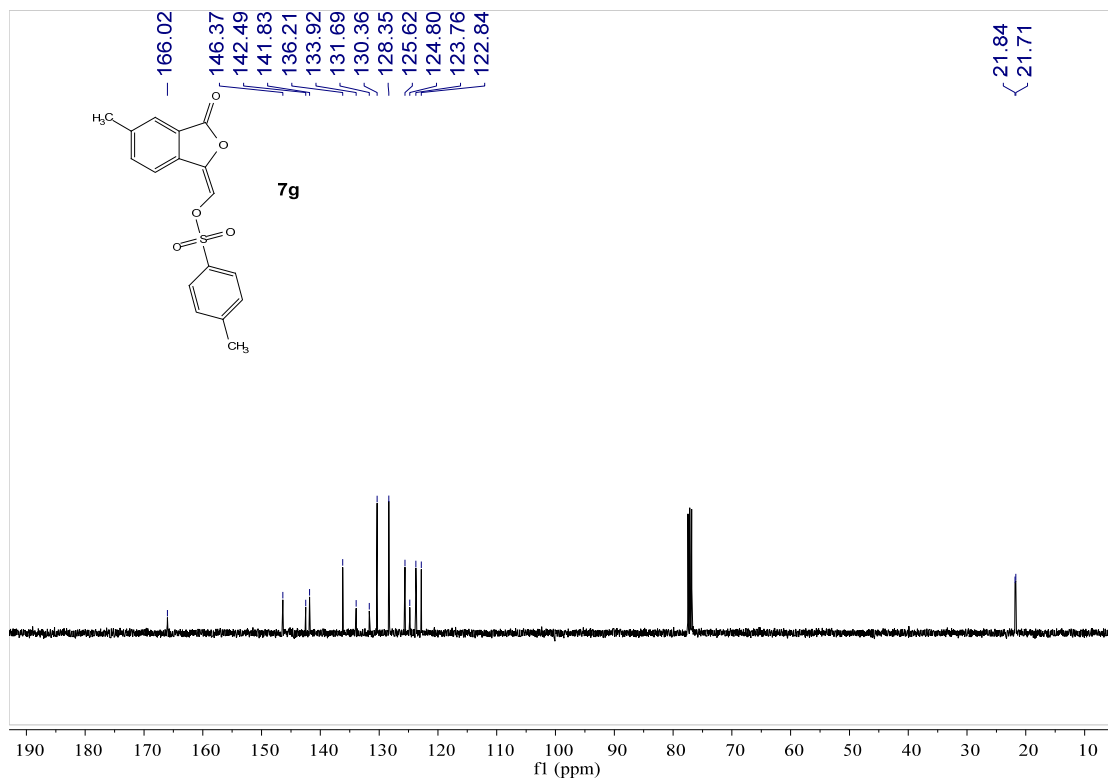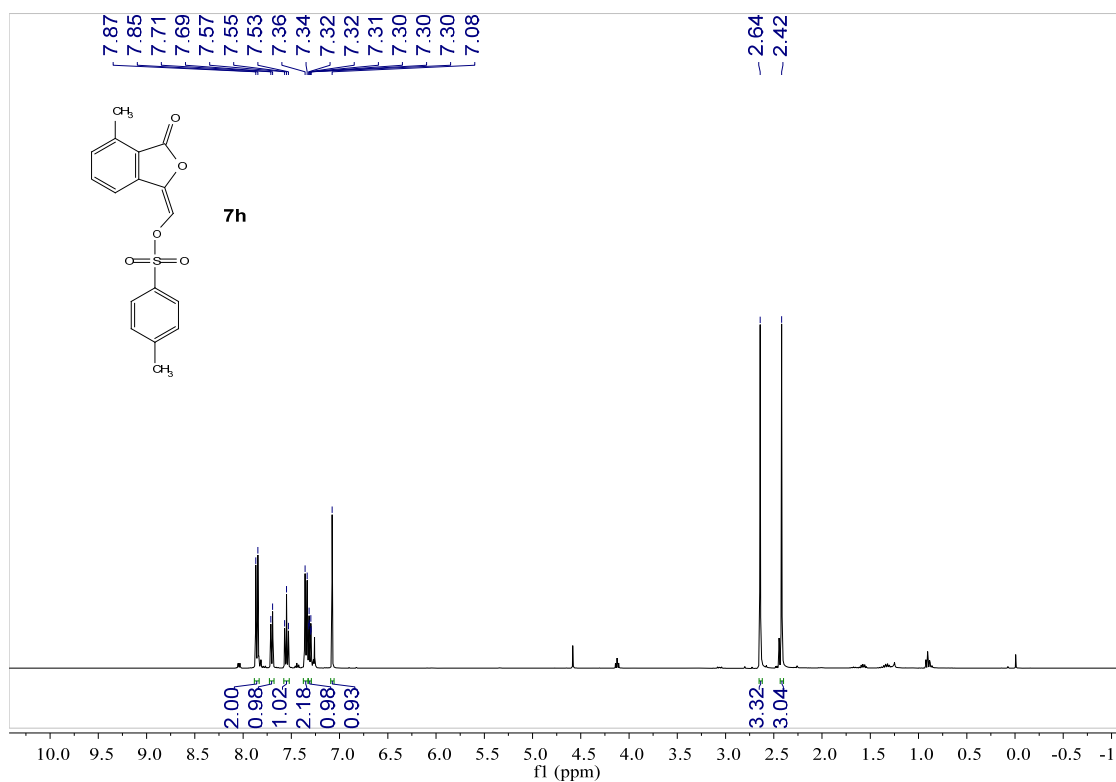



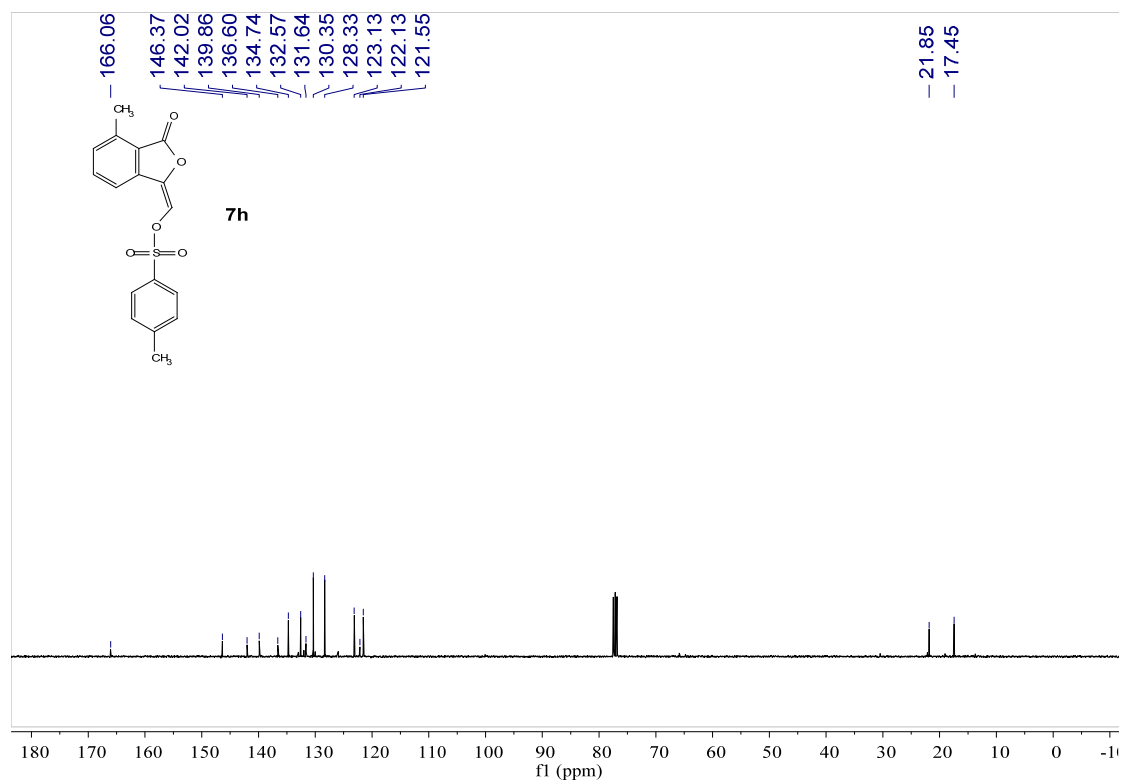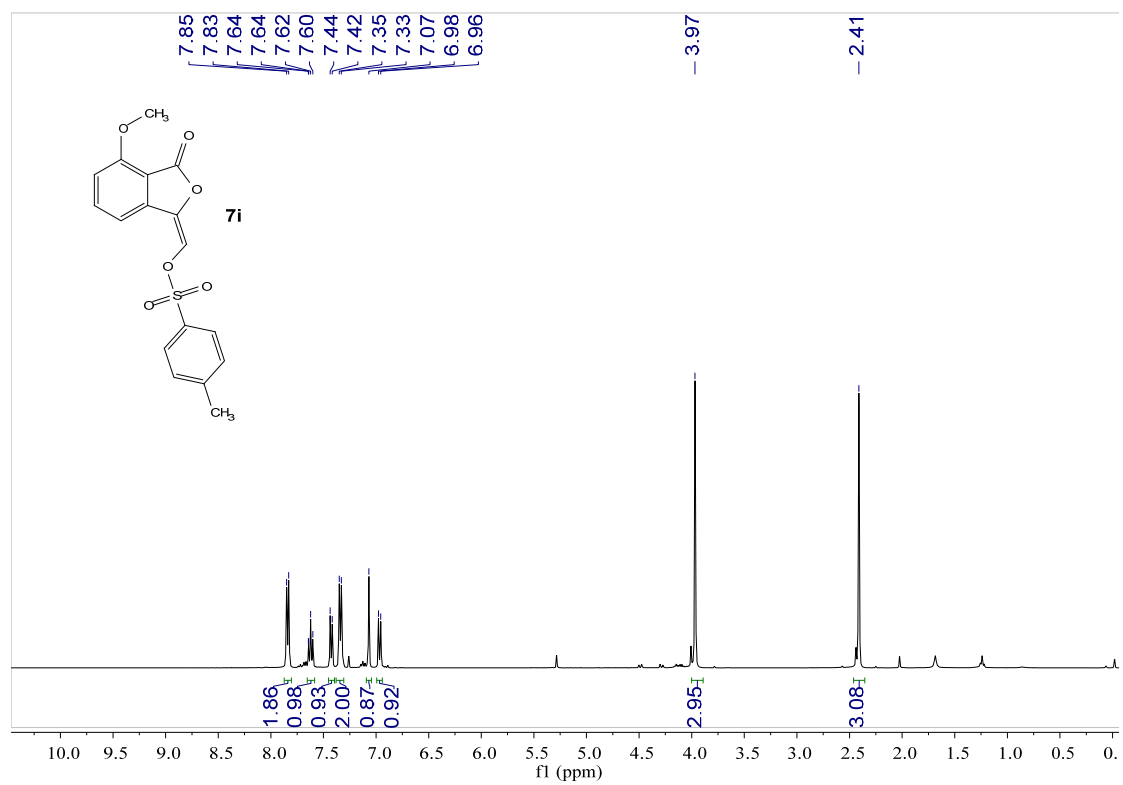

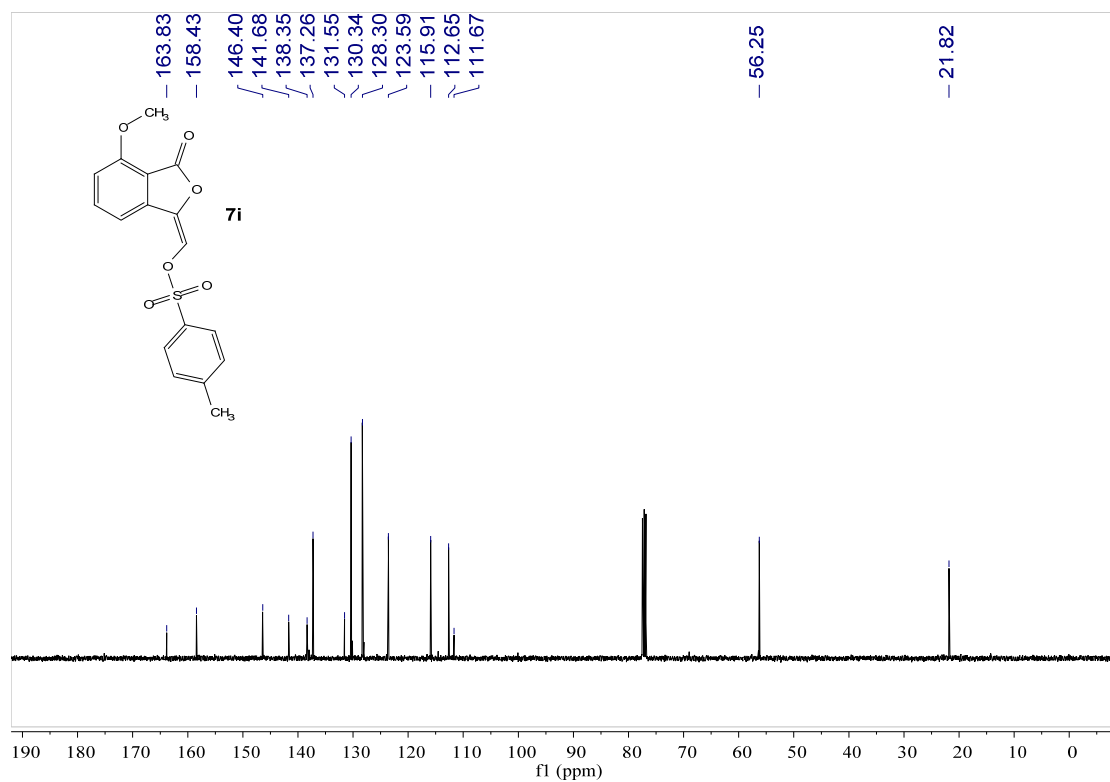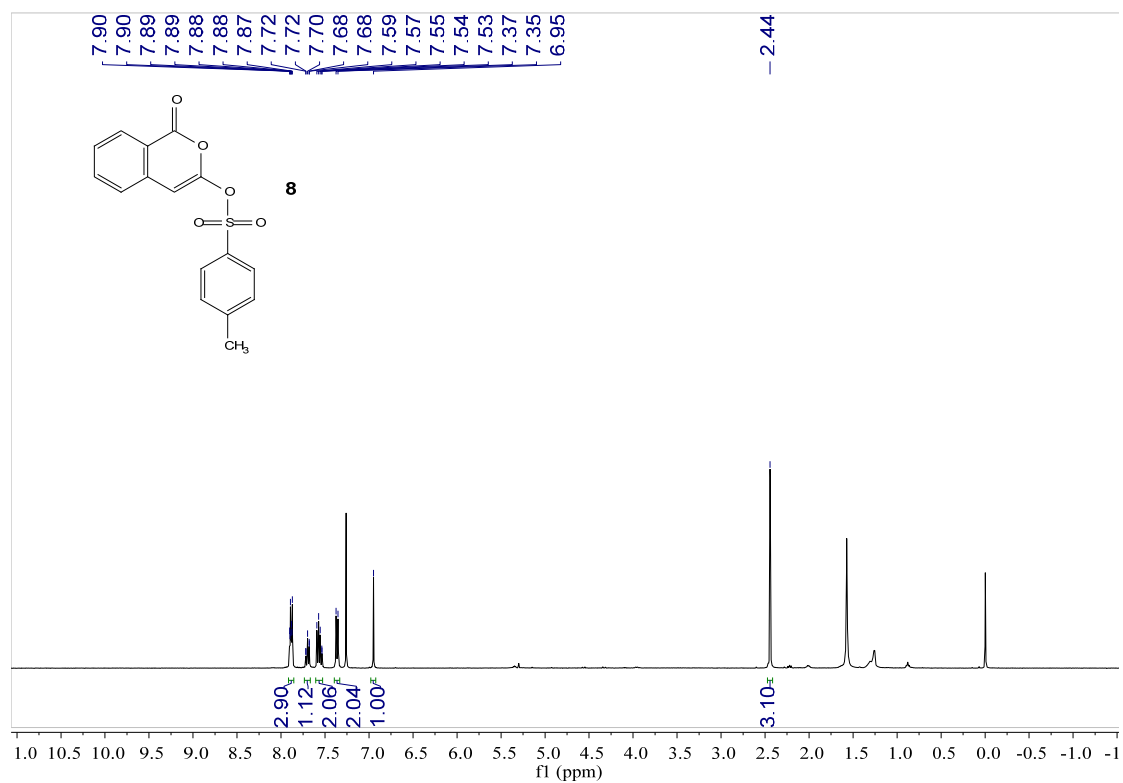

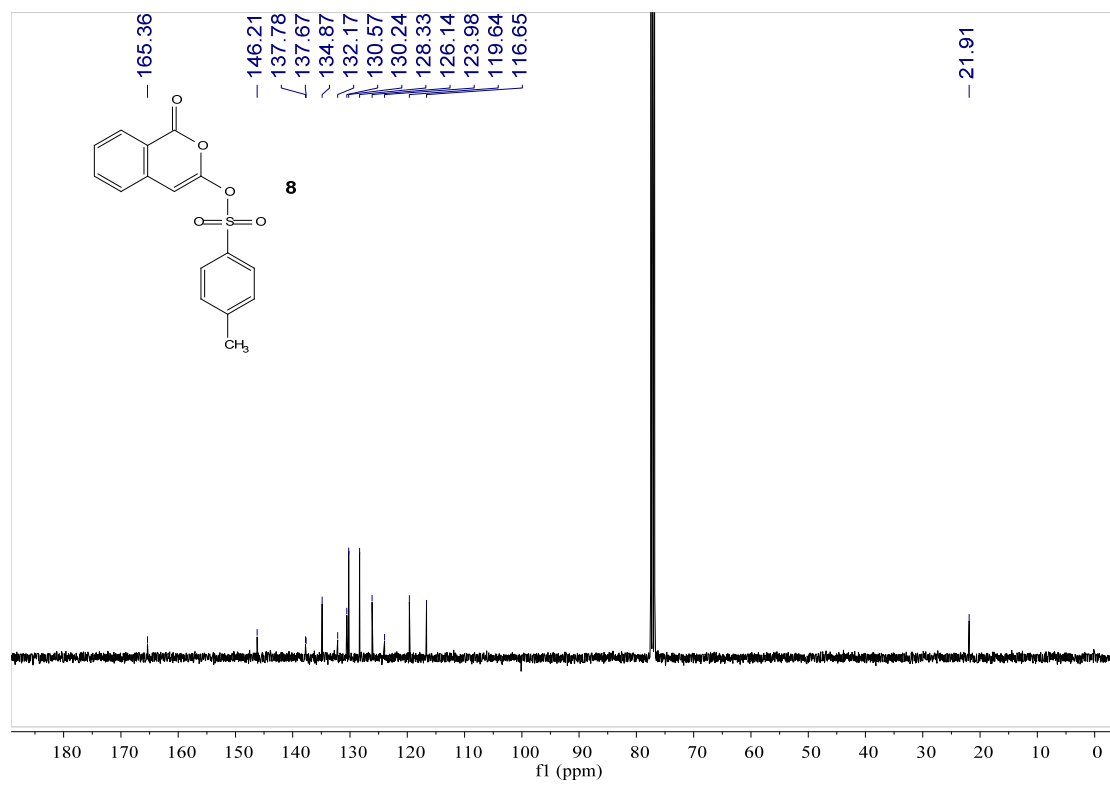

A part of the complete NOESY spectrum of compound **8** is pictured below:

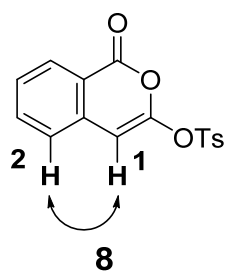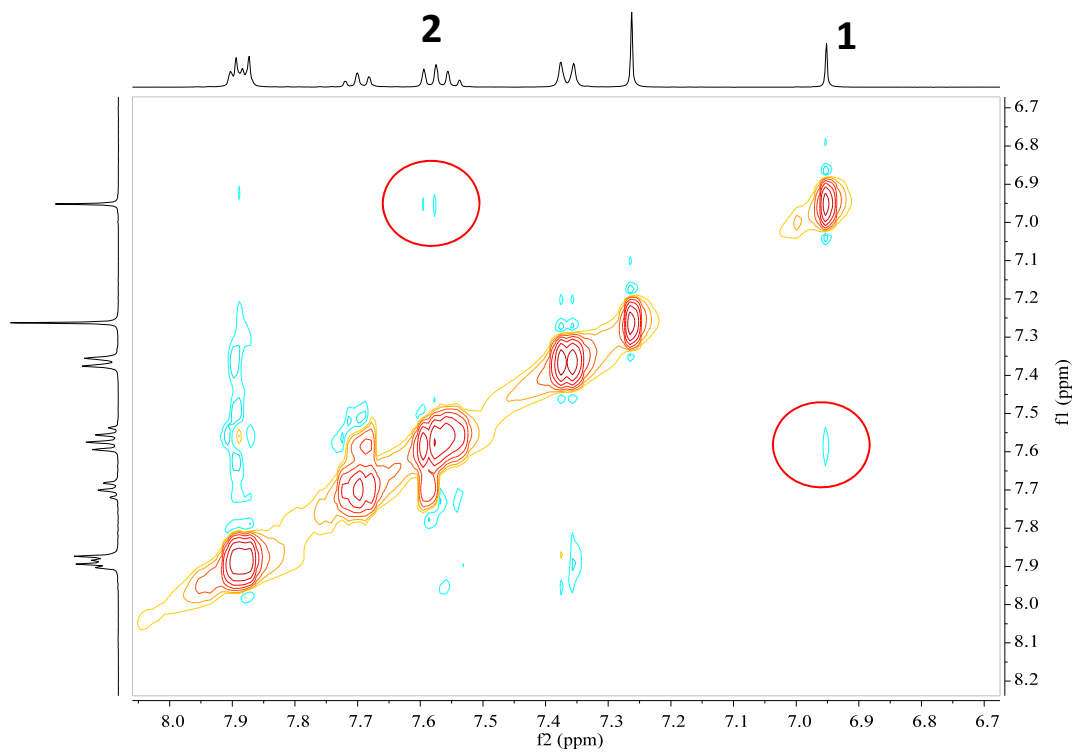

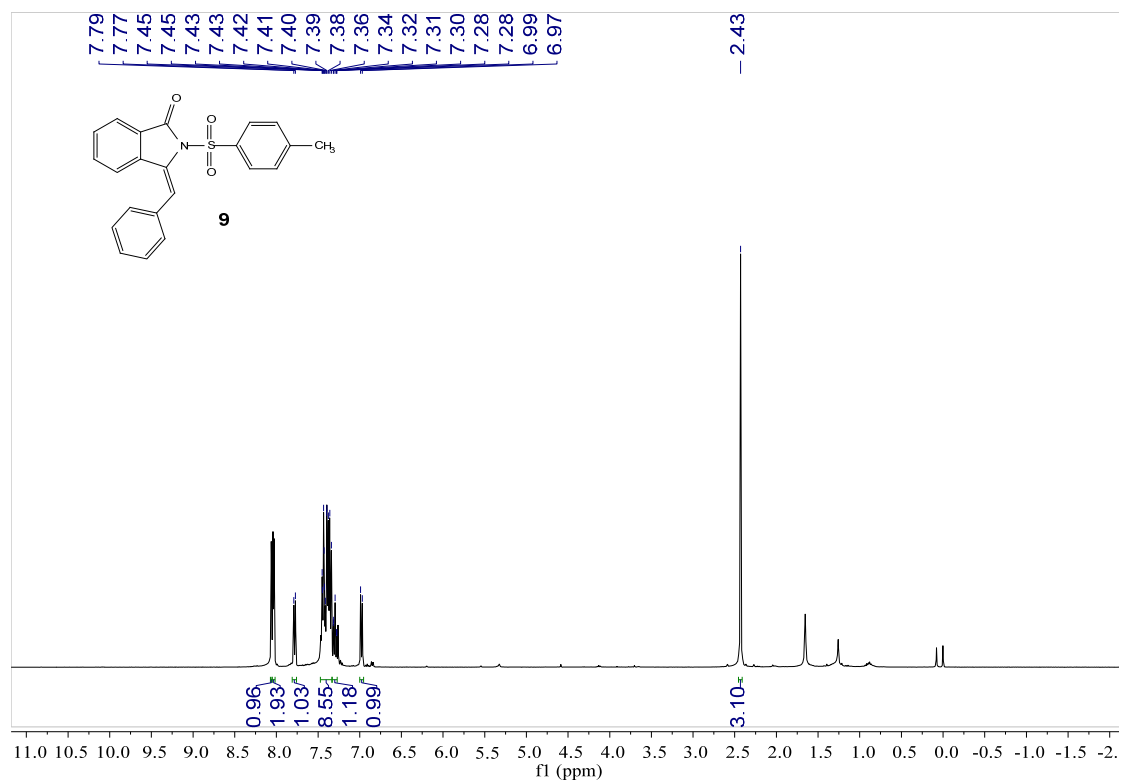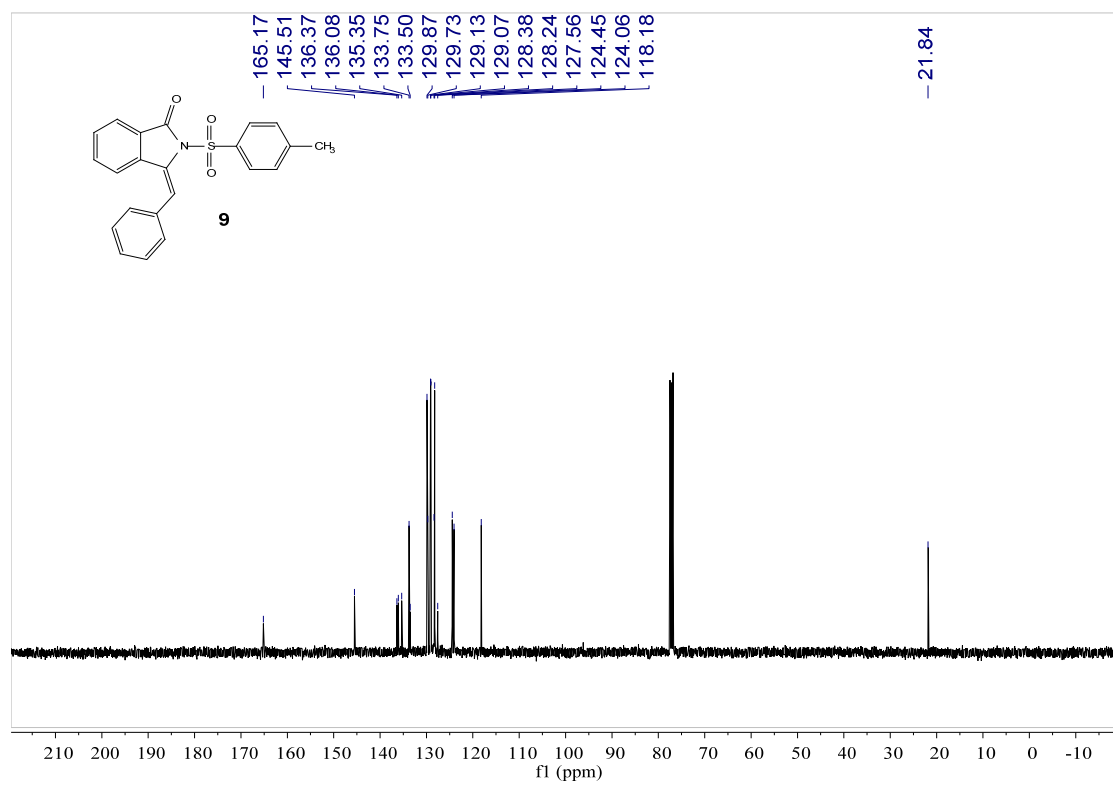

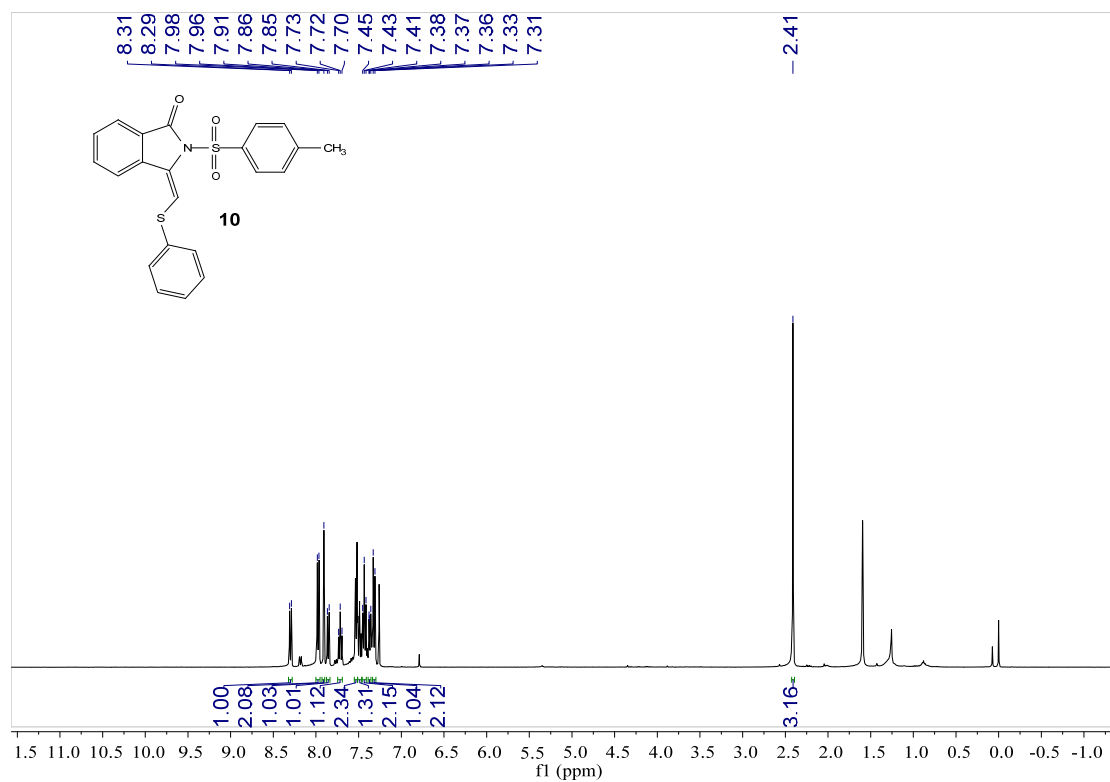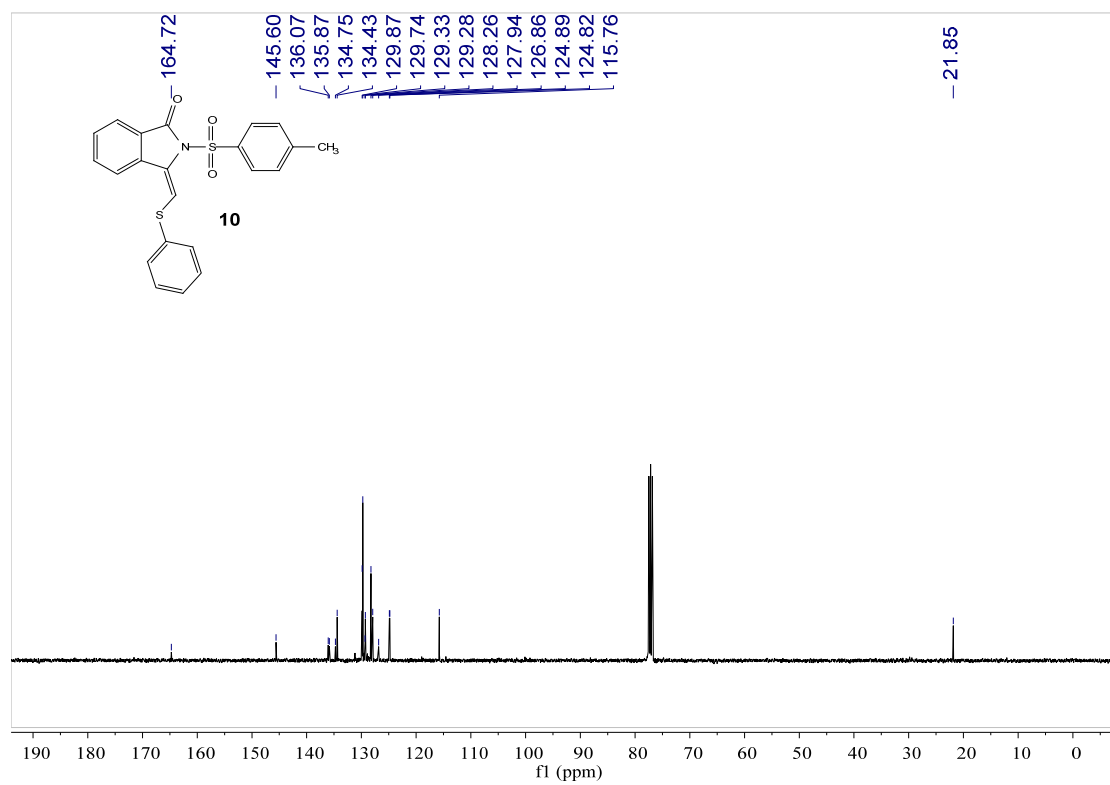

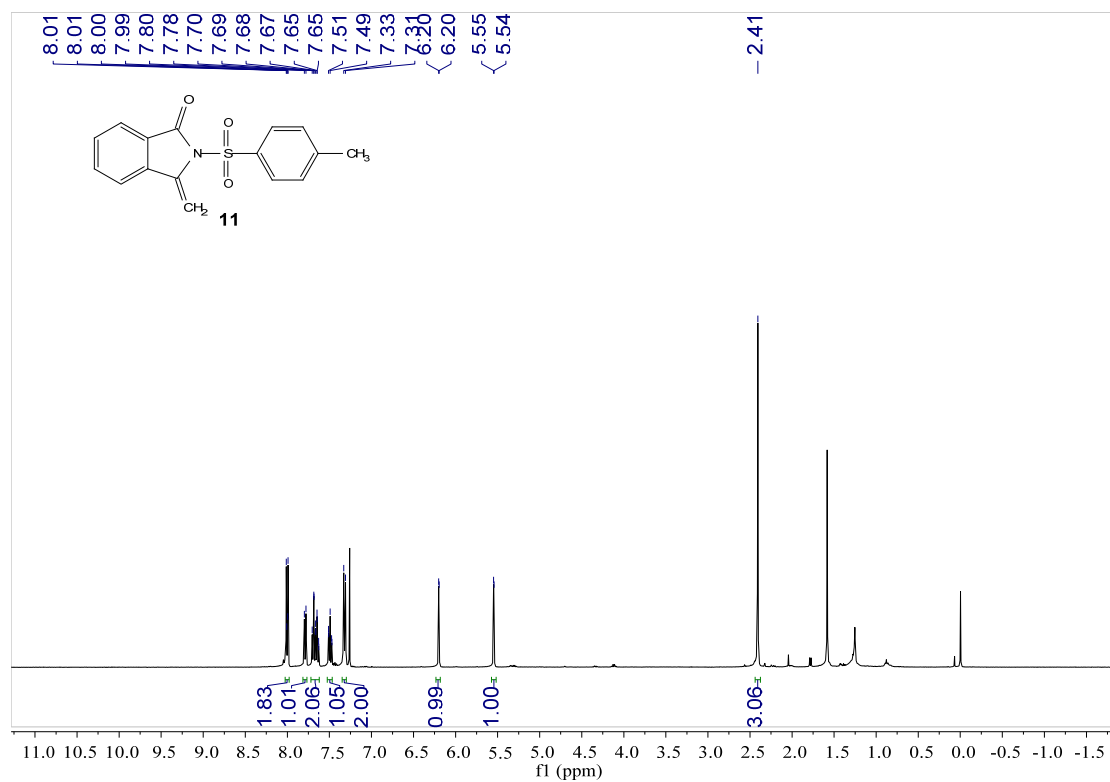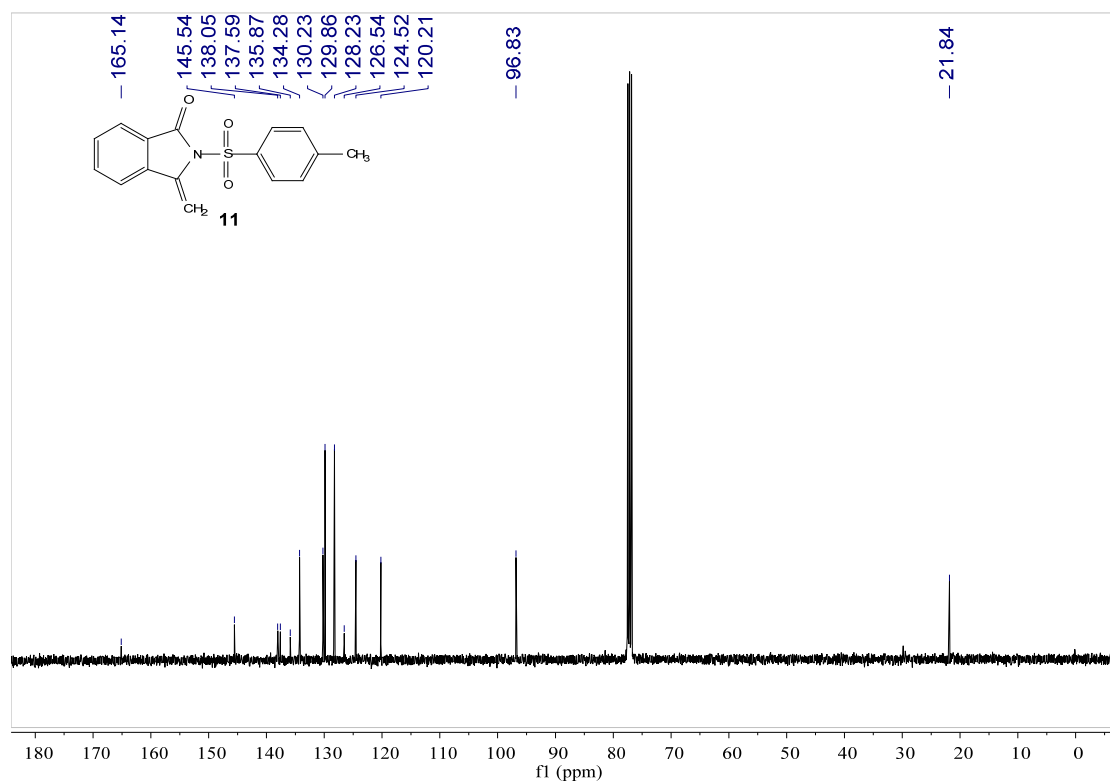

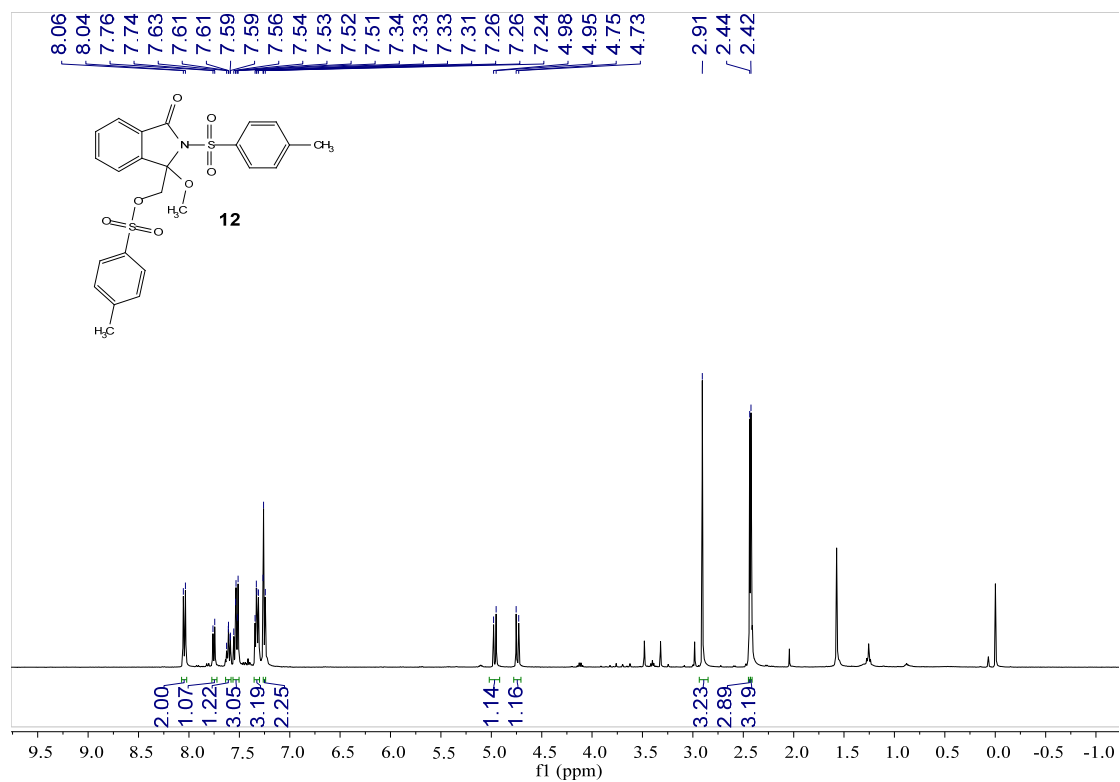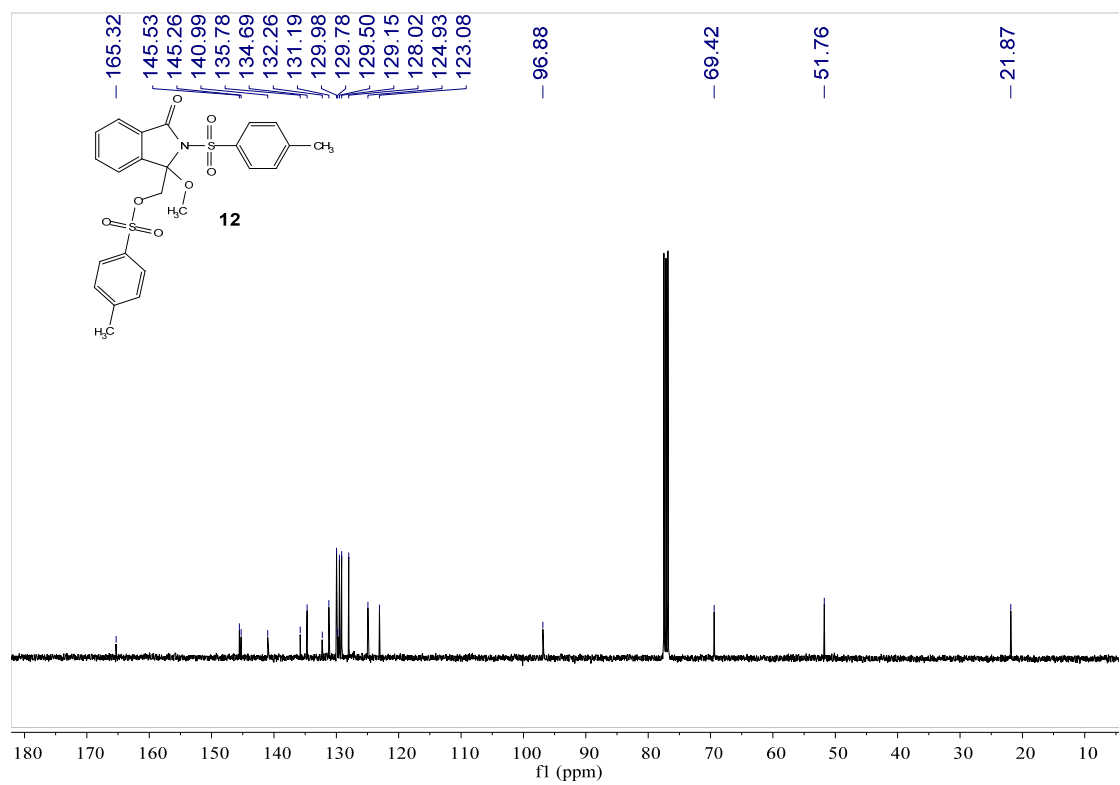

DEPT 135 spectrum is pictured below:



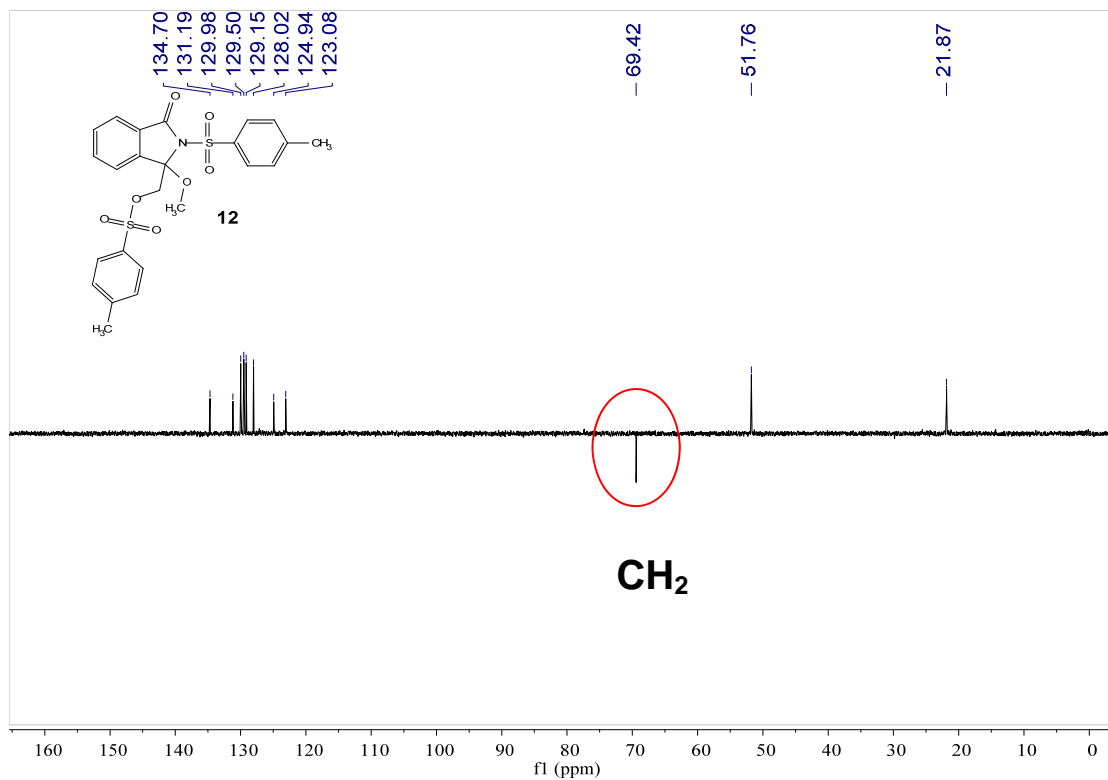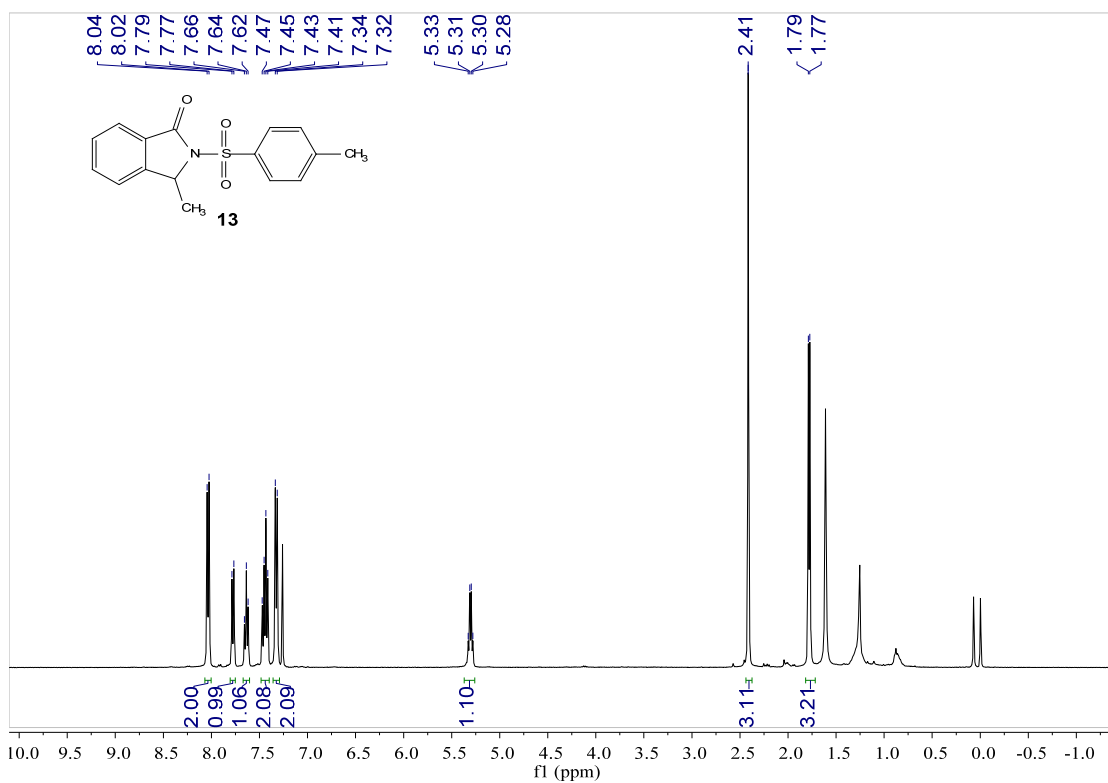

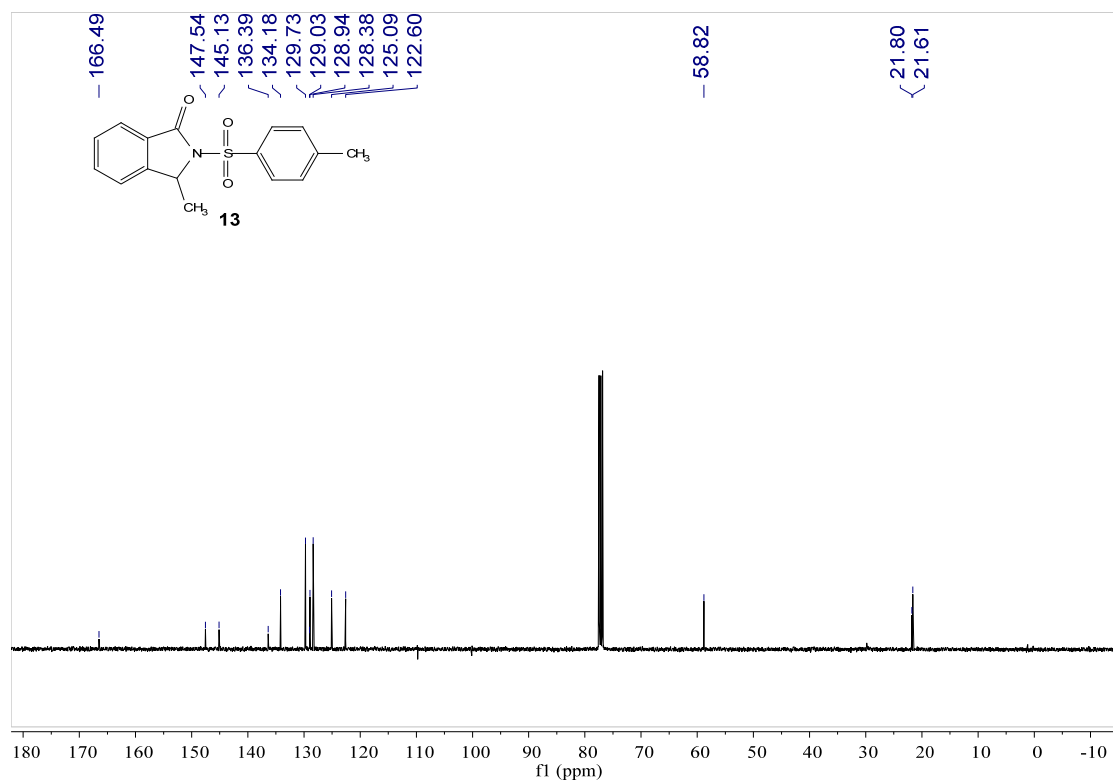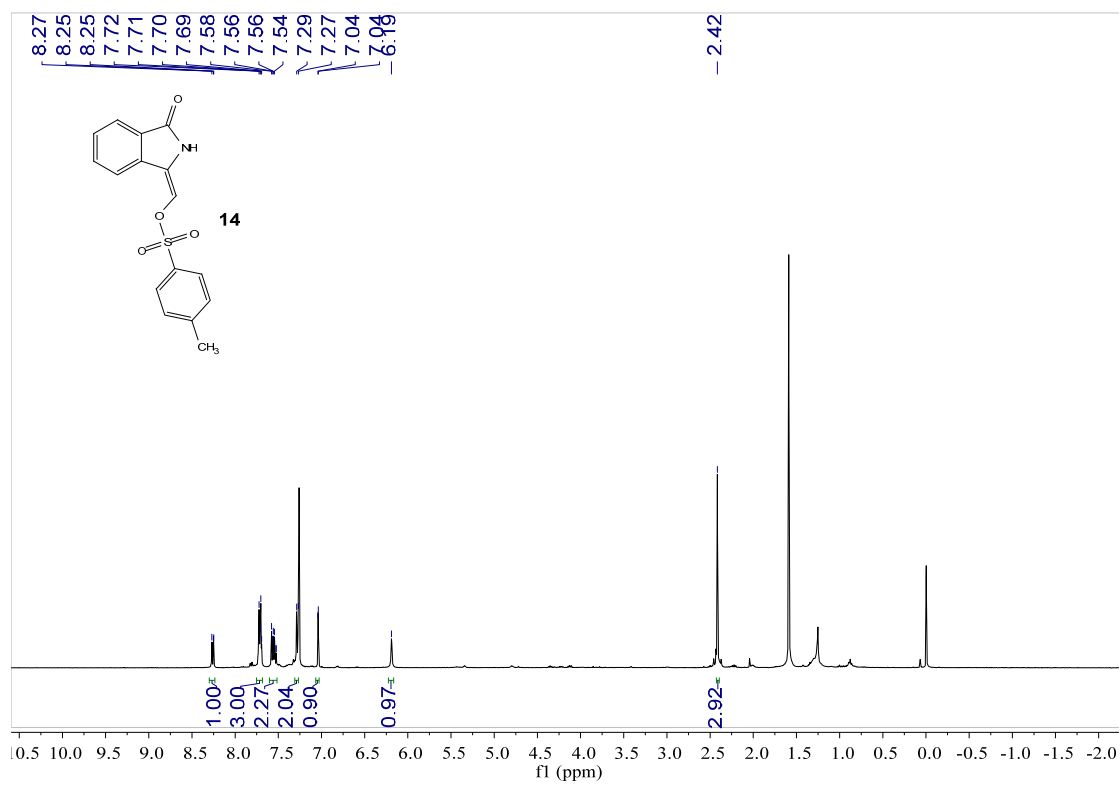

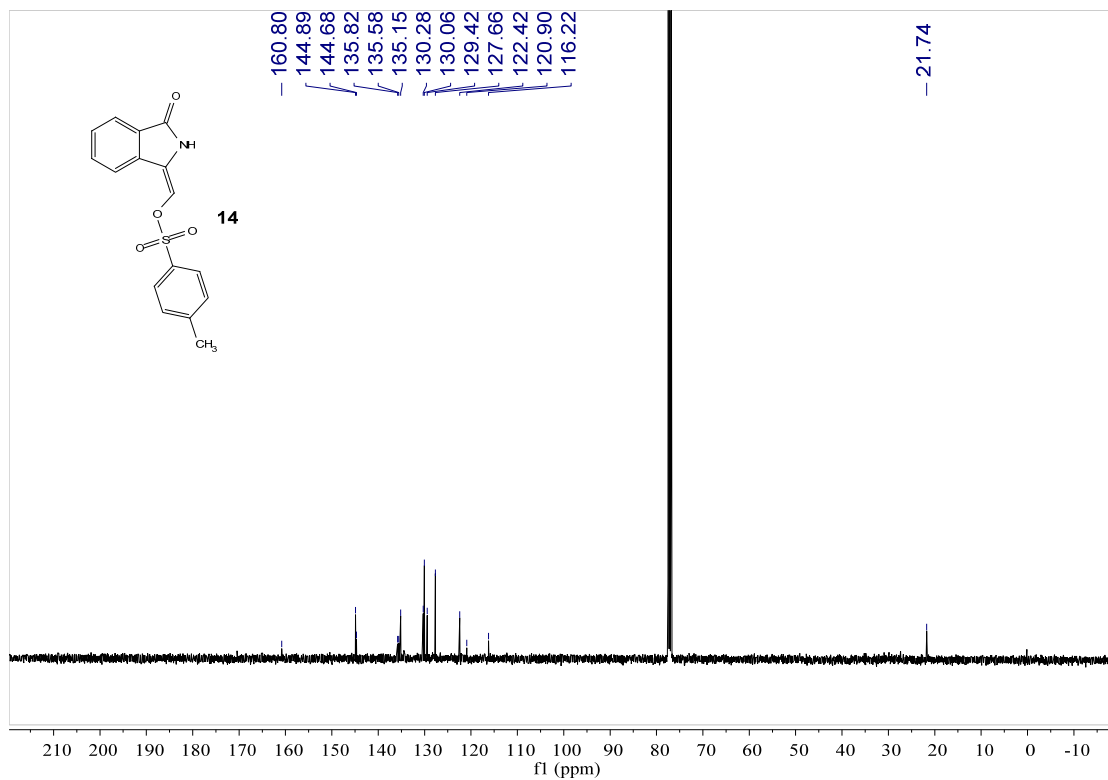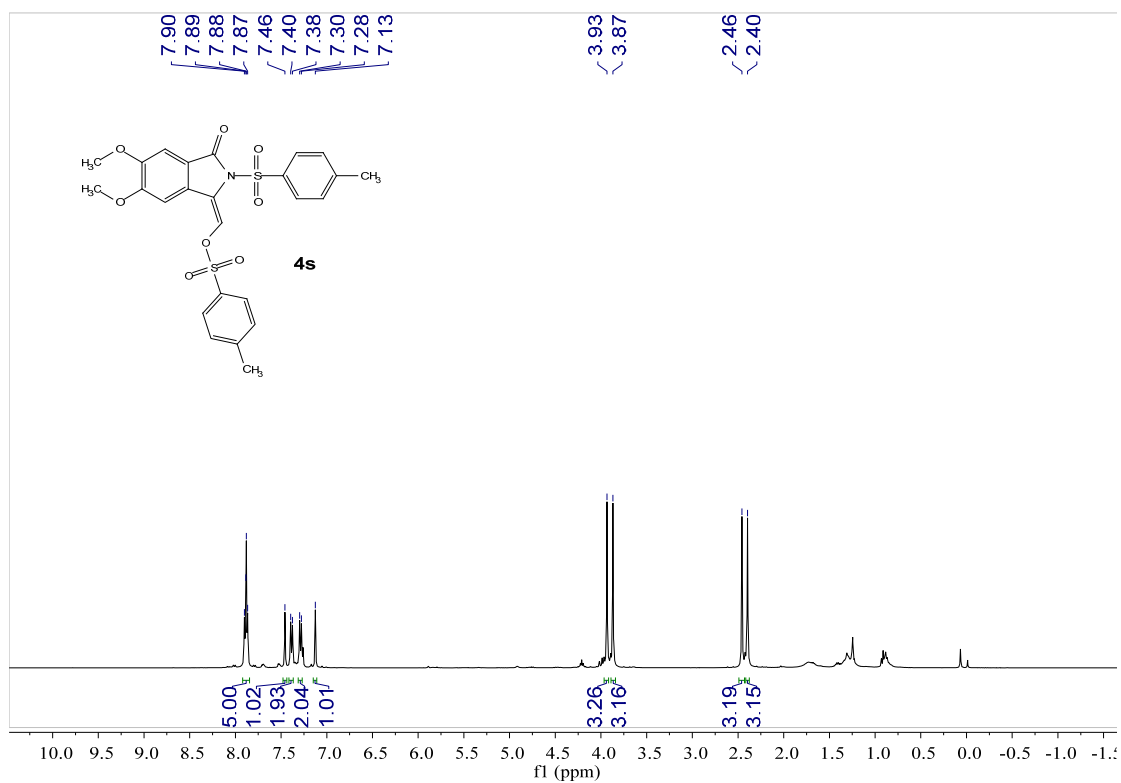

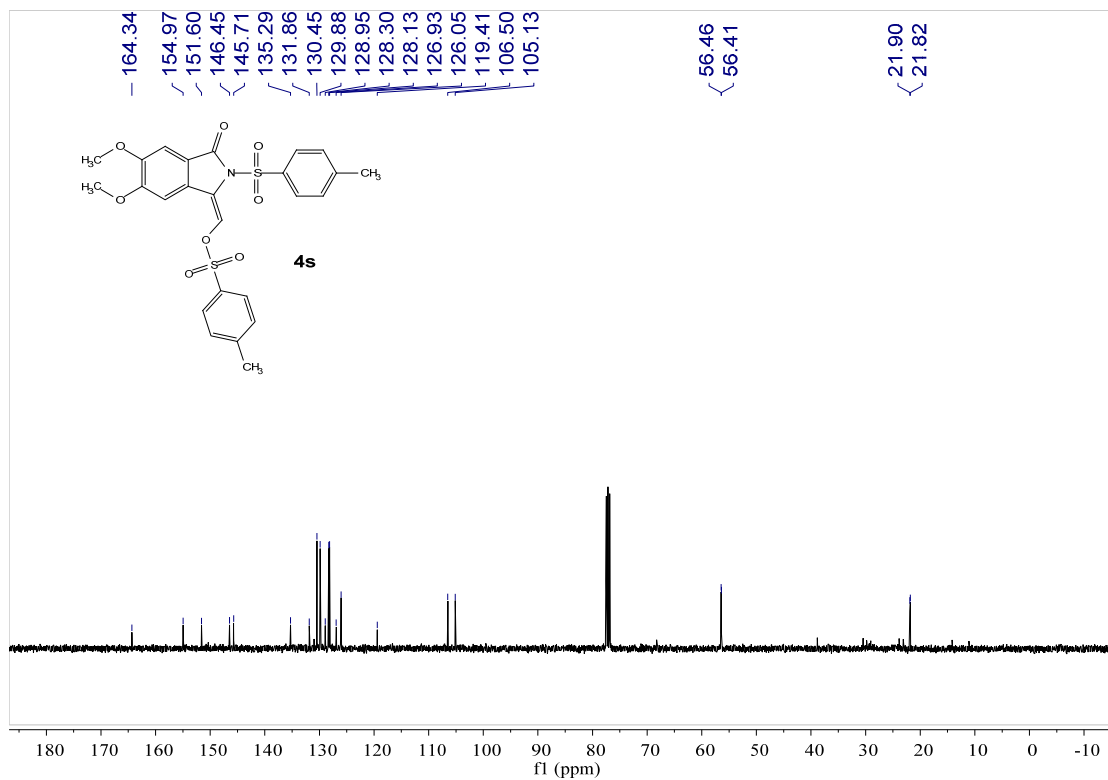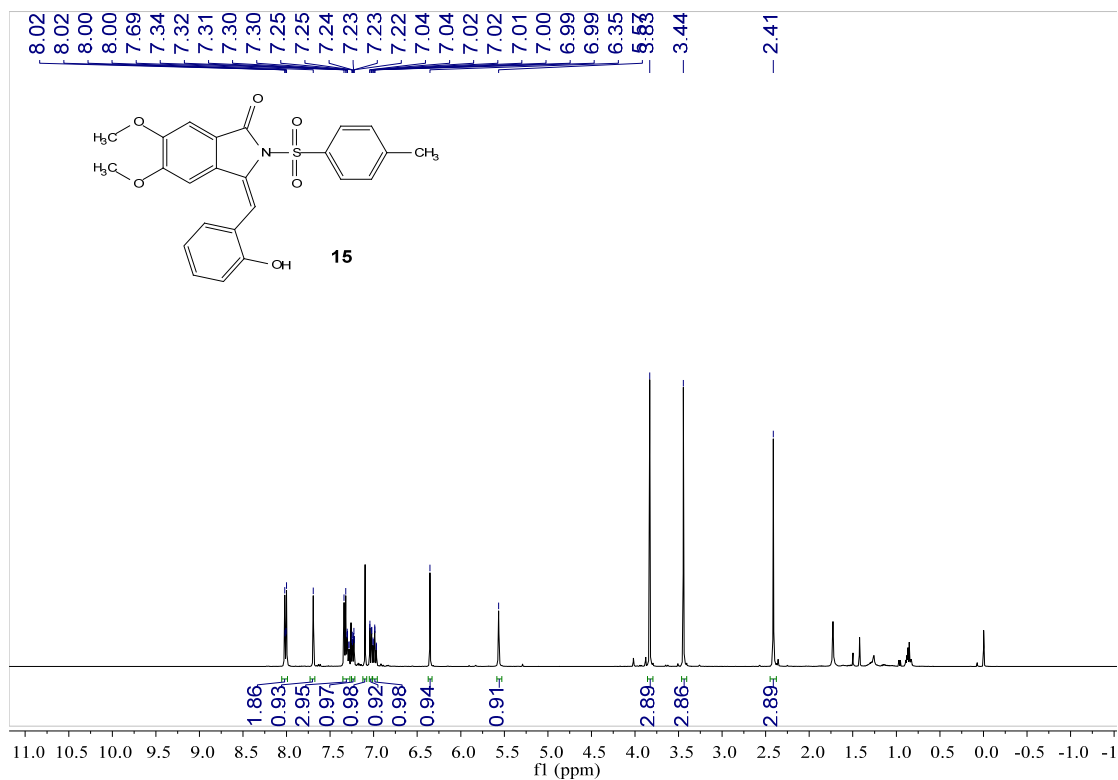

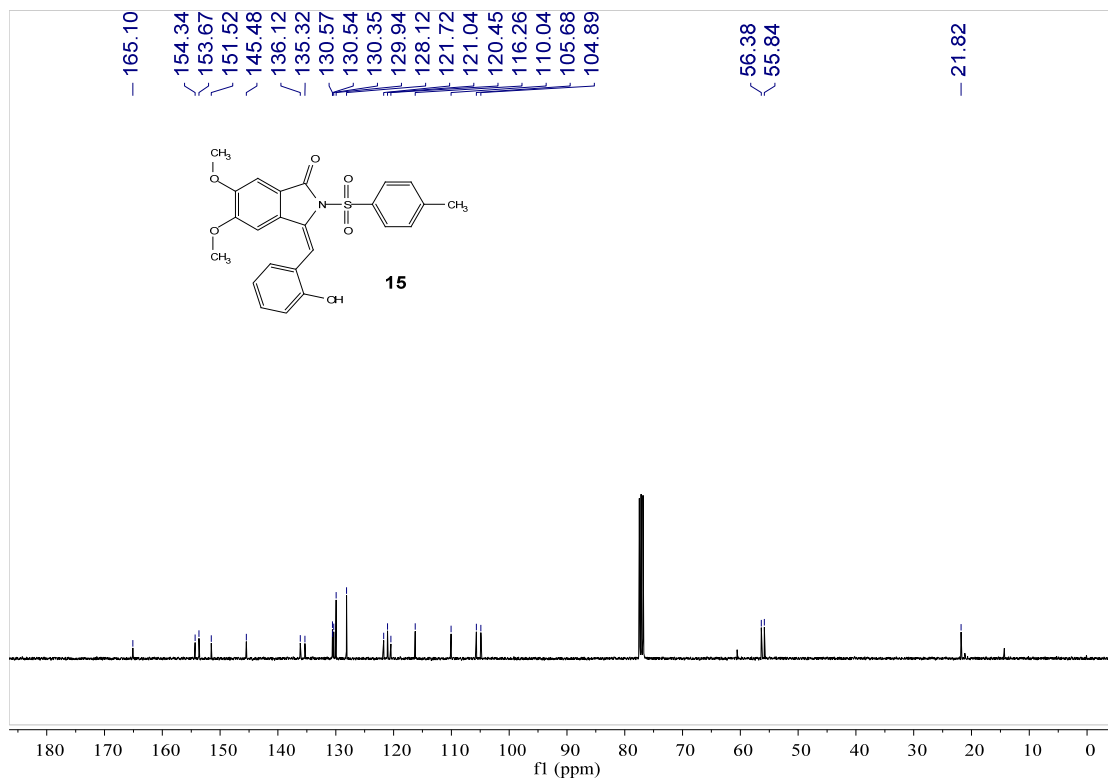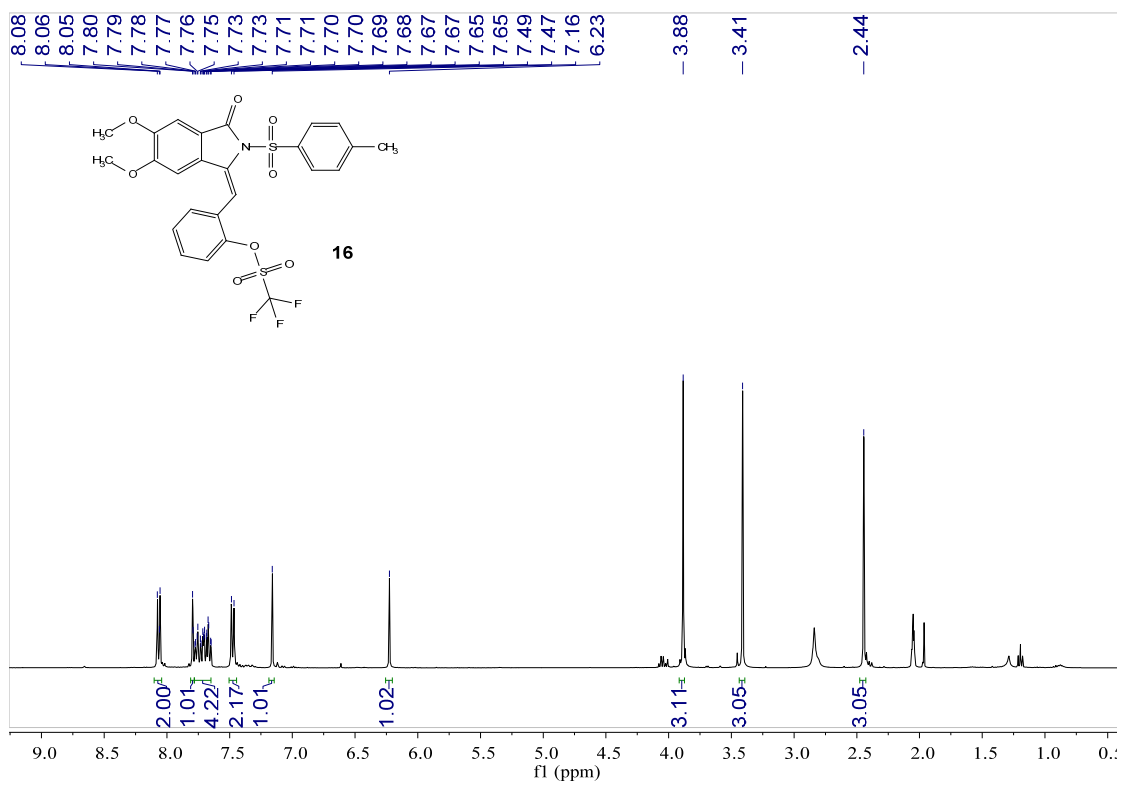

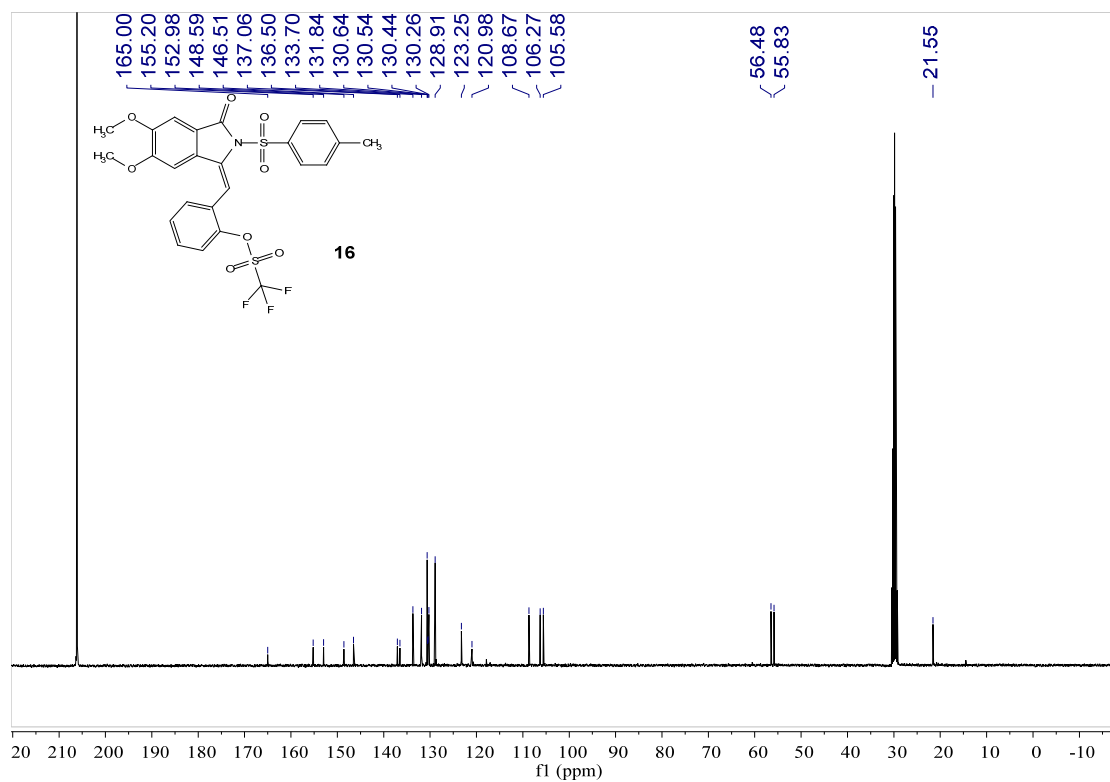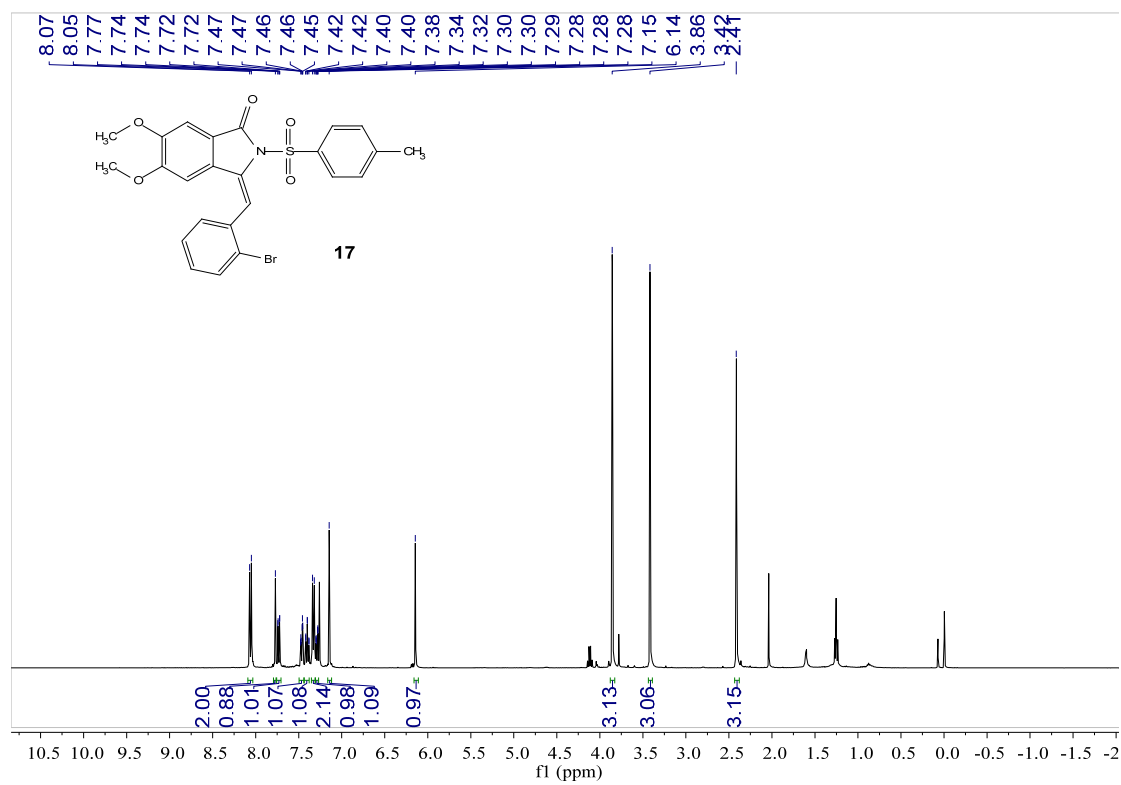

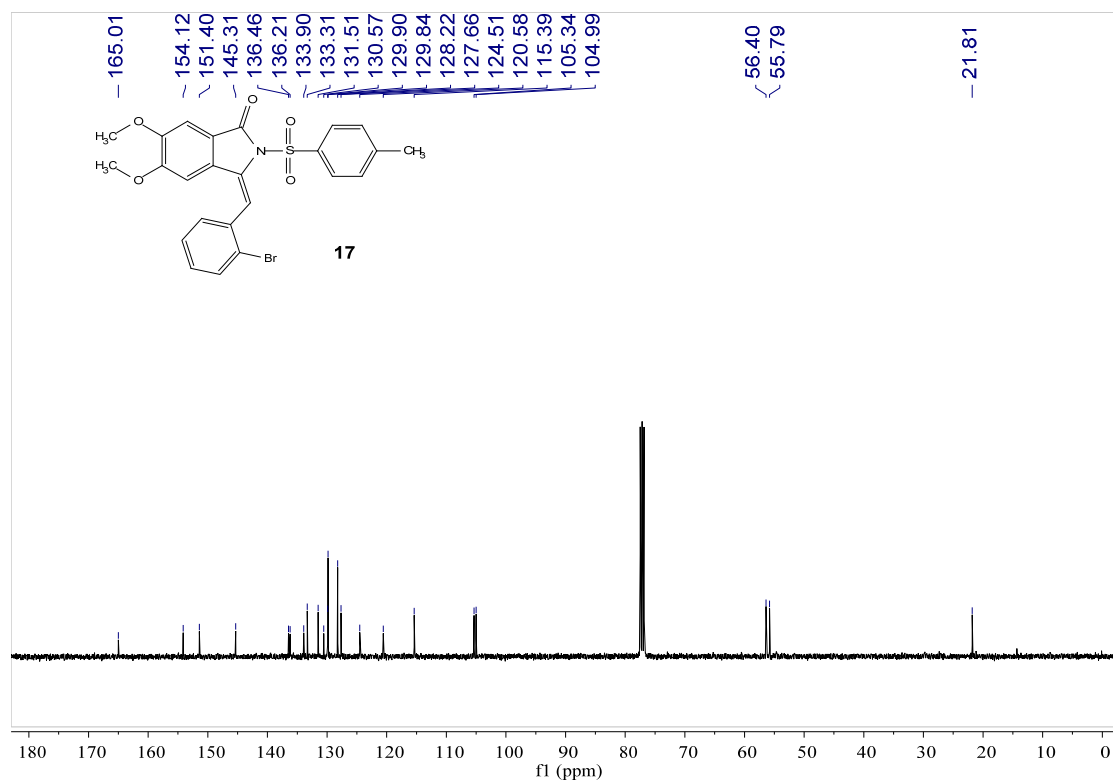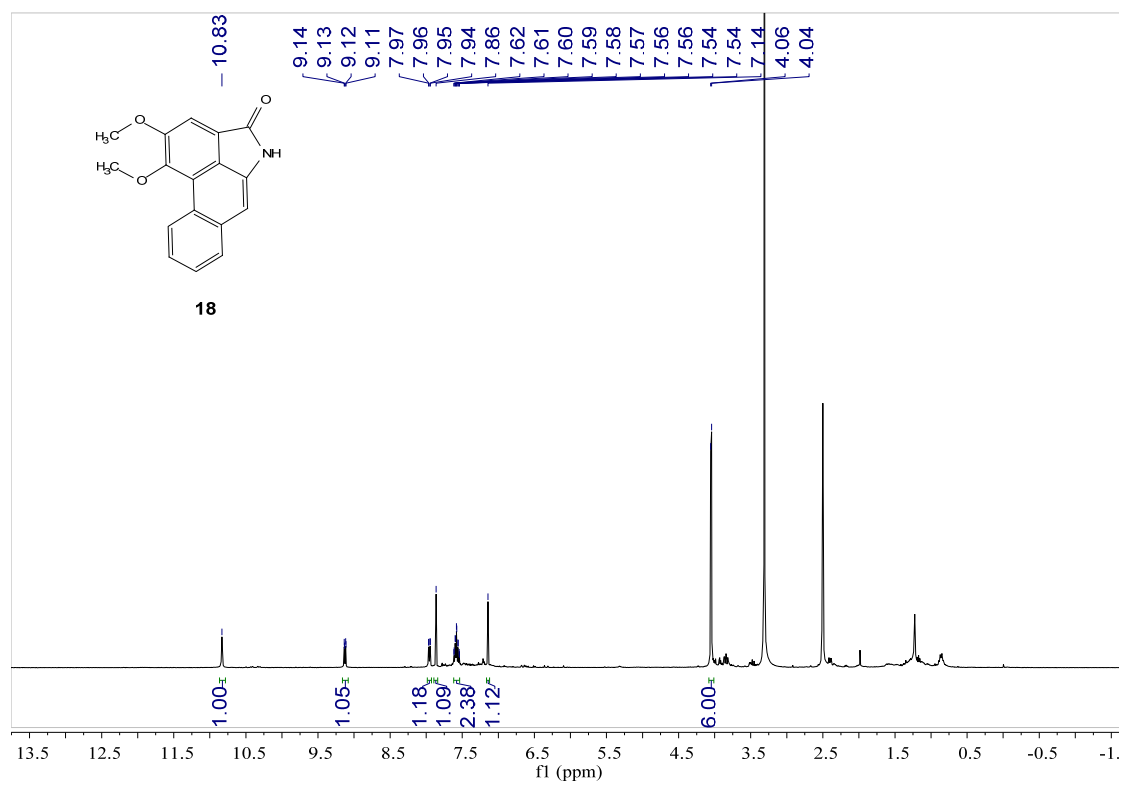

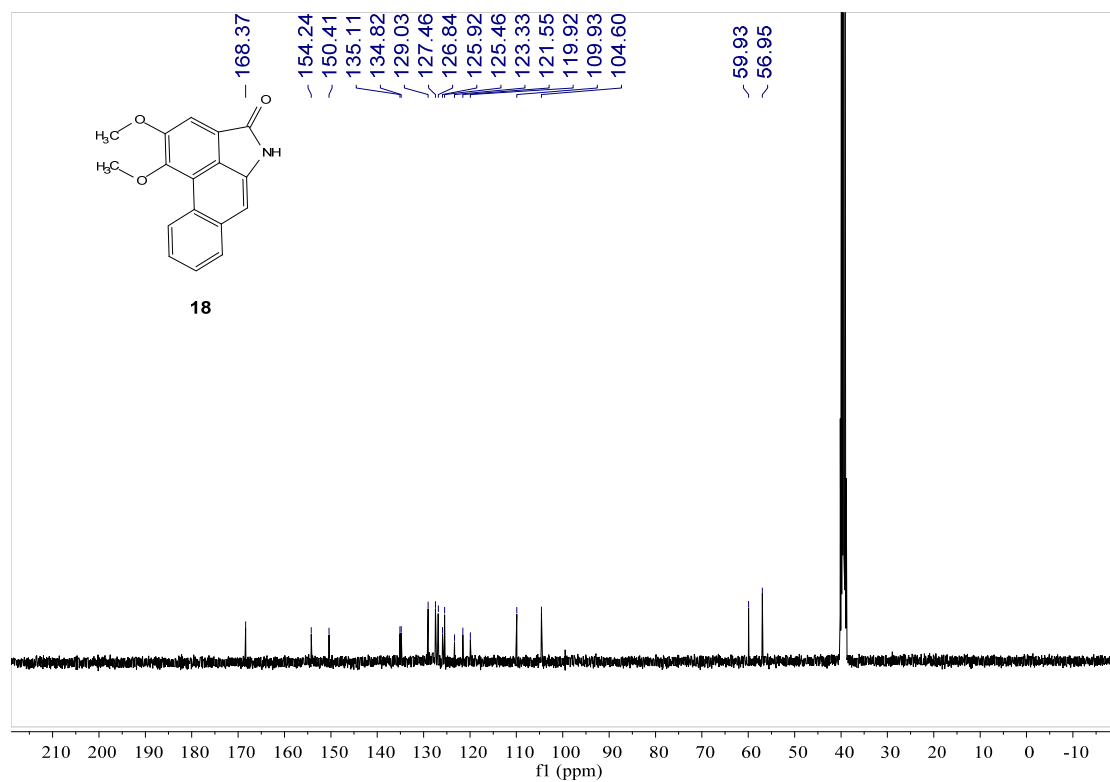

Supplement: c7cc02105d1.pdf [file c7cc02105d1.pdf]
